# Supplementary material
Source: Research Square preprint supplement (doi:10.21203/rs.3.rs-9109439/v1)
Supplement: Supplementary file 1 [file d506293763f55d45dfbdcf31.docx]

**Legends of supplementary material**

**Figure S1.** Flowchart of participant inclusion and exclusion

**Figure S2.** Evaluation of IPW for the Analysis of MetS and UTI Association

**Figure S3.** Comparison of Standardized Mean Differences Before and After IPW Weighting (MetS as Treatment)

**Figure S4.** IPW Weight Boxplot by nMetS Subgroup (1%-99% Trimmed)

**Figure S5.** IPW Weight Distribution Histogram by nMetS Subgroup (1%-99% Trimmed)

**Figure S6.** Association Between nMetS and UTI Risk: A Comprehensive Visual Analysis with Stabilized IPW

**Figure S7.** Cumulative risk of UTI with and without MetS (stabilized IPW weights)

**Figure S8.** Cumulative risk of UTI with and without MetS (Model 3 adjusted)

**Figure S9.** Cumulative risk of UTI with and without MetS, stratified by UTI subtypes (UUTI, LUTI and UTI, NOS) (stabilized IPW weights)

**Figure S10.** Cumulative risk of UTI with and without MetS, stratified by UTI subtypes (UUTI, LUTI and UTI, NOS) (Model 3 adjusted)

**Figure S11.** Cumulative risk of UTI by nMetS (0–5) (Model 3 adjusted)

**Figure S12.** Association between MetS and UTI Risk by Follow-up Period (stabilized IPW weights and Model 3 adjusted)

**Figure S13.** Association between nMetS and UTI risk (stabilized IPW weights and Model 3 adjusted)

**Figure S14.** Association between nMetS and UTI Risk stratified by UTI subtypes (UUTI, LUTI and UTI, NOS) (stabilized IPW weights)

**Figure S15.** Association between nMetS and UTI Risk stratified by UTI subtypes (UUTI, LUTI and UTI, NOS) (Model 3 adjusted)

**Figure S16.** Association of Metabolic, Anthropometric, and Biochemical Parameters with UTI Risk: Per-Unit Increment Analyses (Model 3 adjusted)

**Figure S17.** Association of Metabolic, Anthropometric, and Biochemical Parameters with UTI Risk: Restricted Cubic Spline Analyses (Model 3 adjusted)

**Figure S18.** Subgroup Analysis of UTI Risk Stratified by Demographic and Lifestyle Factors: Interaction Tests Based on IPW-Adjusted HR

**Figure S19.** Subgroup Analysis of UTI Risk Stratified by Demographic and Lifestyle Factors: Interaction Tests Based on Model 3-Adjusted HR

**Figure S20.** Mediation Analyses of MetS Associated Metabolic and Biochemical Parameters with UTI Risk: Model 3 Adjusted HR

**Table S1.** Classification of UTI subtypes and corresponding ICD‑10 codes

**Table S2.** Baseline Covariates, Categorization Criteria, and Corresponding UK Biobank Field IDs

**Table S3.** Baseline characteristics of the study population (unweighted).

**Table S4.** Baseline characteristics of the study population by UTI subtype (IPW-weighted percentages and P-values).

**Table S5.** Baseline characteristics of the study population by MetS status (IPW-weighted percentages and P-values).

**Table S6.** Baseline characteristics of the study population by nMetS (IPW-weighted percentages and P-values).

**Table S7.** Association between nMetS and UTI Risk (Model 1, 2, 3 adjusted)

**Table S8.** Association between nMetS and UTI Risk stratified by UTI subtypes (UUTI, LUTI and UTI, NOS) (Model 1, 2, 3 adjusted)

**Table S9.** Sensitivity analysis of hazard ratios (95% CI) for the risk of UTI associated with metabolic, anthropometric, and biochemical parameters (stabilized IPW weights)

**Table S10.** Sensitivity analysis of hazard ratios (95% Cl) for the risk of UTI associated with nMetS (stabilized IPW weights)

**Table S11.** Sensitivity analysis of multivariable-adjusted hazard ratios (95% Cl) for the risk of UTI associated with Metabolic, Anthropometric, and Biochemical Parameters (Model 3 adjusted)

**Table S12.** Sensitivity analysis of multivariable-adjusted hazard ratios (95% Cl) for the risk of UTI associated with nMetS (Model 3 adjusted)


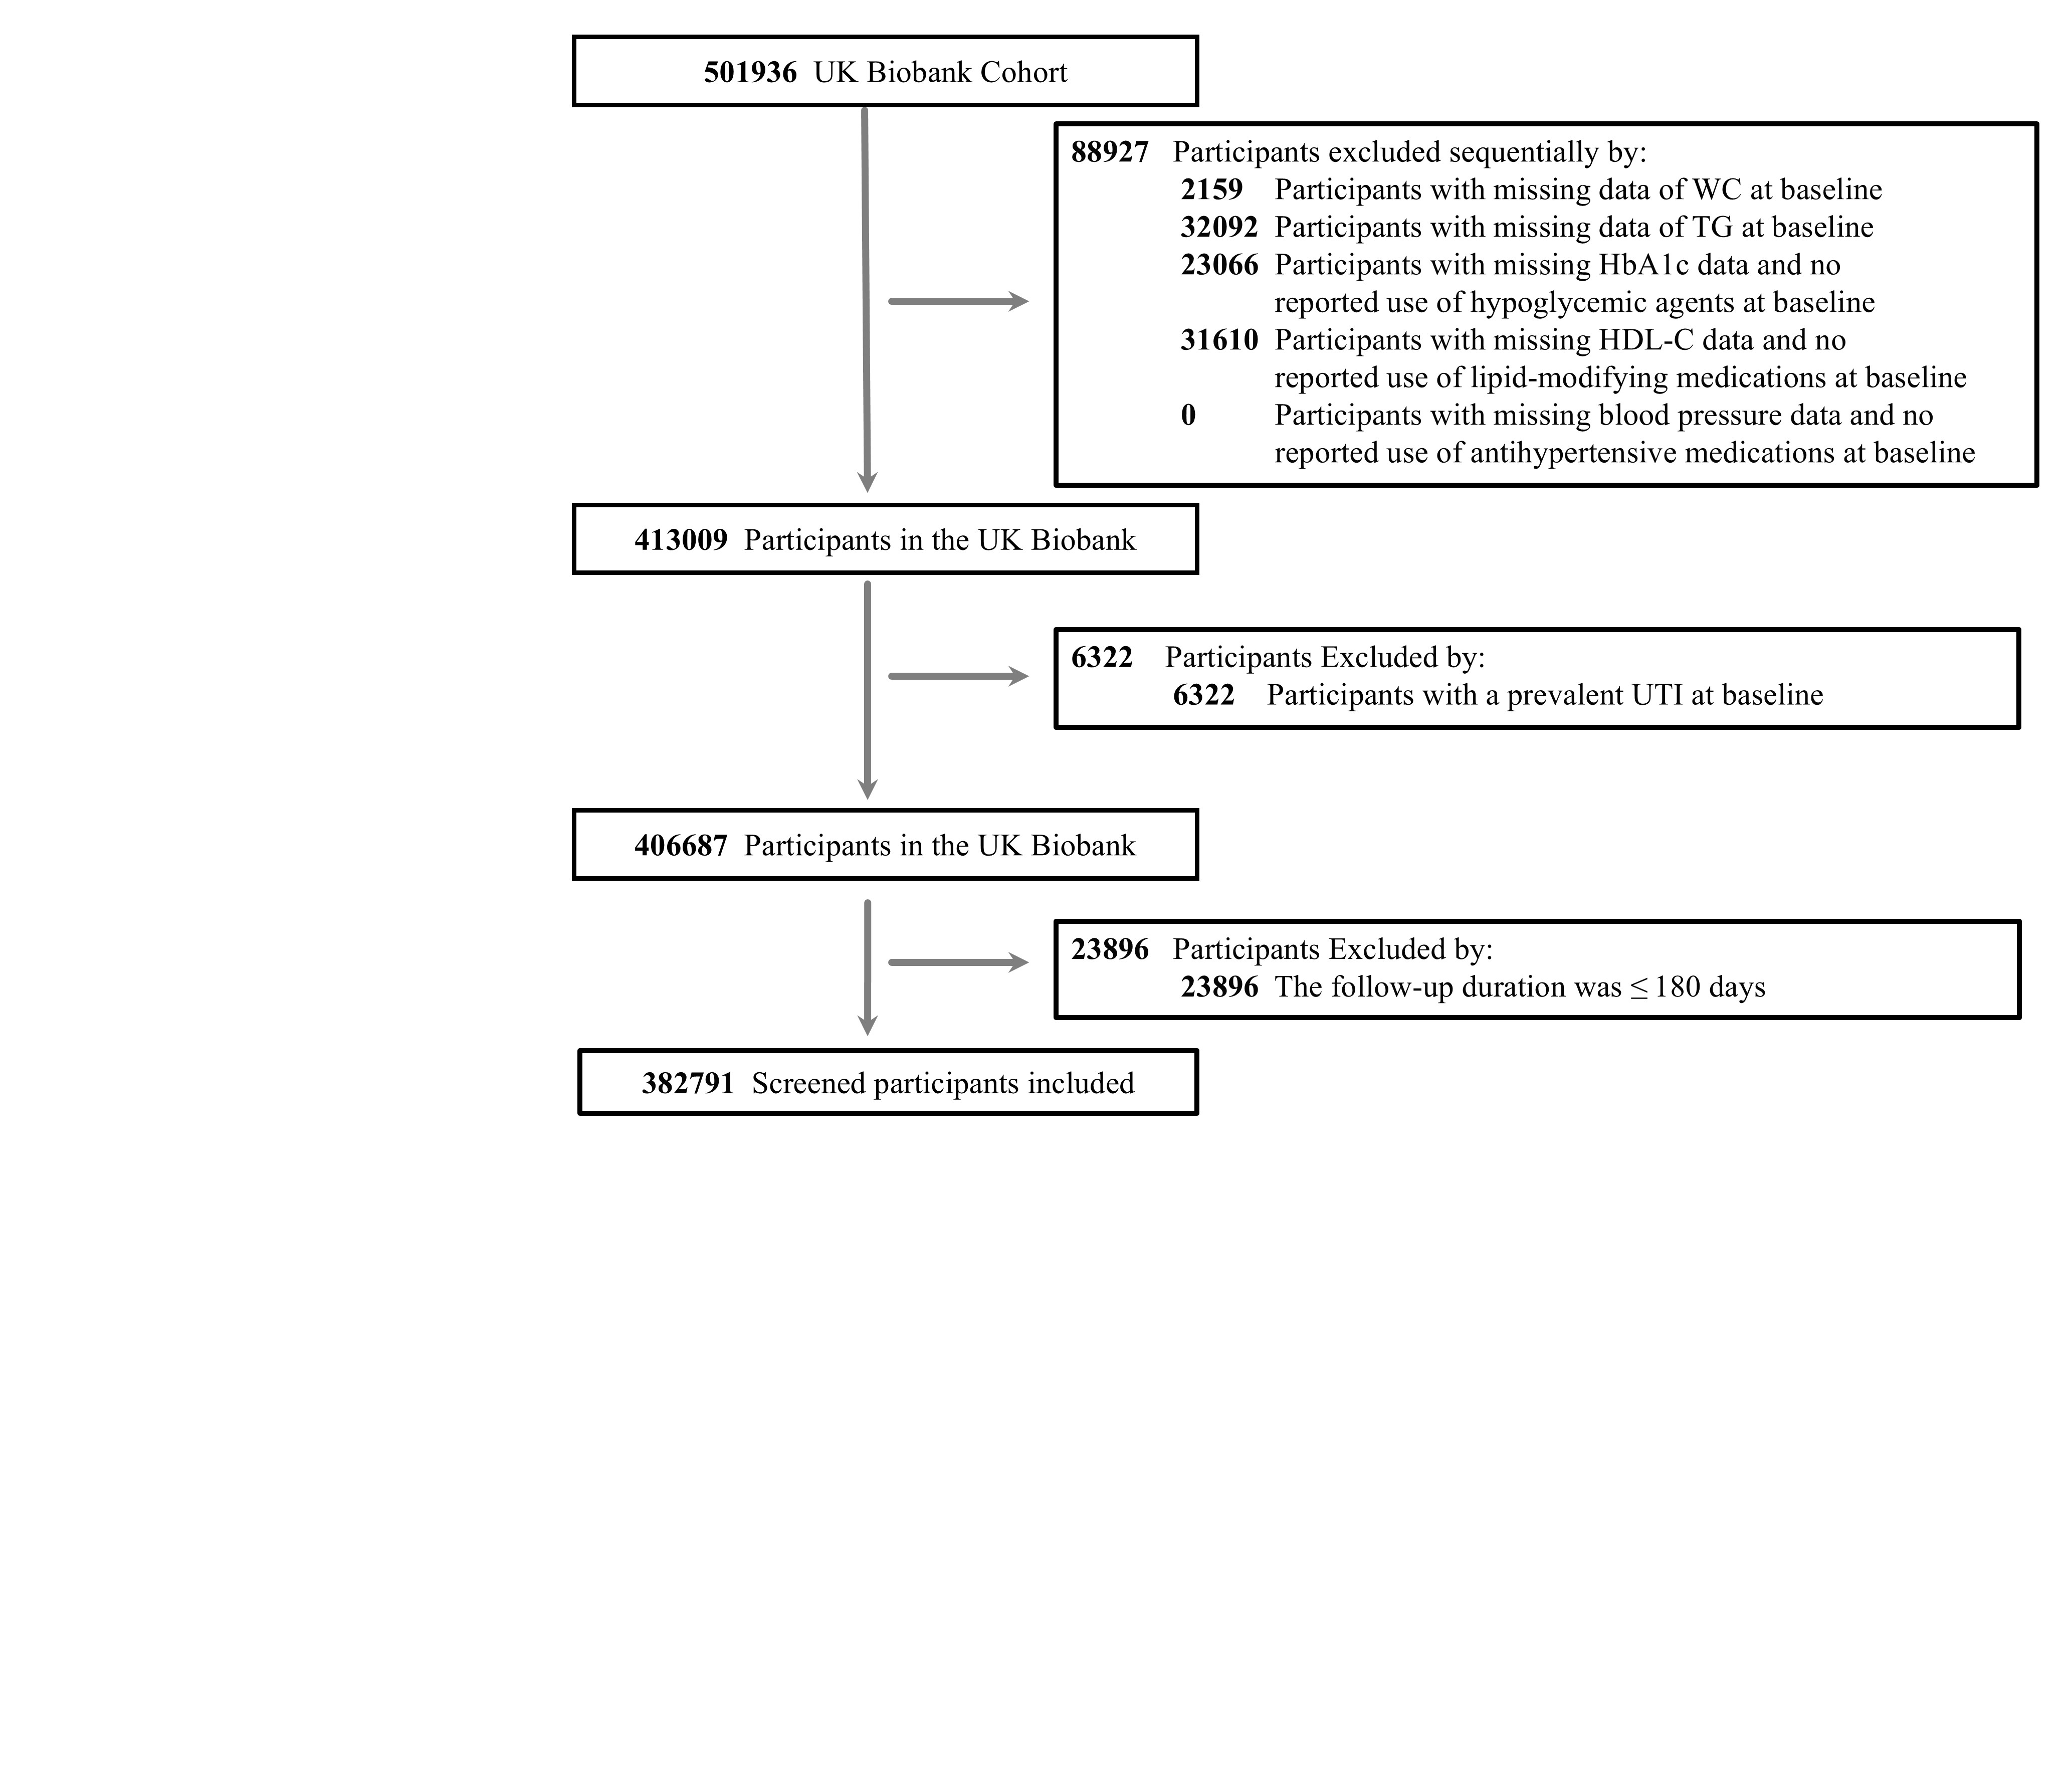


**Figure S1.** Flowchart of participant inclusion and exclusion

WC, Waist circumference; TG, Triglyceride; HbA1c, Glycosylated Hemoglobin A1c; HDL, high-density lipoprotein.


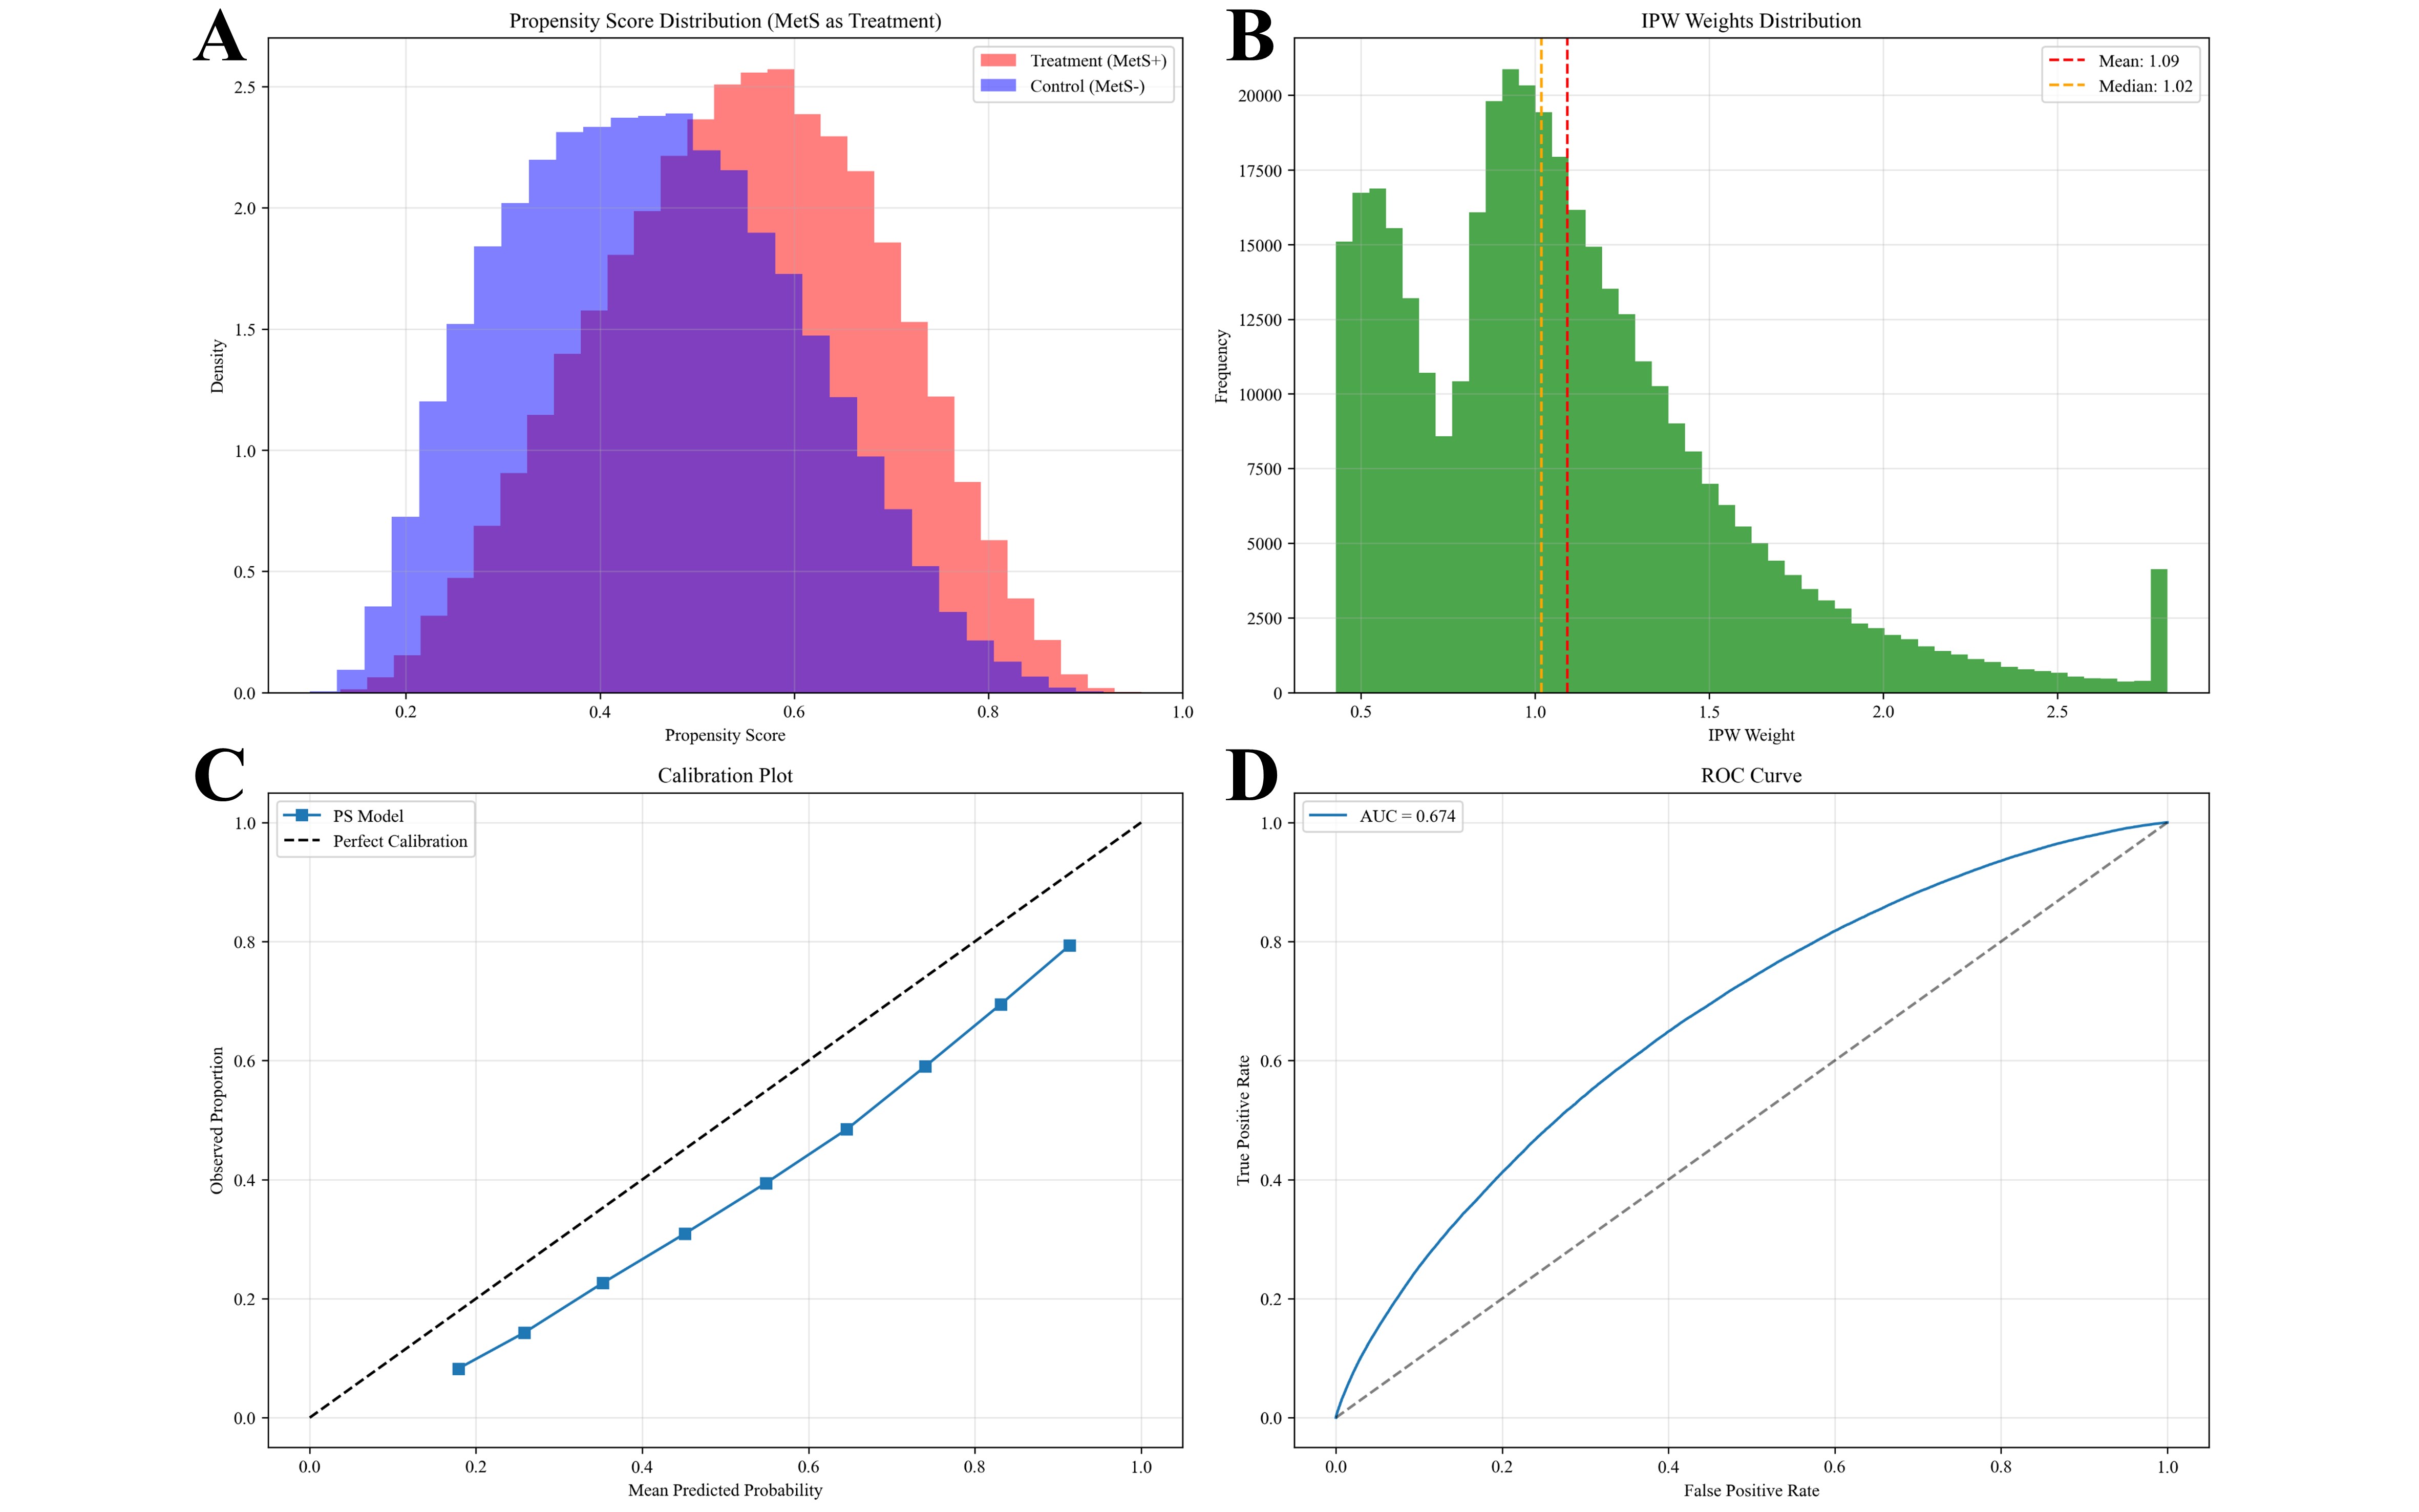


**Figure S2.** Evaluation of IPW for the Analysis of MetS and UTI Association

(A) Propensity Score Distribution (MetS as Treatment); (B) Distribution of IPW Weights; (C) Calibration Plot of the Propensity Score Model; (D) ROC Curve of the Propensity Score Model (AUC = 0.674)


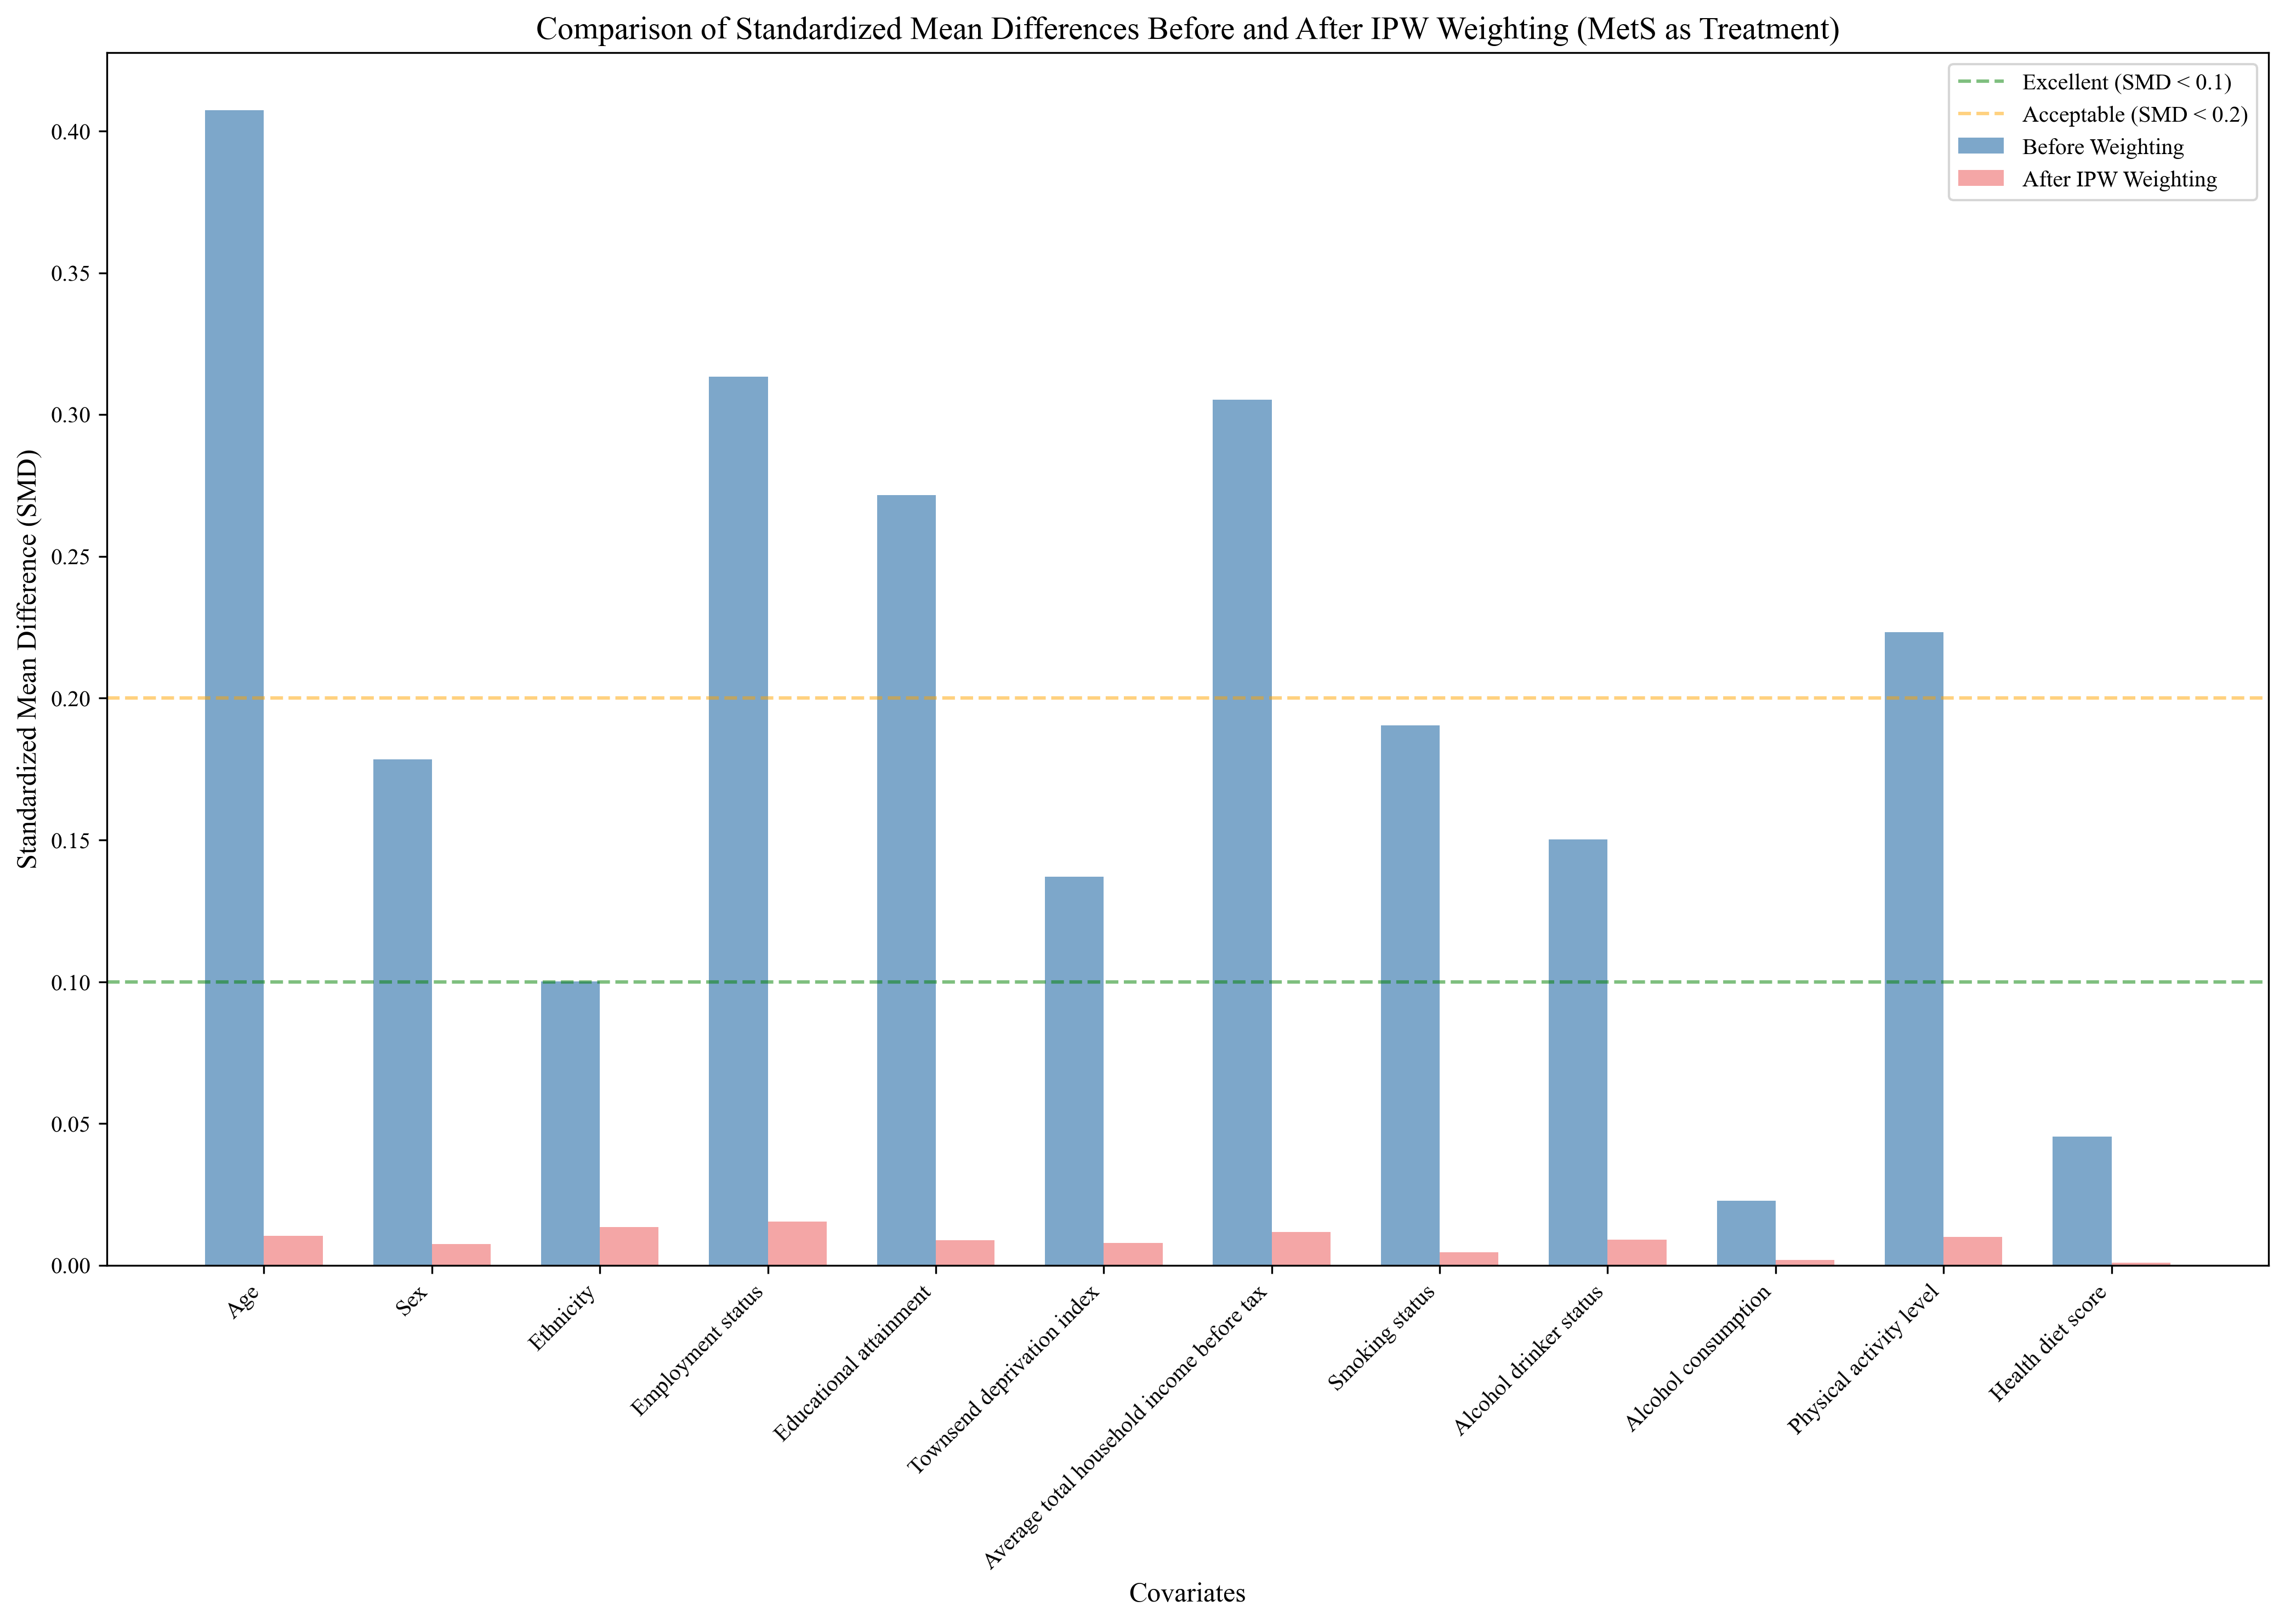


**Figure S3.** Comparison of Standardized Mean Differences Before and After IPW Weighting (MetS as Treatment)


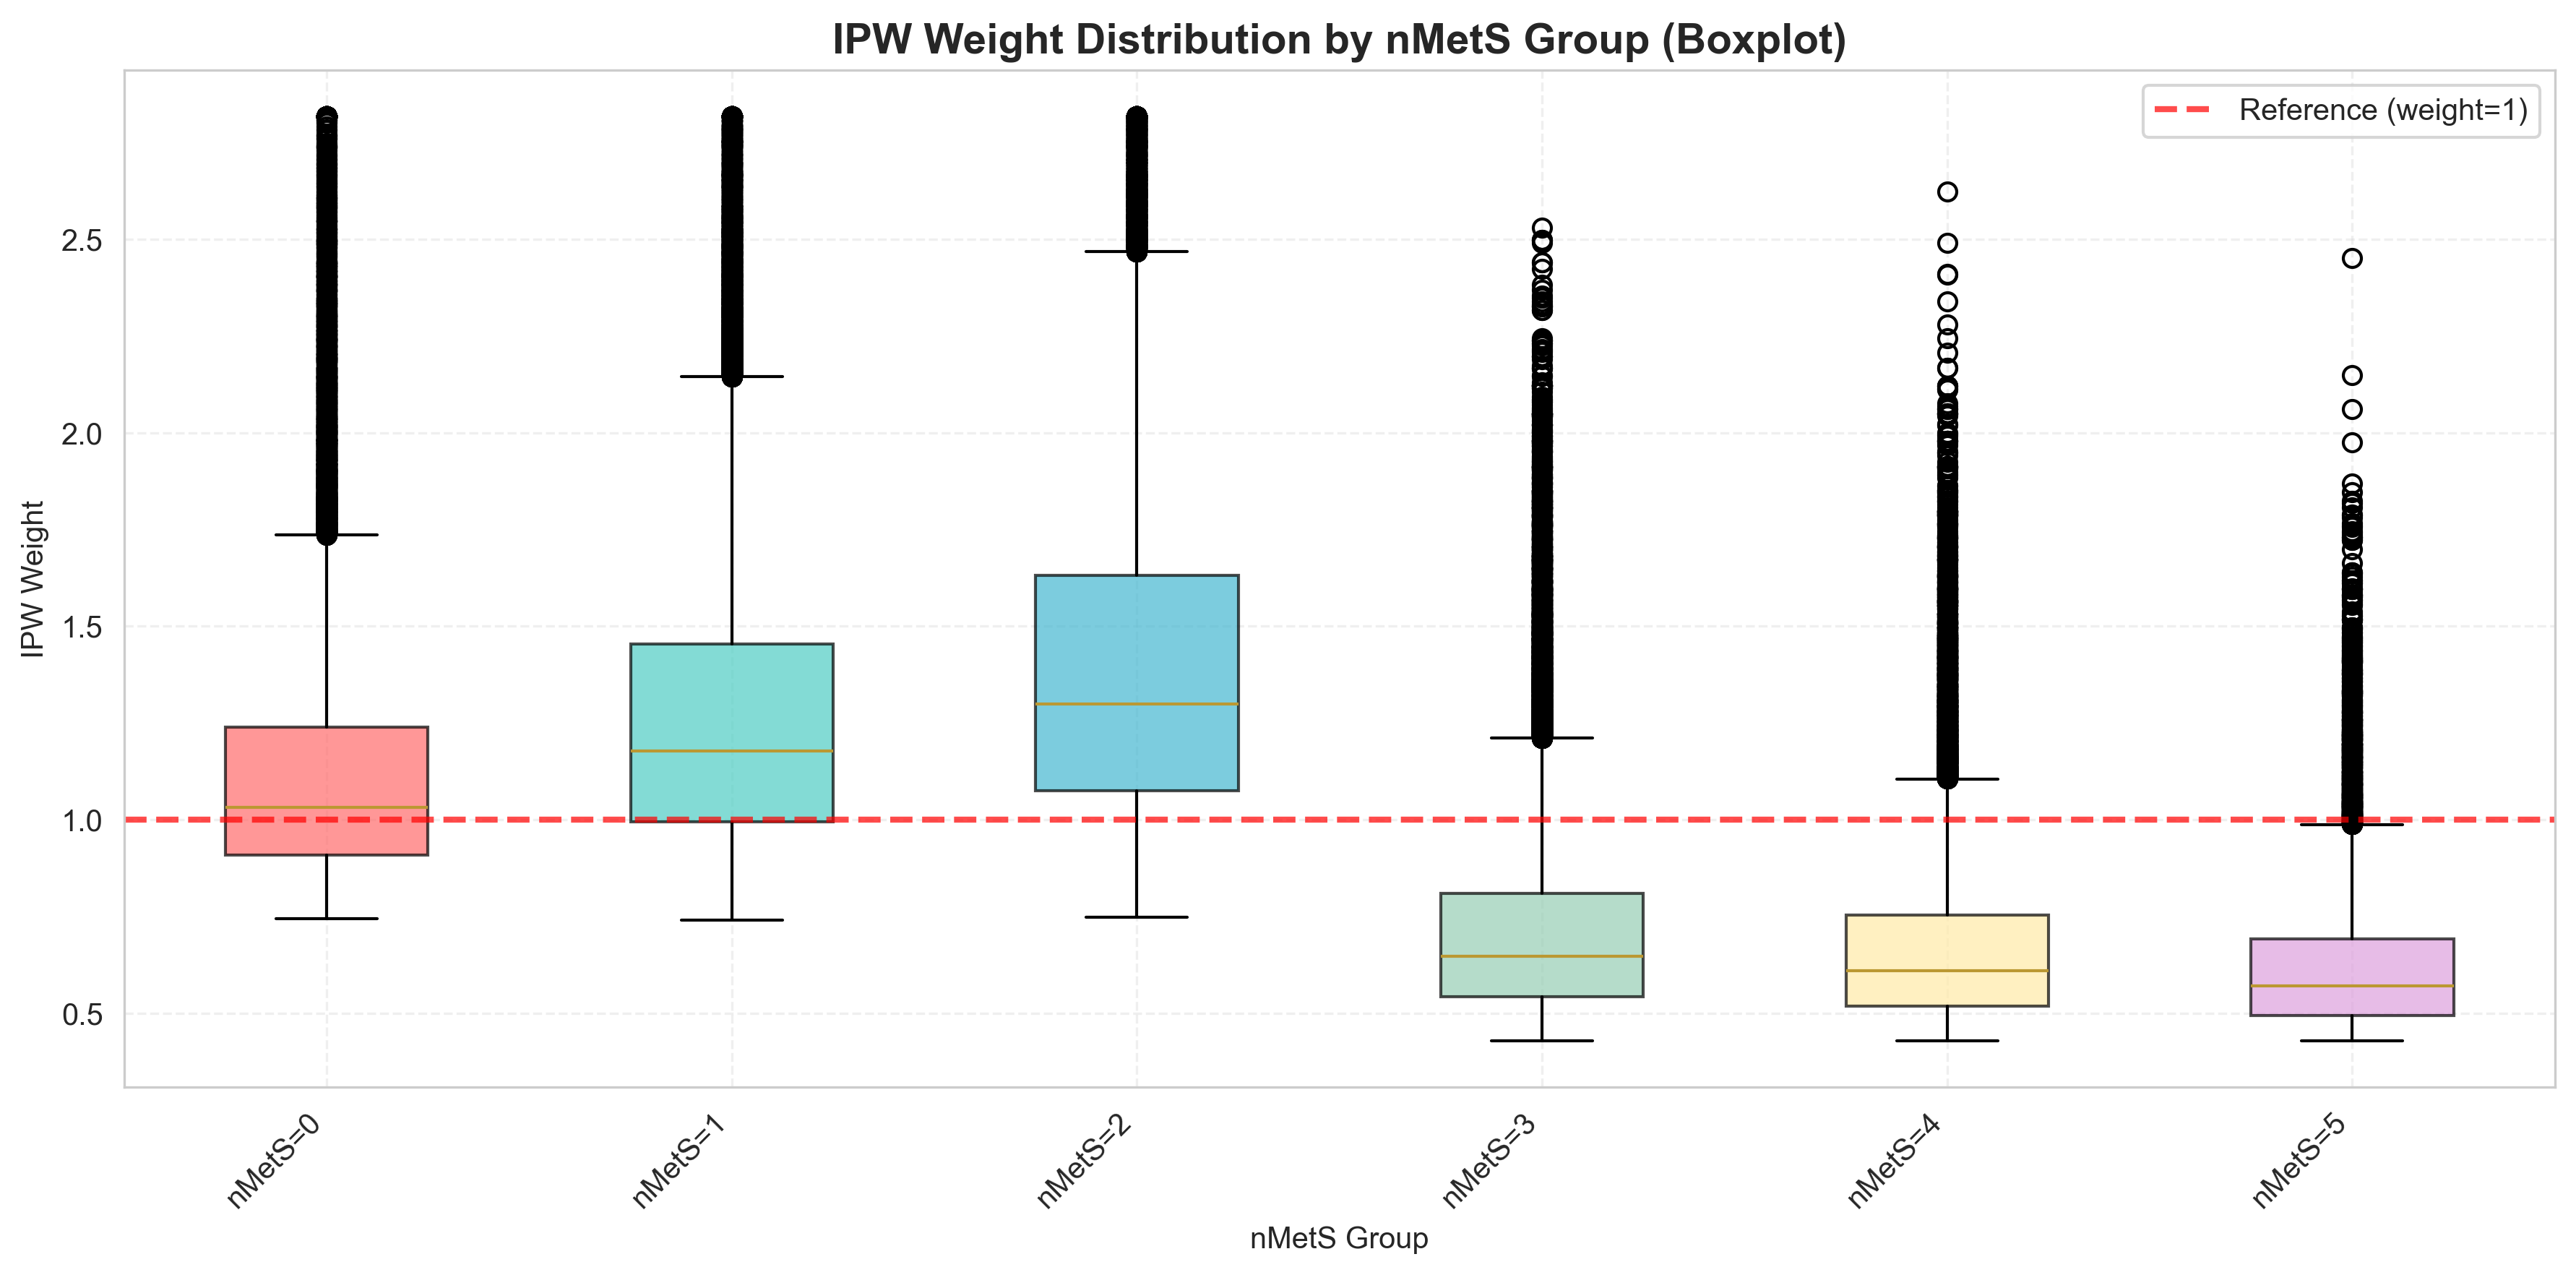


**Figure S4.** IPW Weight Boxplot by nMetS Subgroup (1%-99% Trimmed)


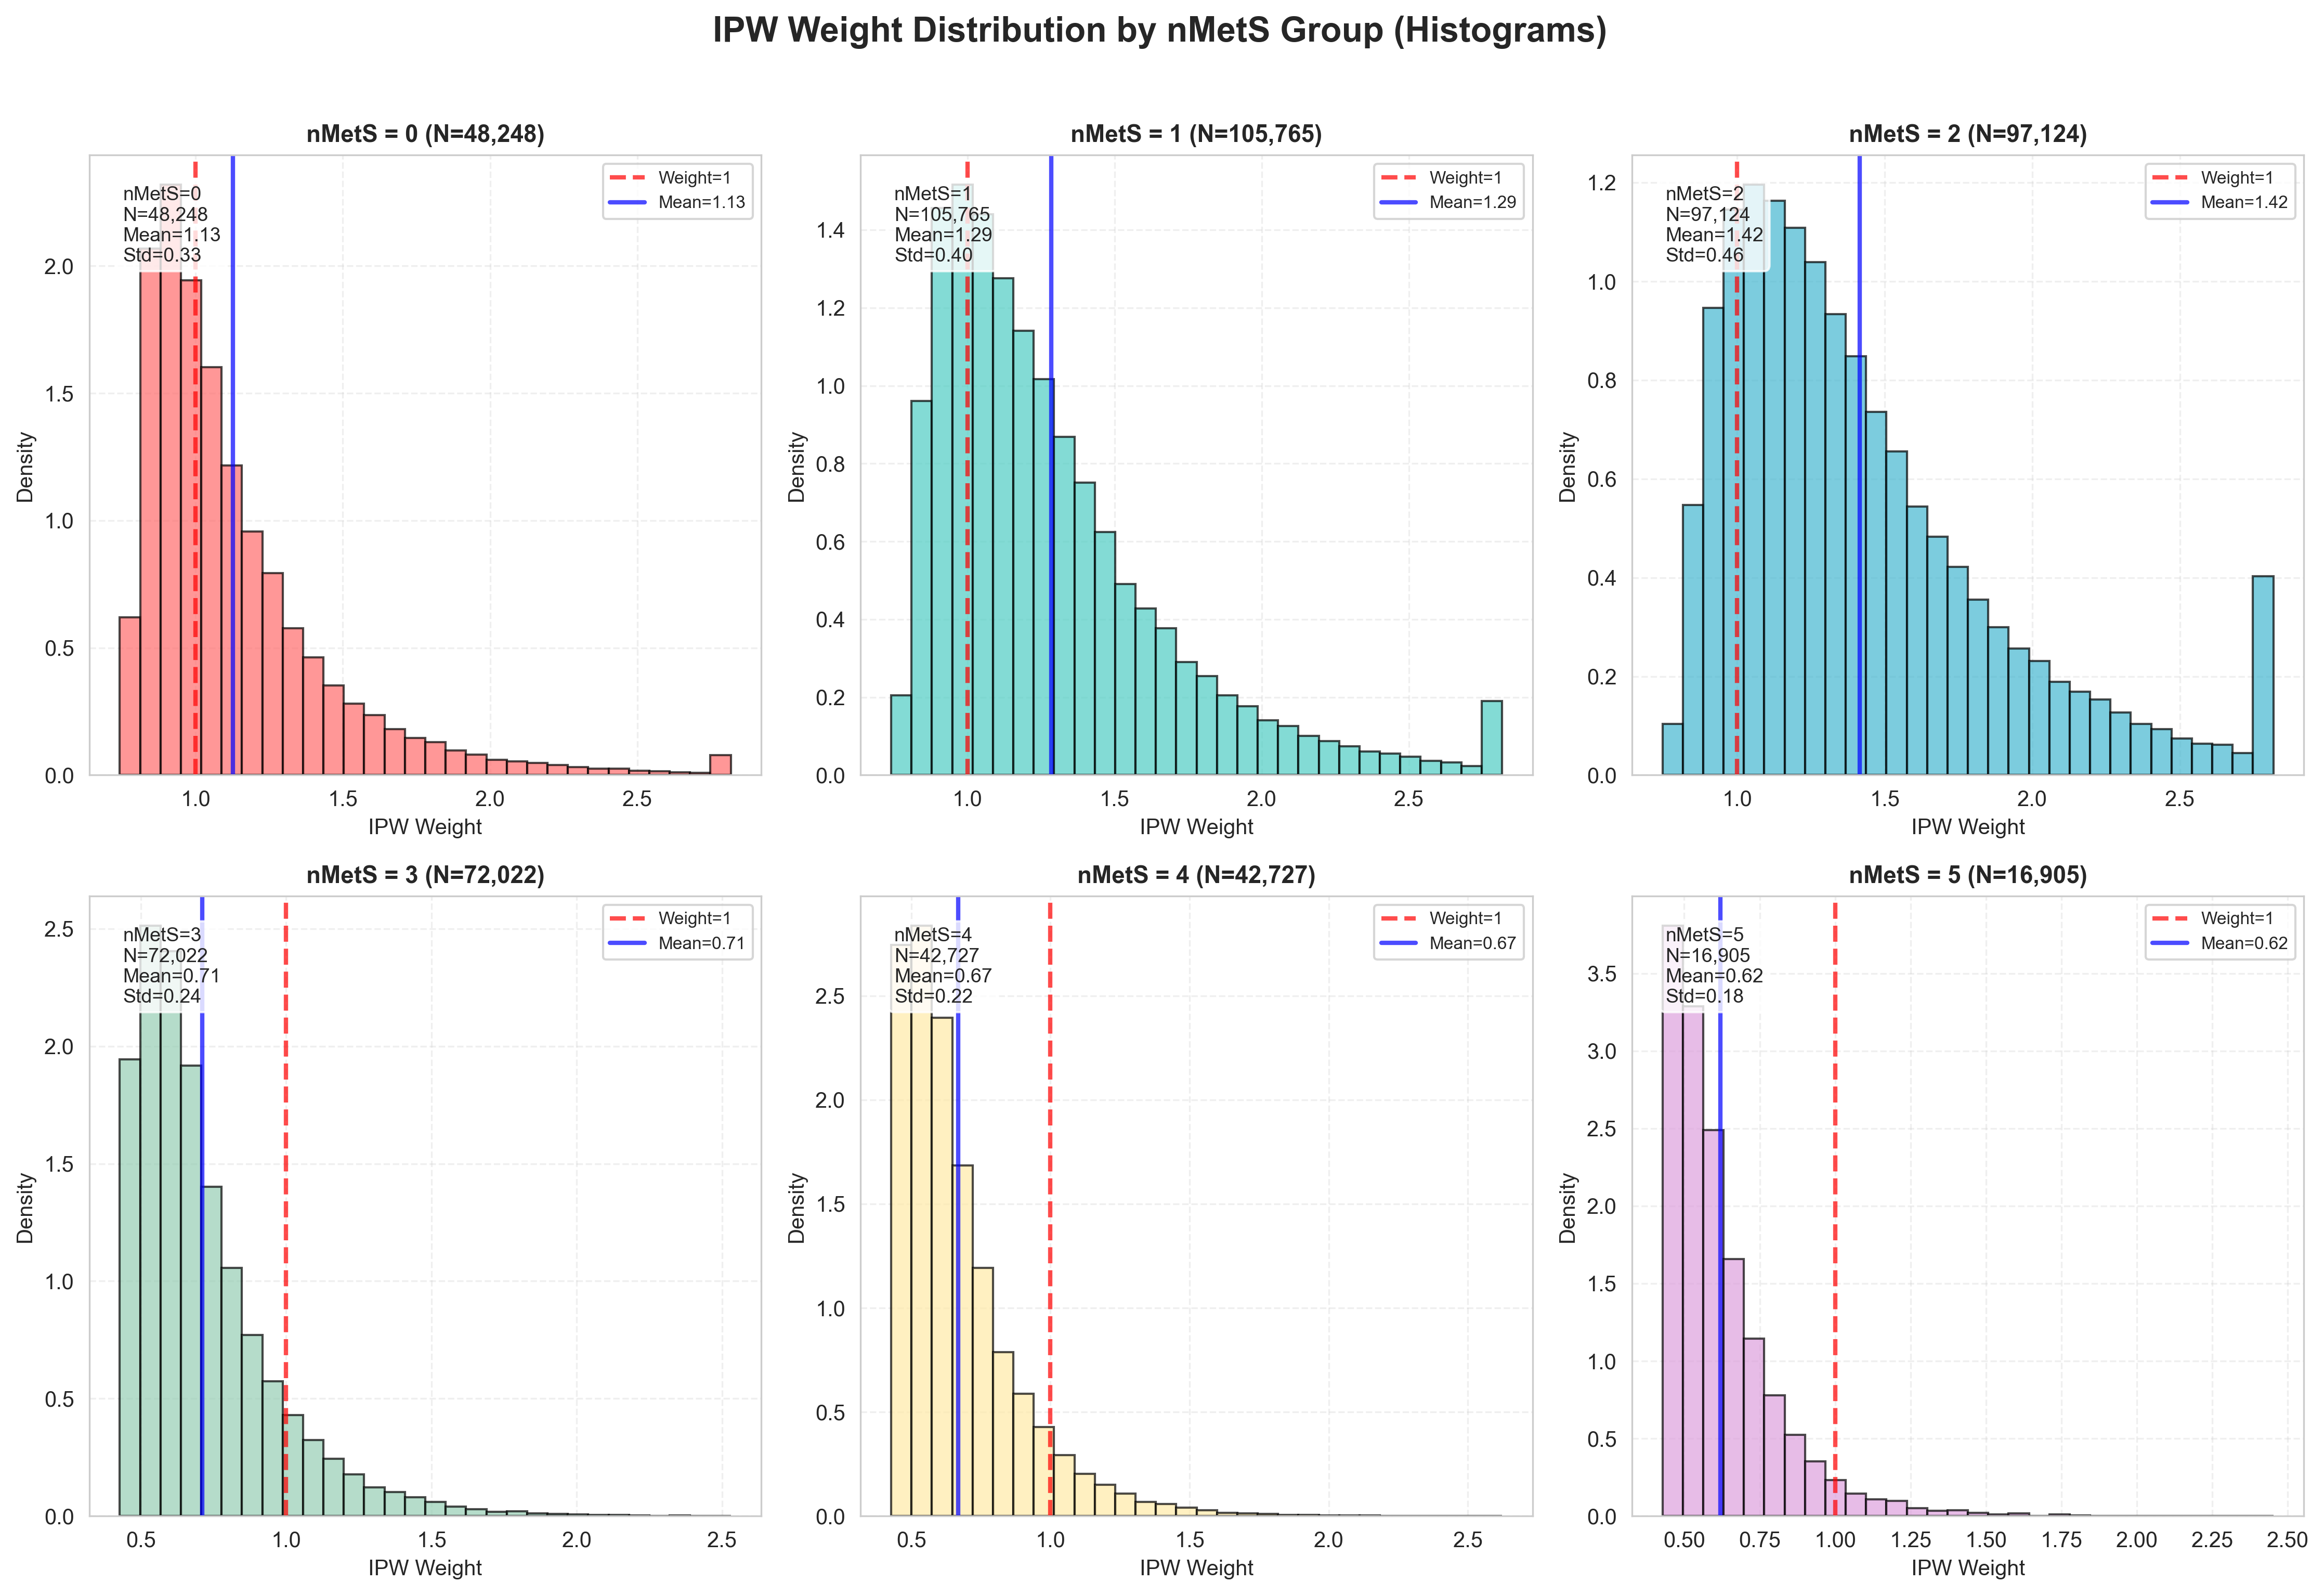


**Figure S5.** IPW Weight Distribution Histogram by nMetS Subgroup (1%-99% Trimmed)





**Figure S6.** Association Between nMetS and UTI Risk: A Comprehensive Visual Analysis with Stabilized IPW

(A) Dose-Response Relationship Between nMetS and UTI Risk; (B) Subgroup Analysis of the Association Between nMetS and UTI Risk; (C) Time-Dependent Effect of nMetS on UTI Risk During Follow-Up; (D) Piecewise Hazard Ratio Analysis of nMetS and UTI Risk by Follow-Up Period; (E) Population Attributable Risk (PAR) of UTI Associated With nMetS; (F) Number Needed to Treat (NNT) Analysis for UTI Prevention in High-Risk MetS Groups; (G) Sensitivity Analysis: Impact of IPW Weight Standardization on Effect Estimates; (H) Landmark Analysis of nMetS and UTI Risk at Different Follow-Up Time Points; (I) Dynamic Cumulative Incidence of UTI by nMetS


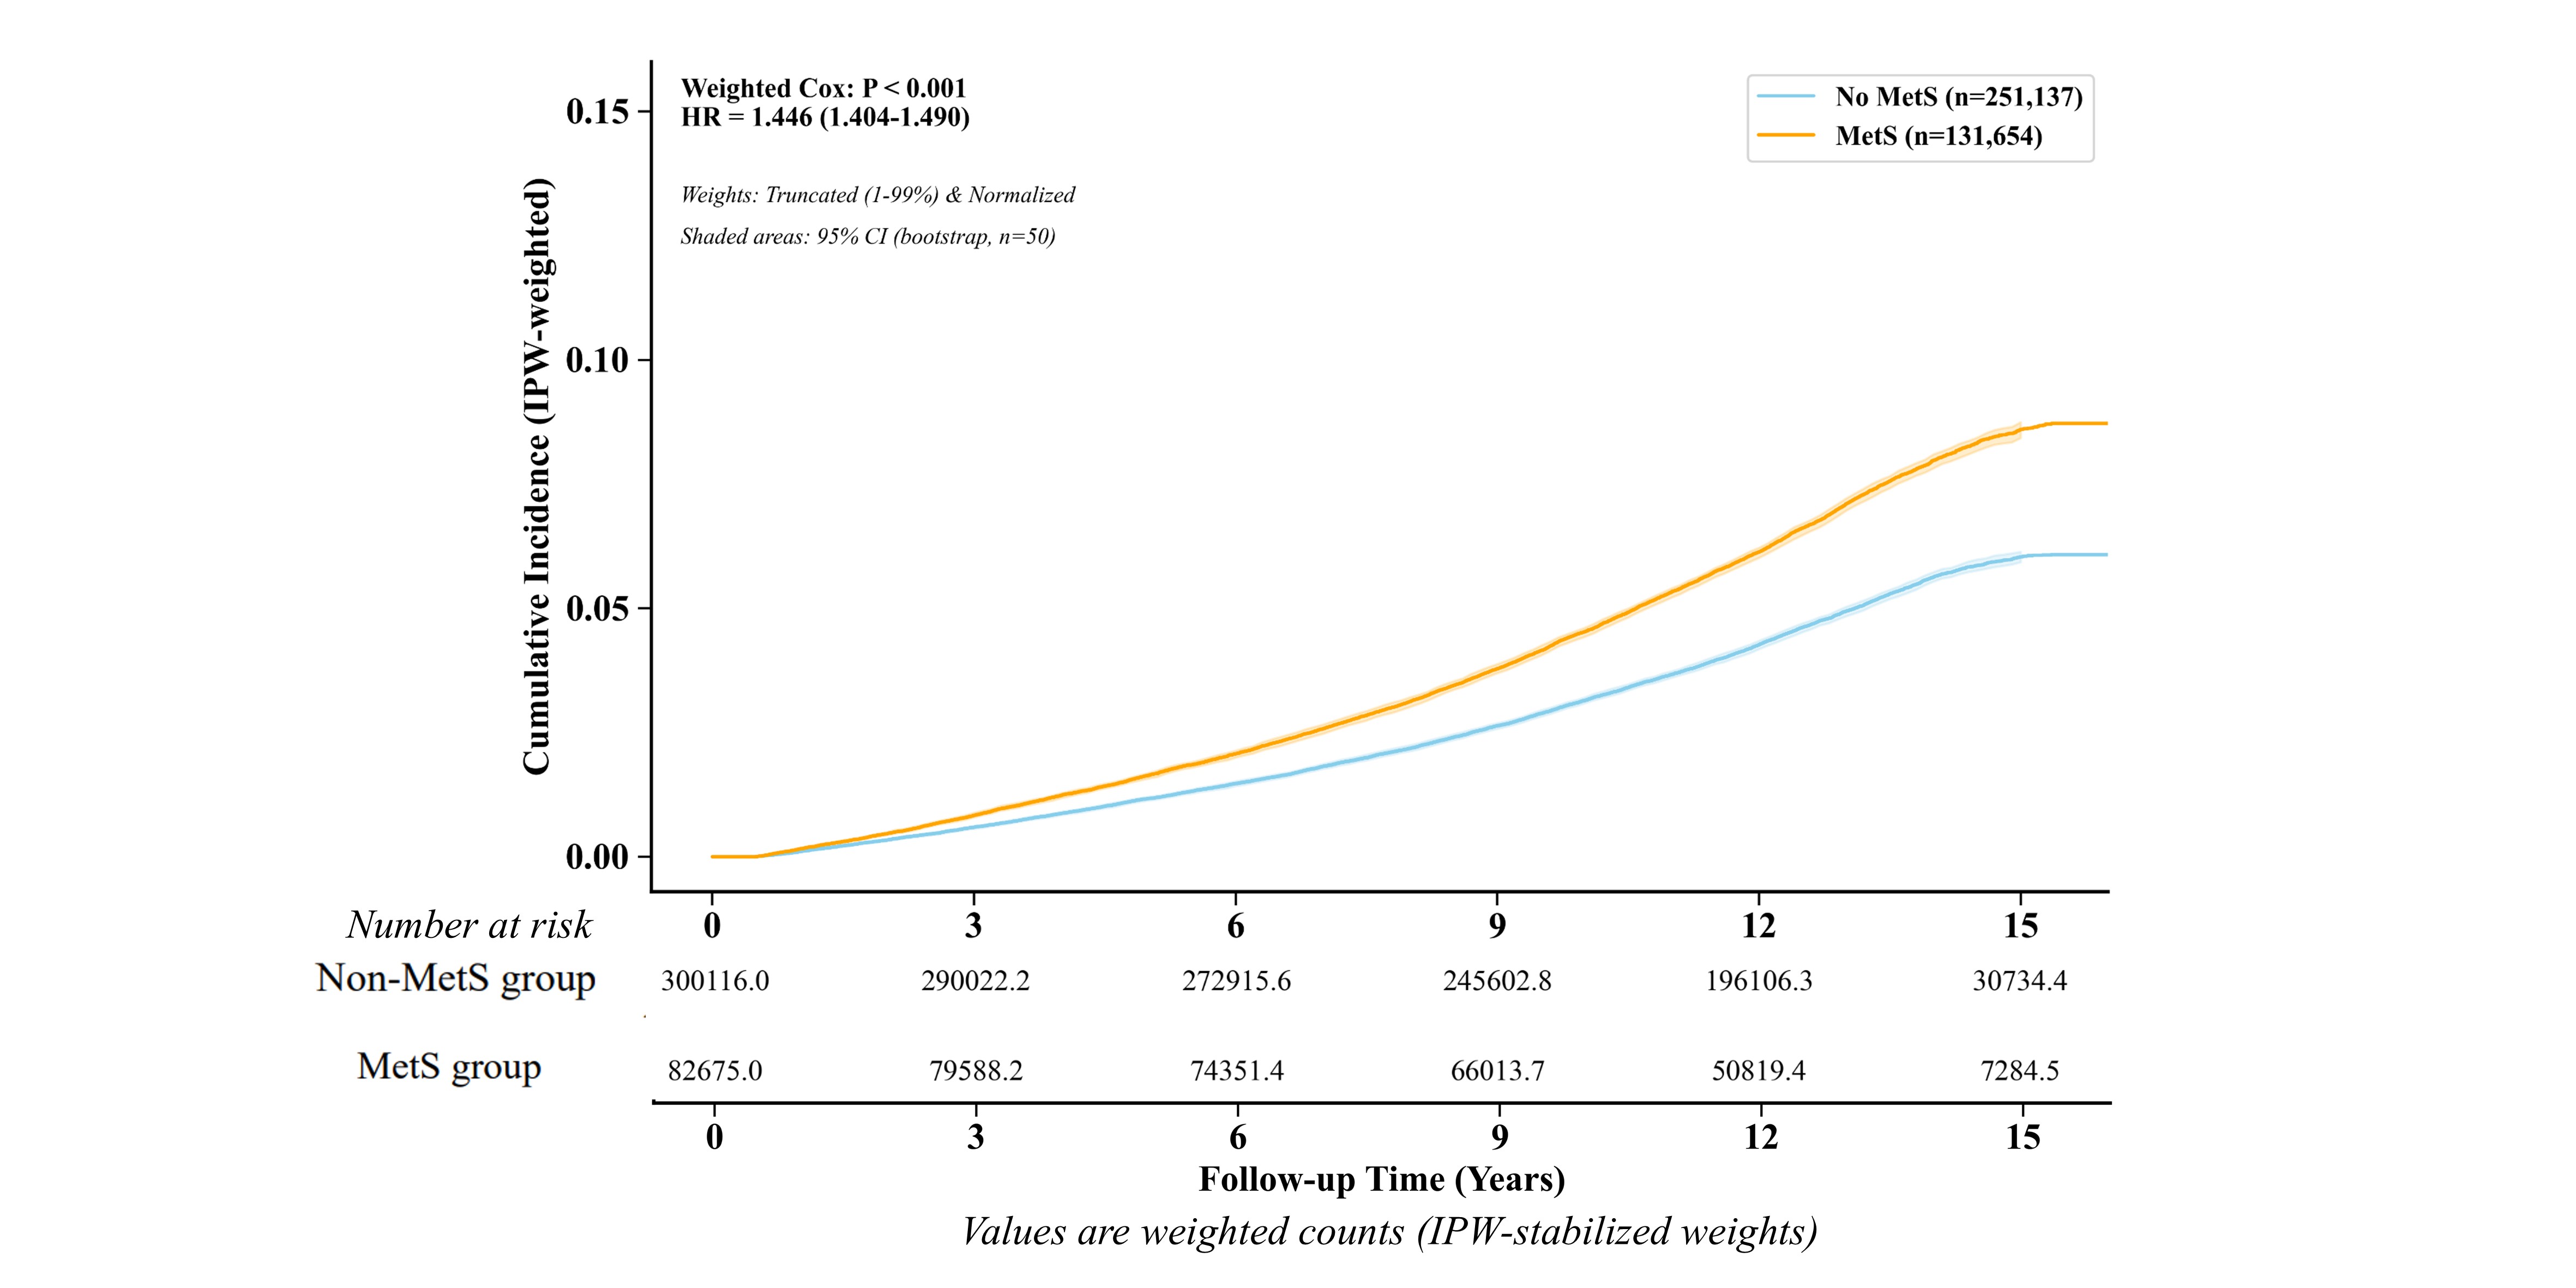


**Figure S7.** Cumulative risk of UTI with and without MetS (stabilized IPW weights)


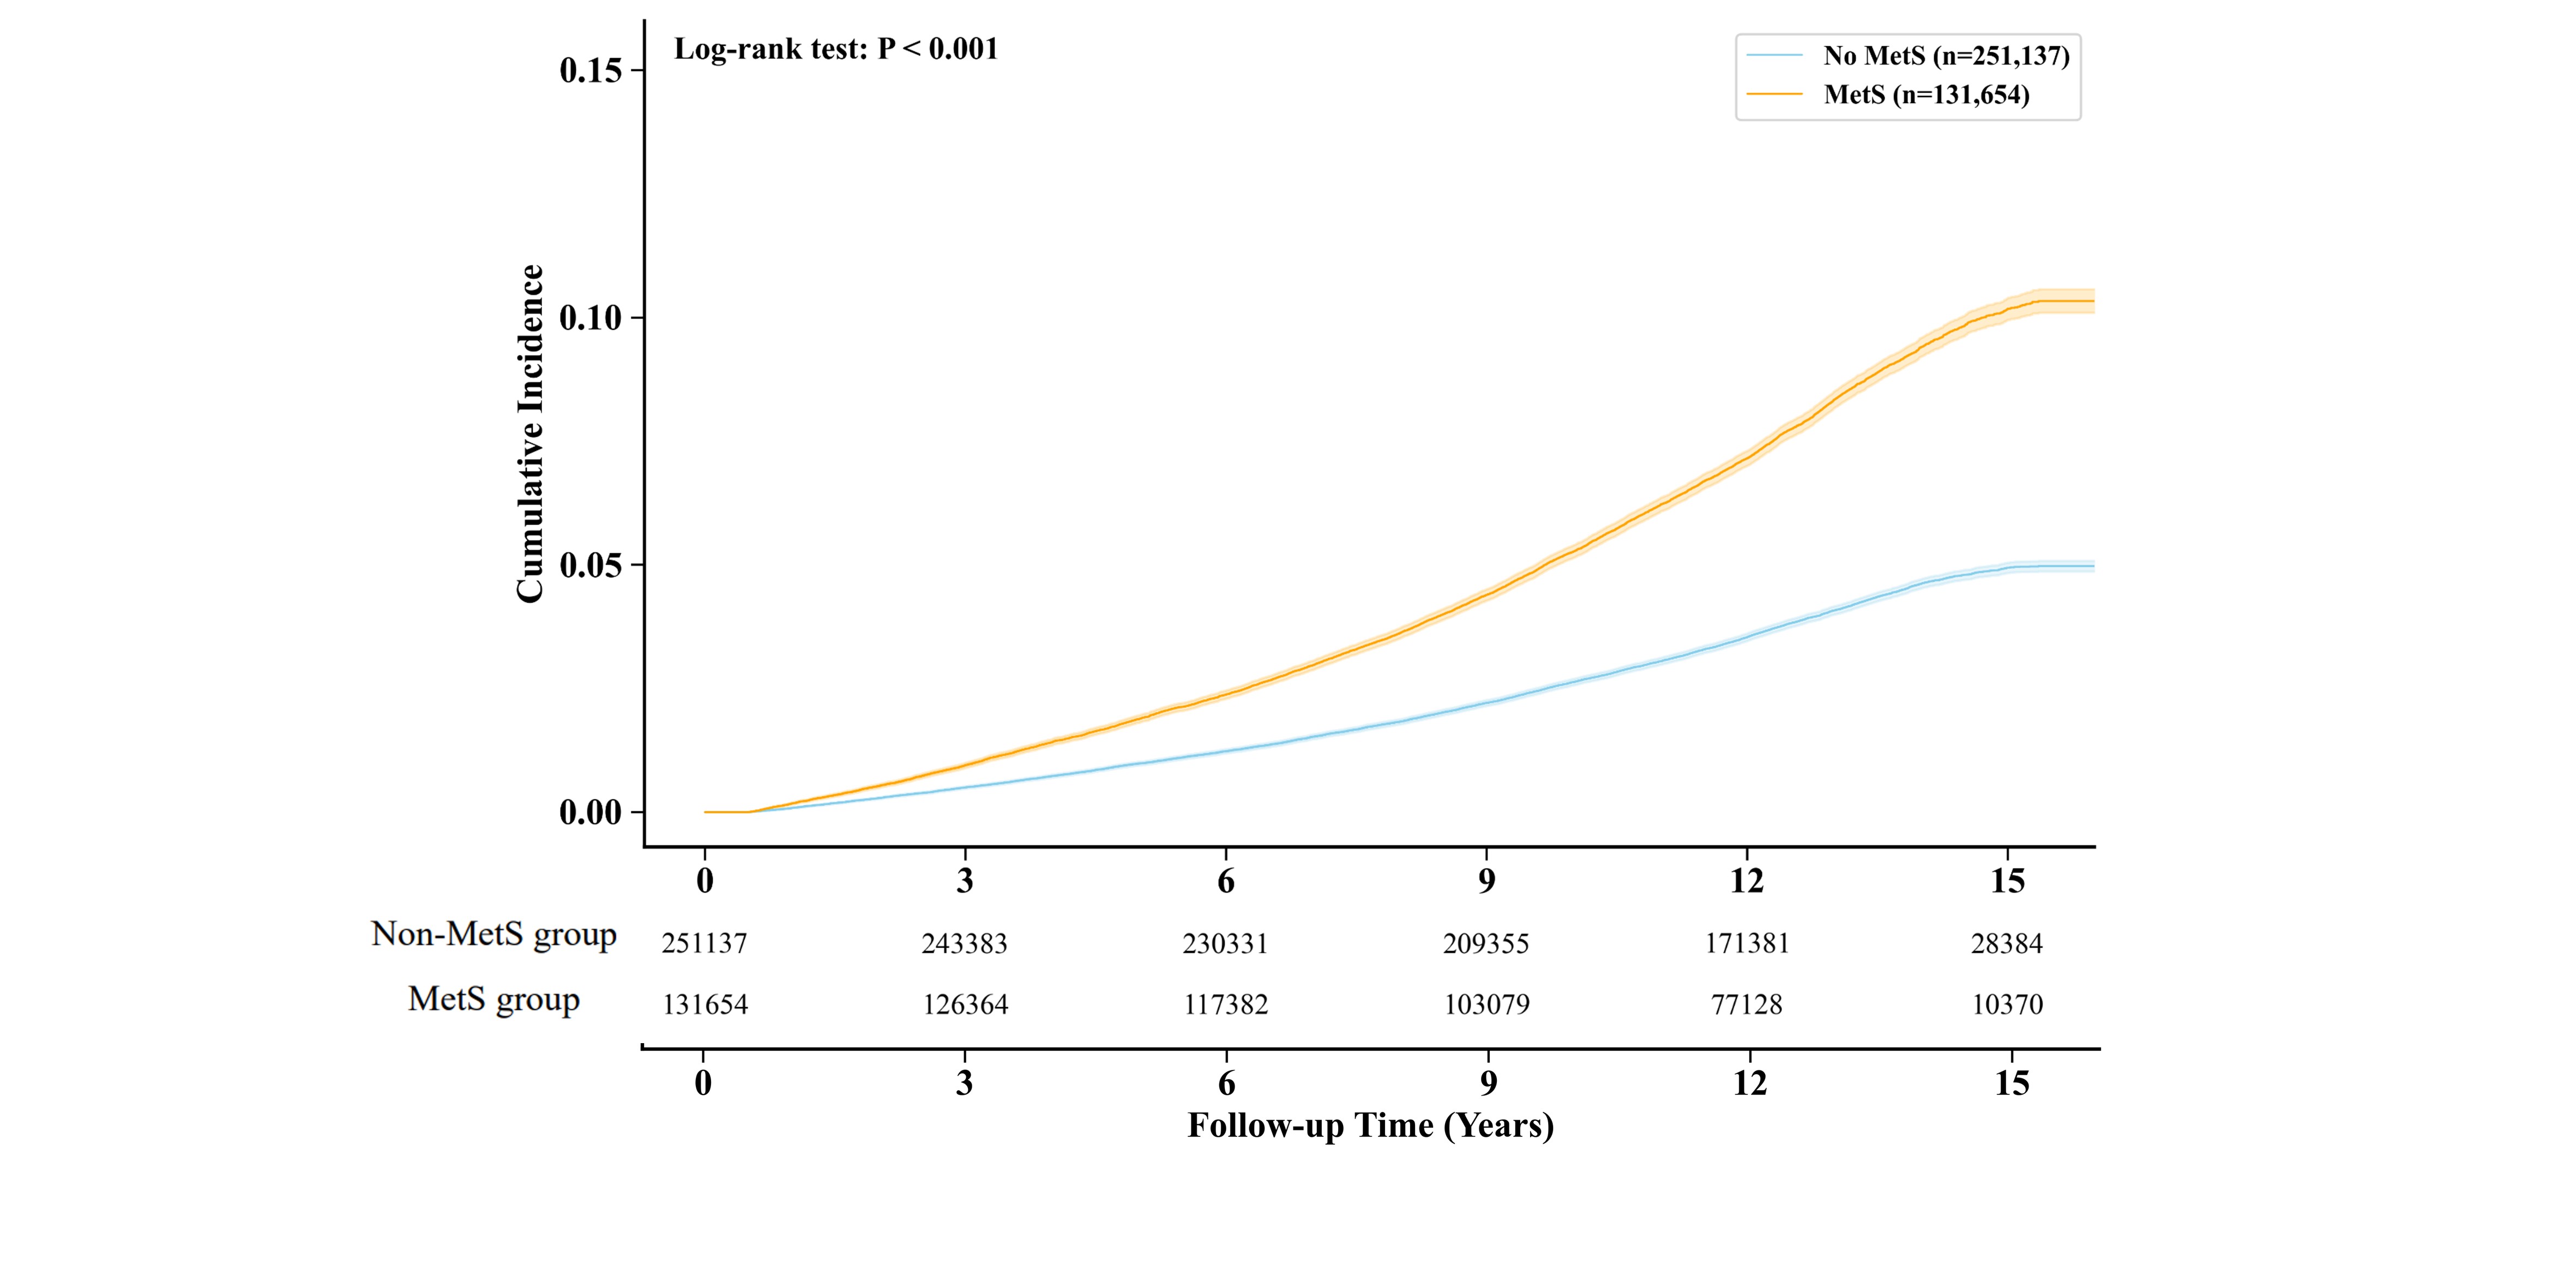


**Figure S8**. Cumulative risk of UTI with and without MetS (Model 3 adjusted)


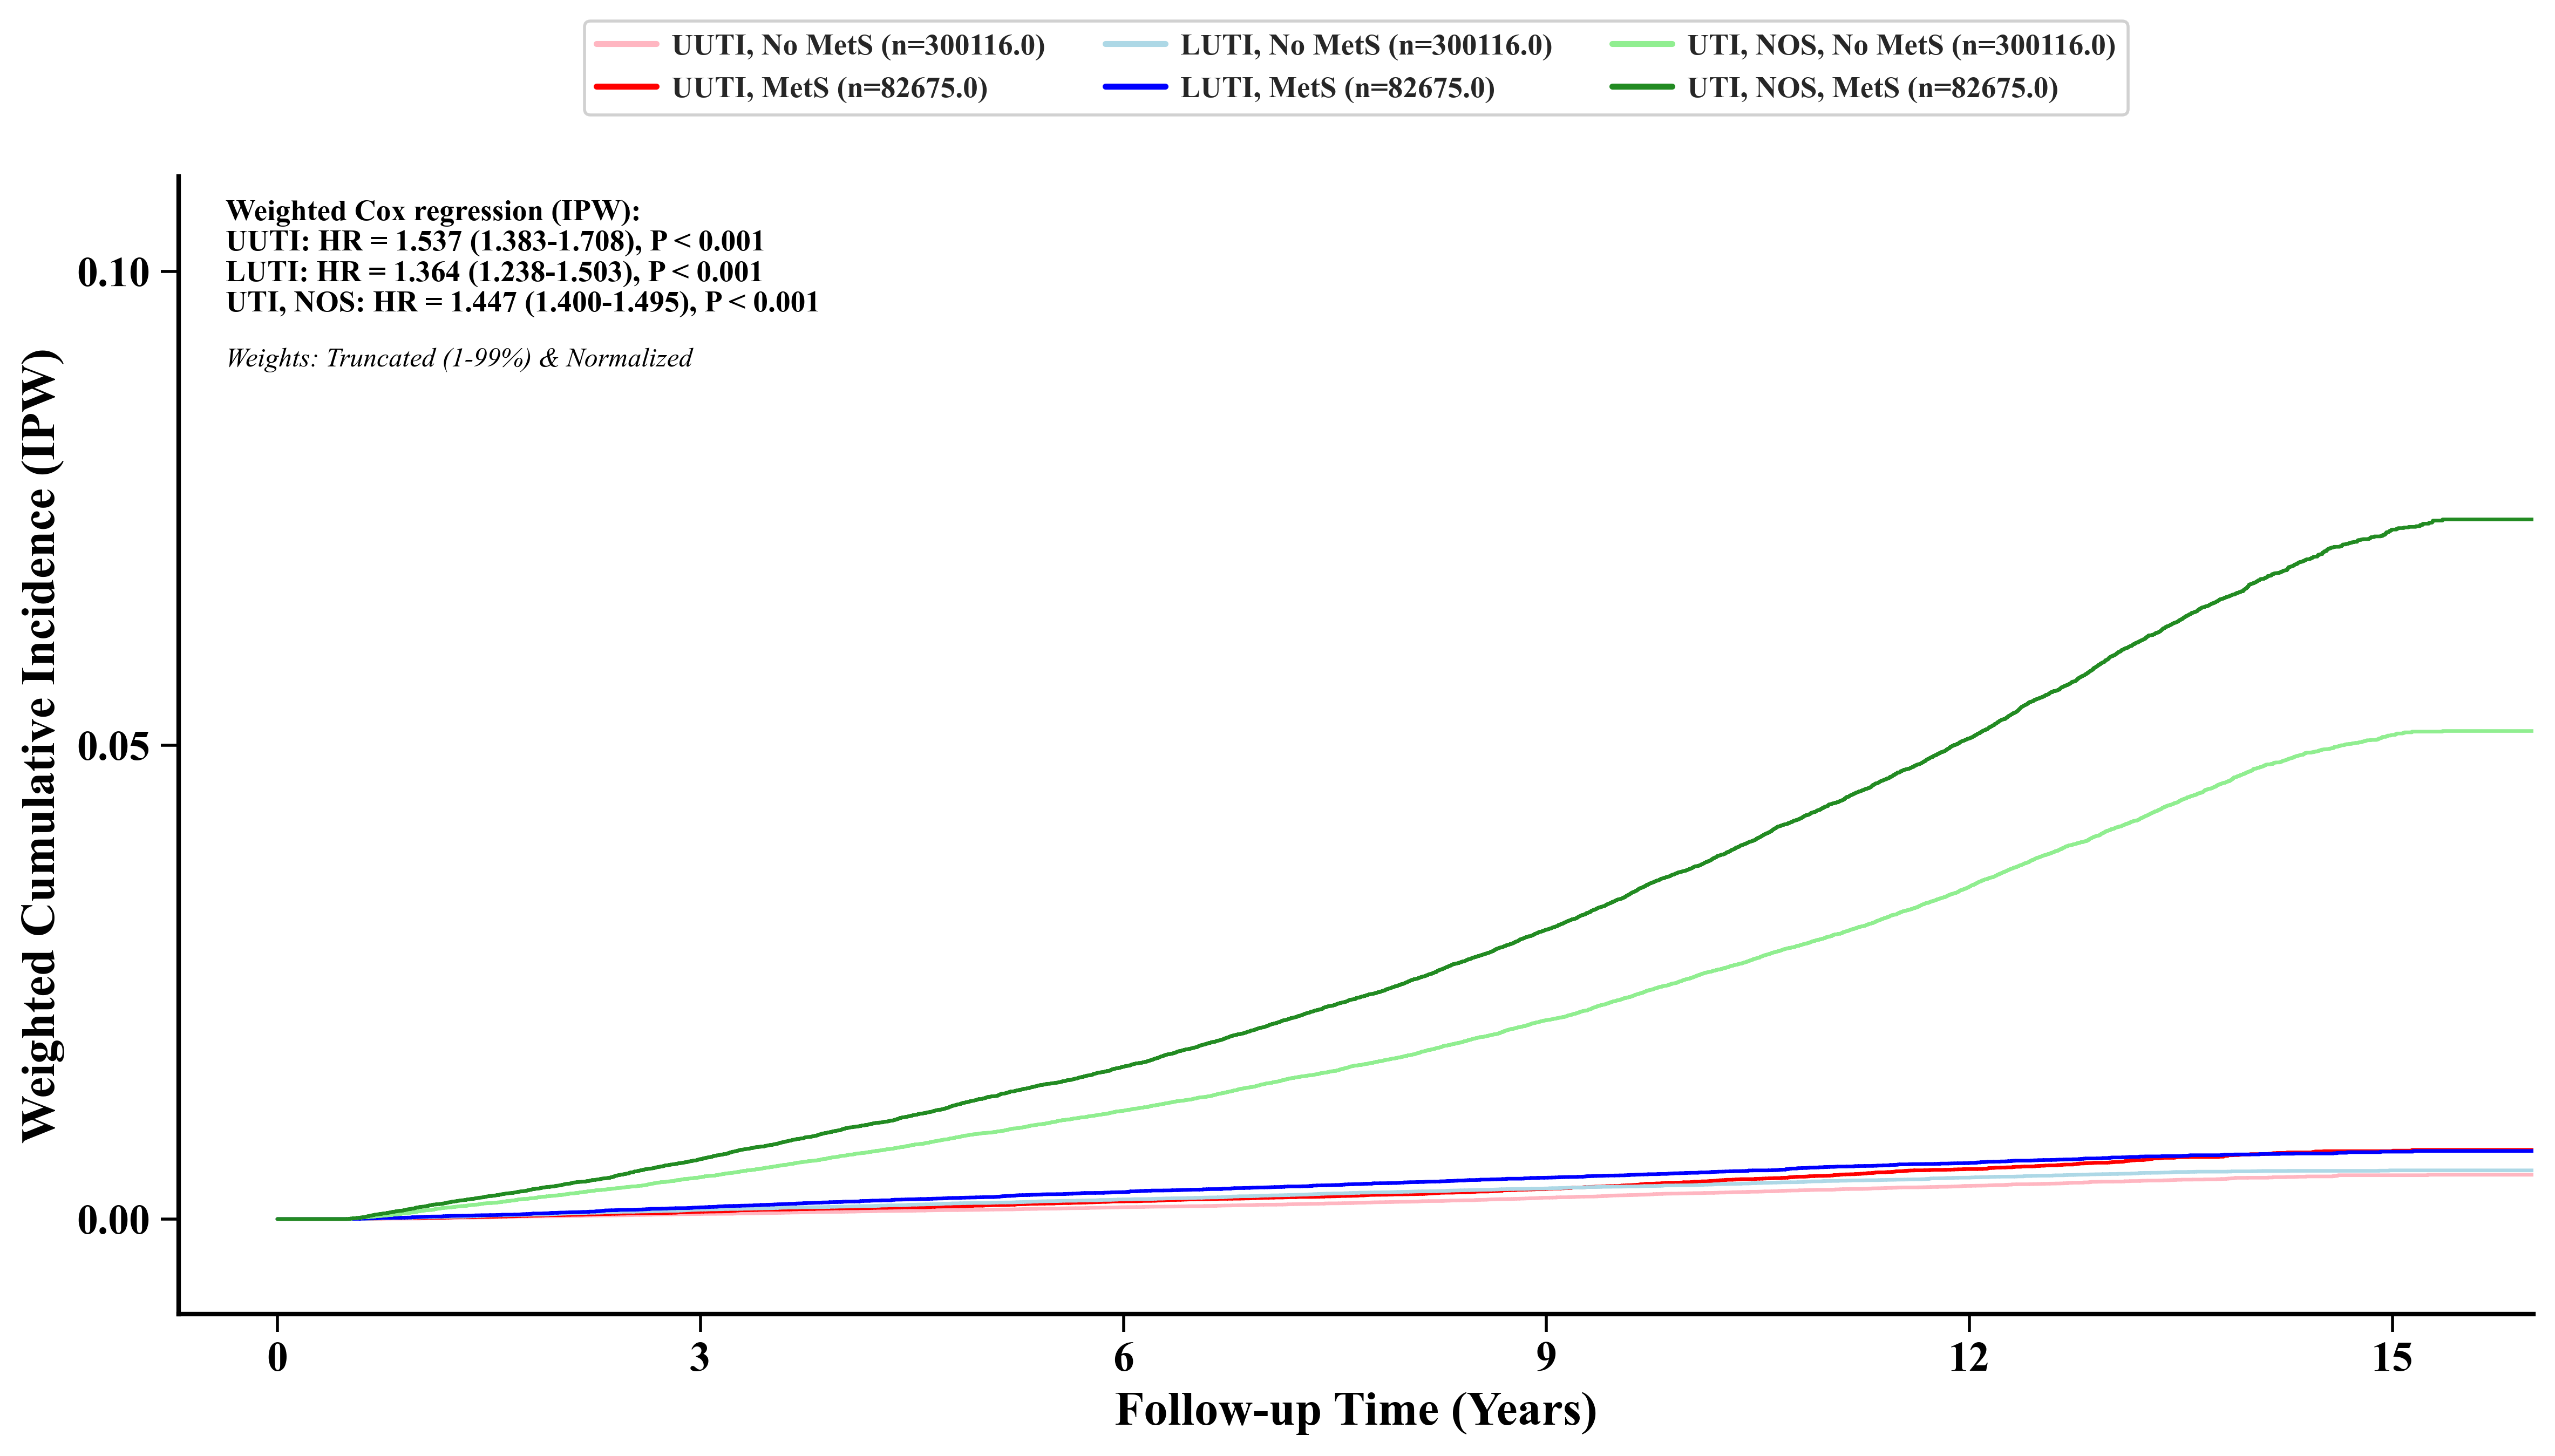


**Figure S9.** Cumulative risk of UTI with and without MetS, stratified by UTI subtypes (UUTI, LUTI and UTI, NOS) (stabilized IPW weights)


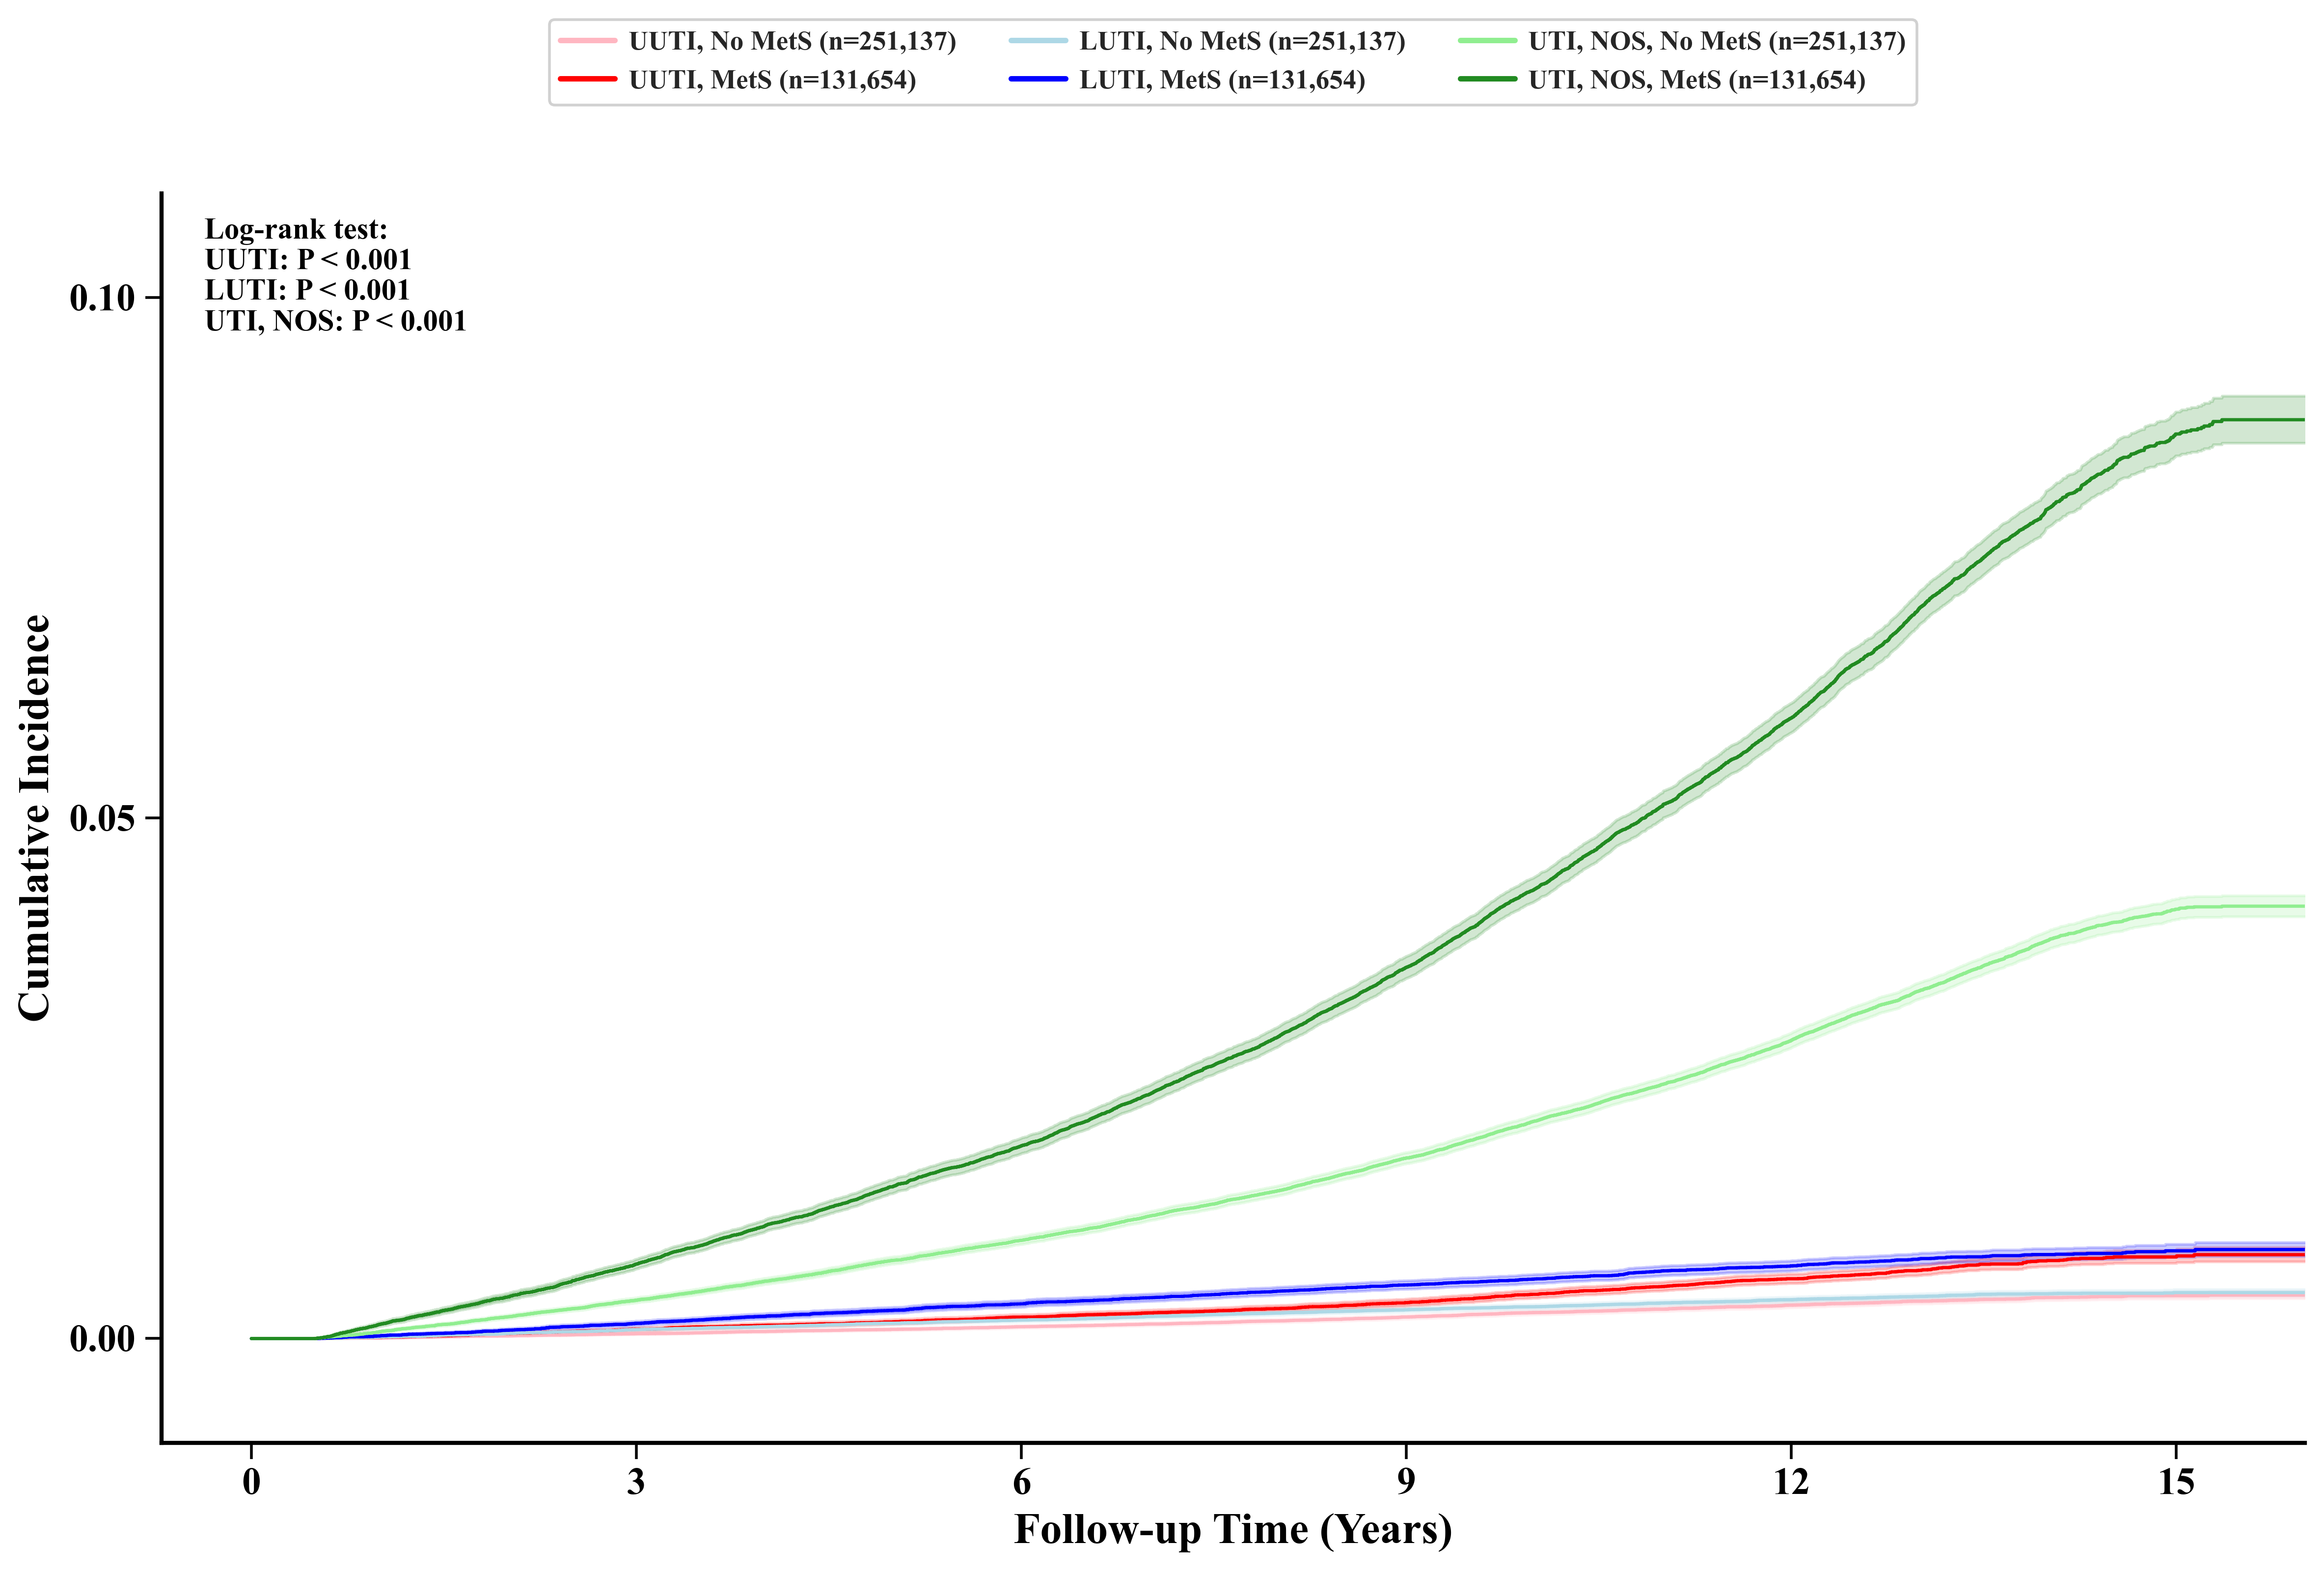


**Figure S10.** Cumulative risk of UTI with and without MetS, stratified by UTI subtypes (UUTI, LUTI and UTI, NOS) (Model 3 adjusted)


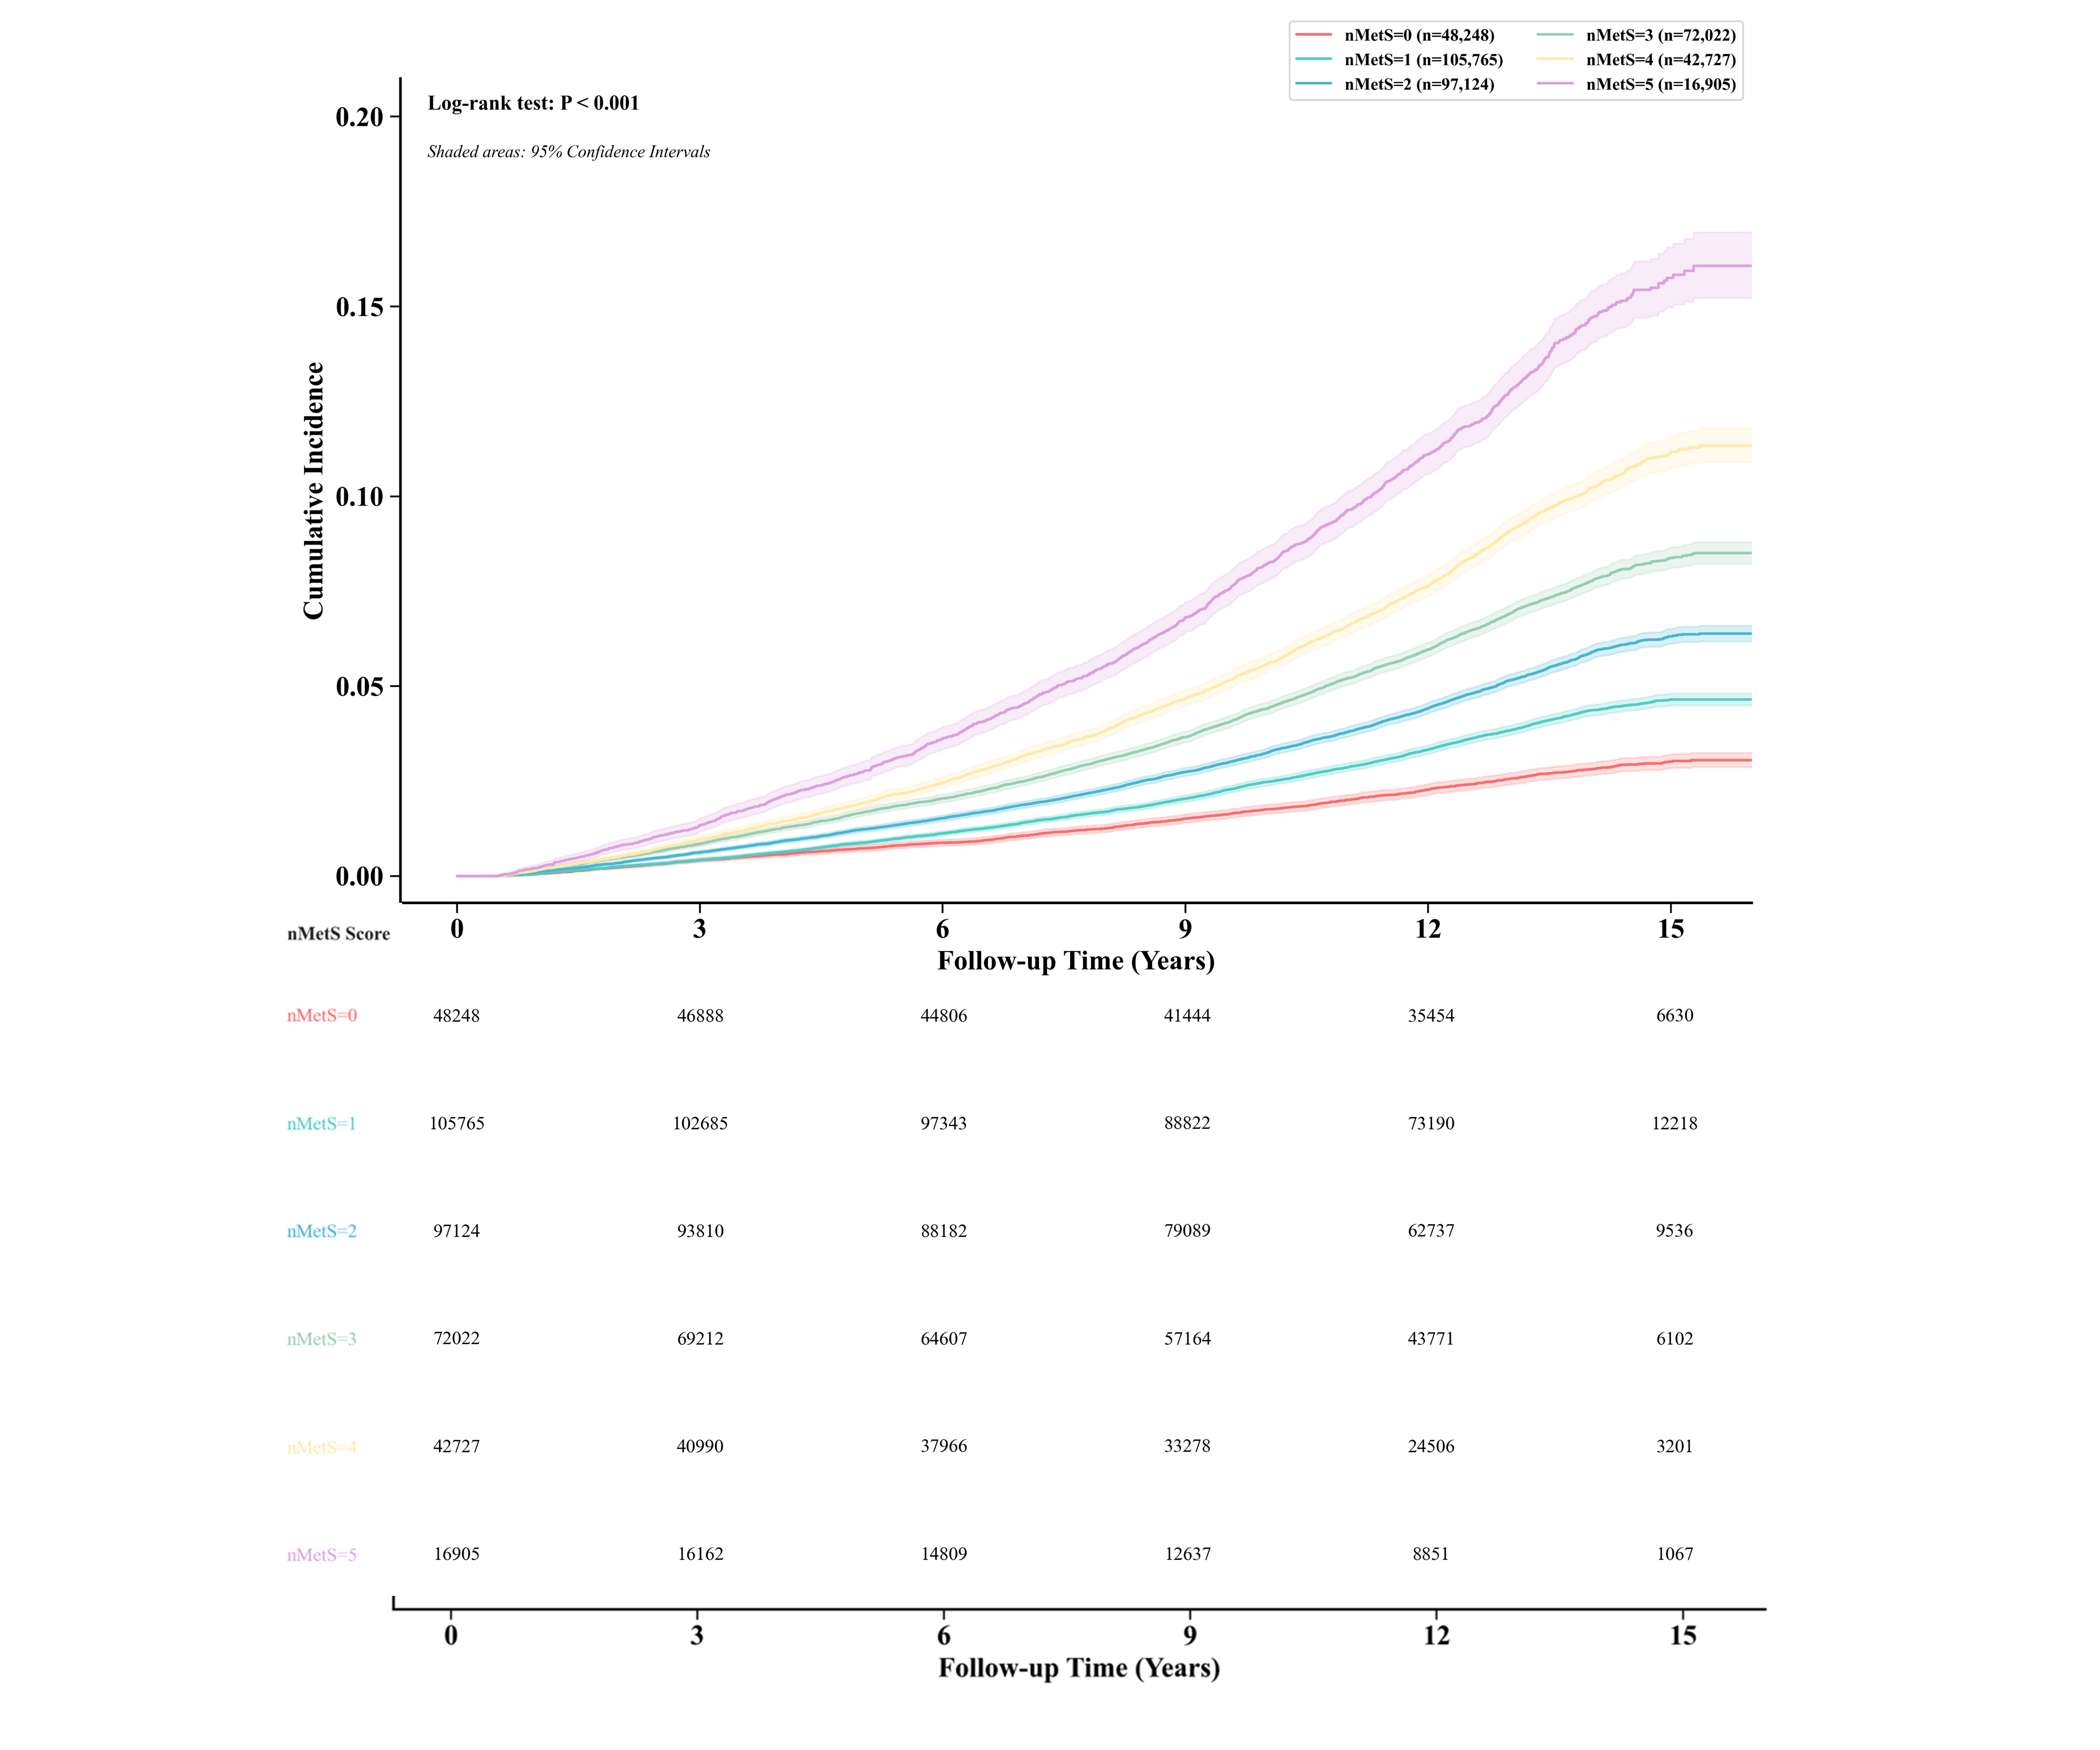


**Figure S11.** Cumulative risk of UTI by nMetS (0–5) (Model 3 adjusted)


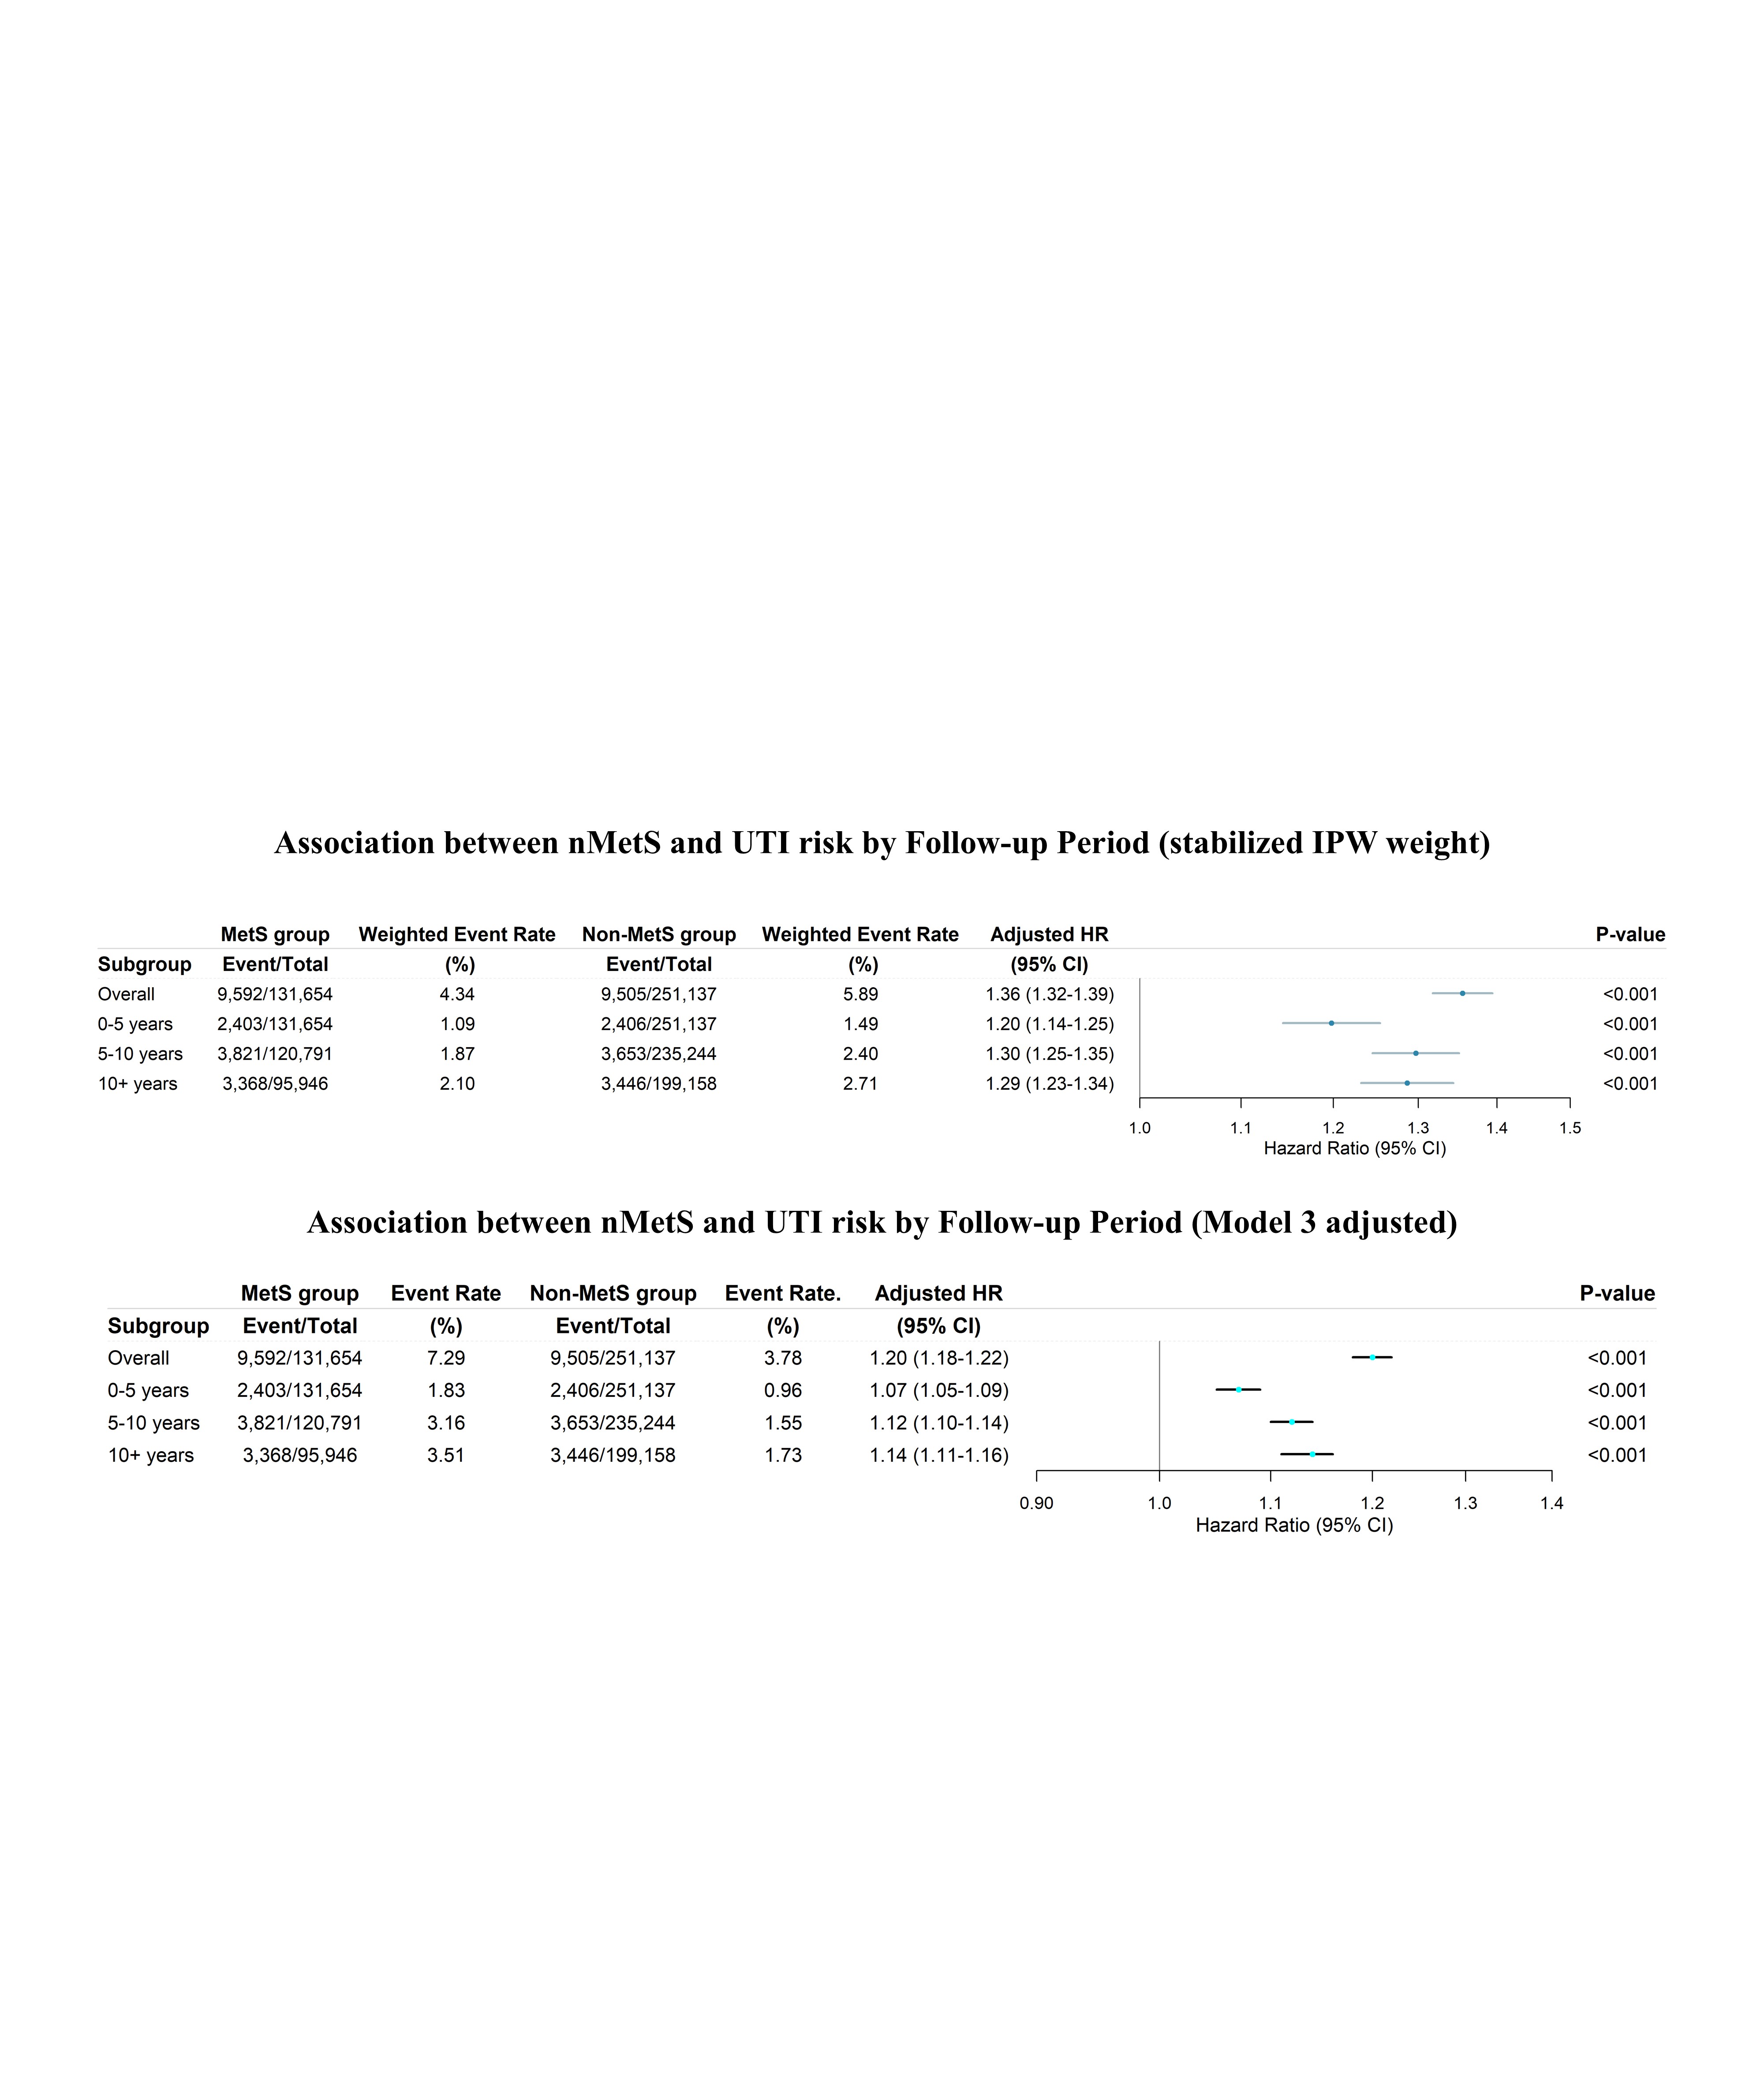


**Figure 12.** Association between MetS and UTI Risk by Follow-up Period (stabilized IPW weights and Model 3 adjusted)


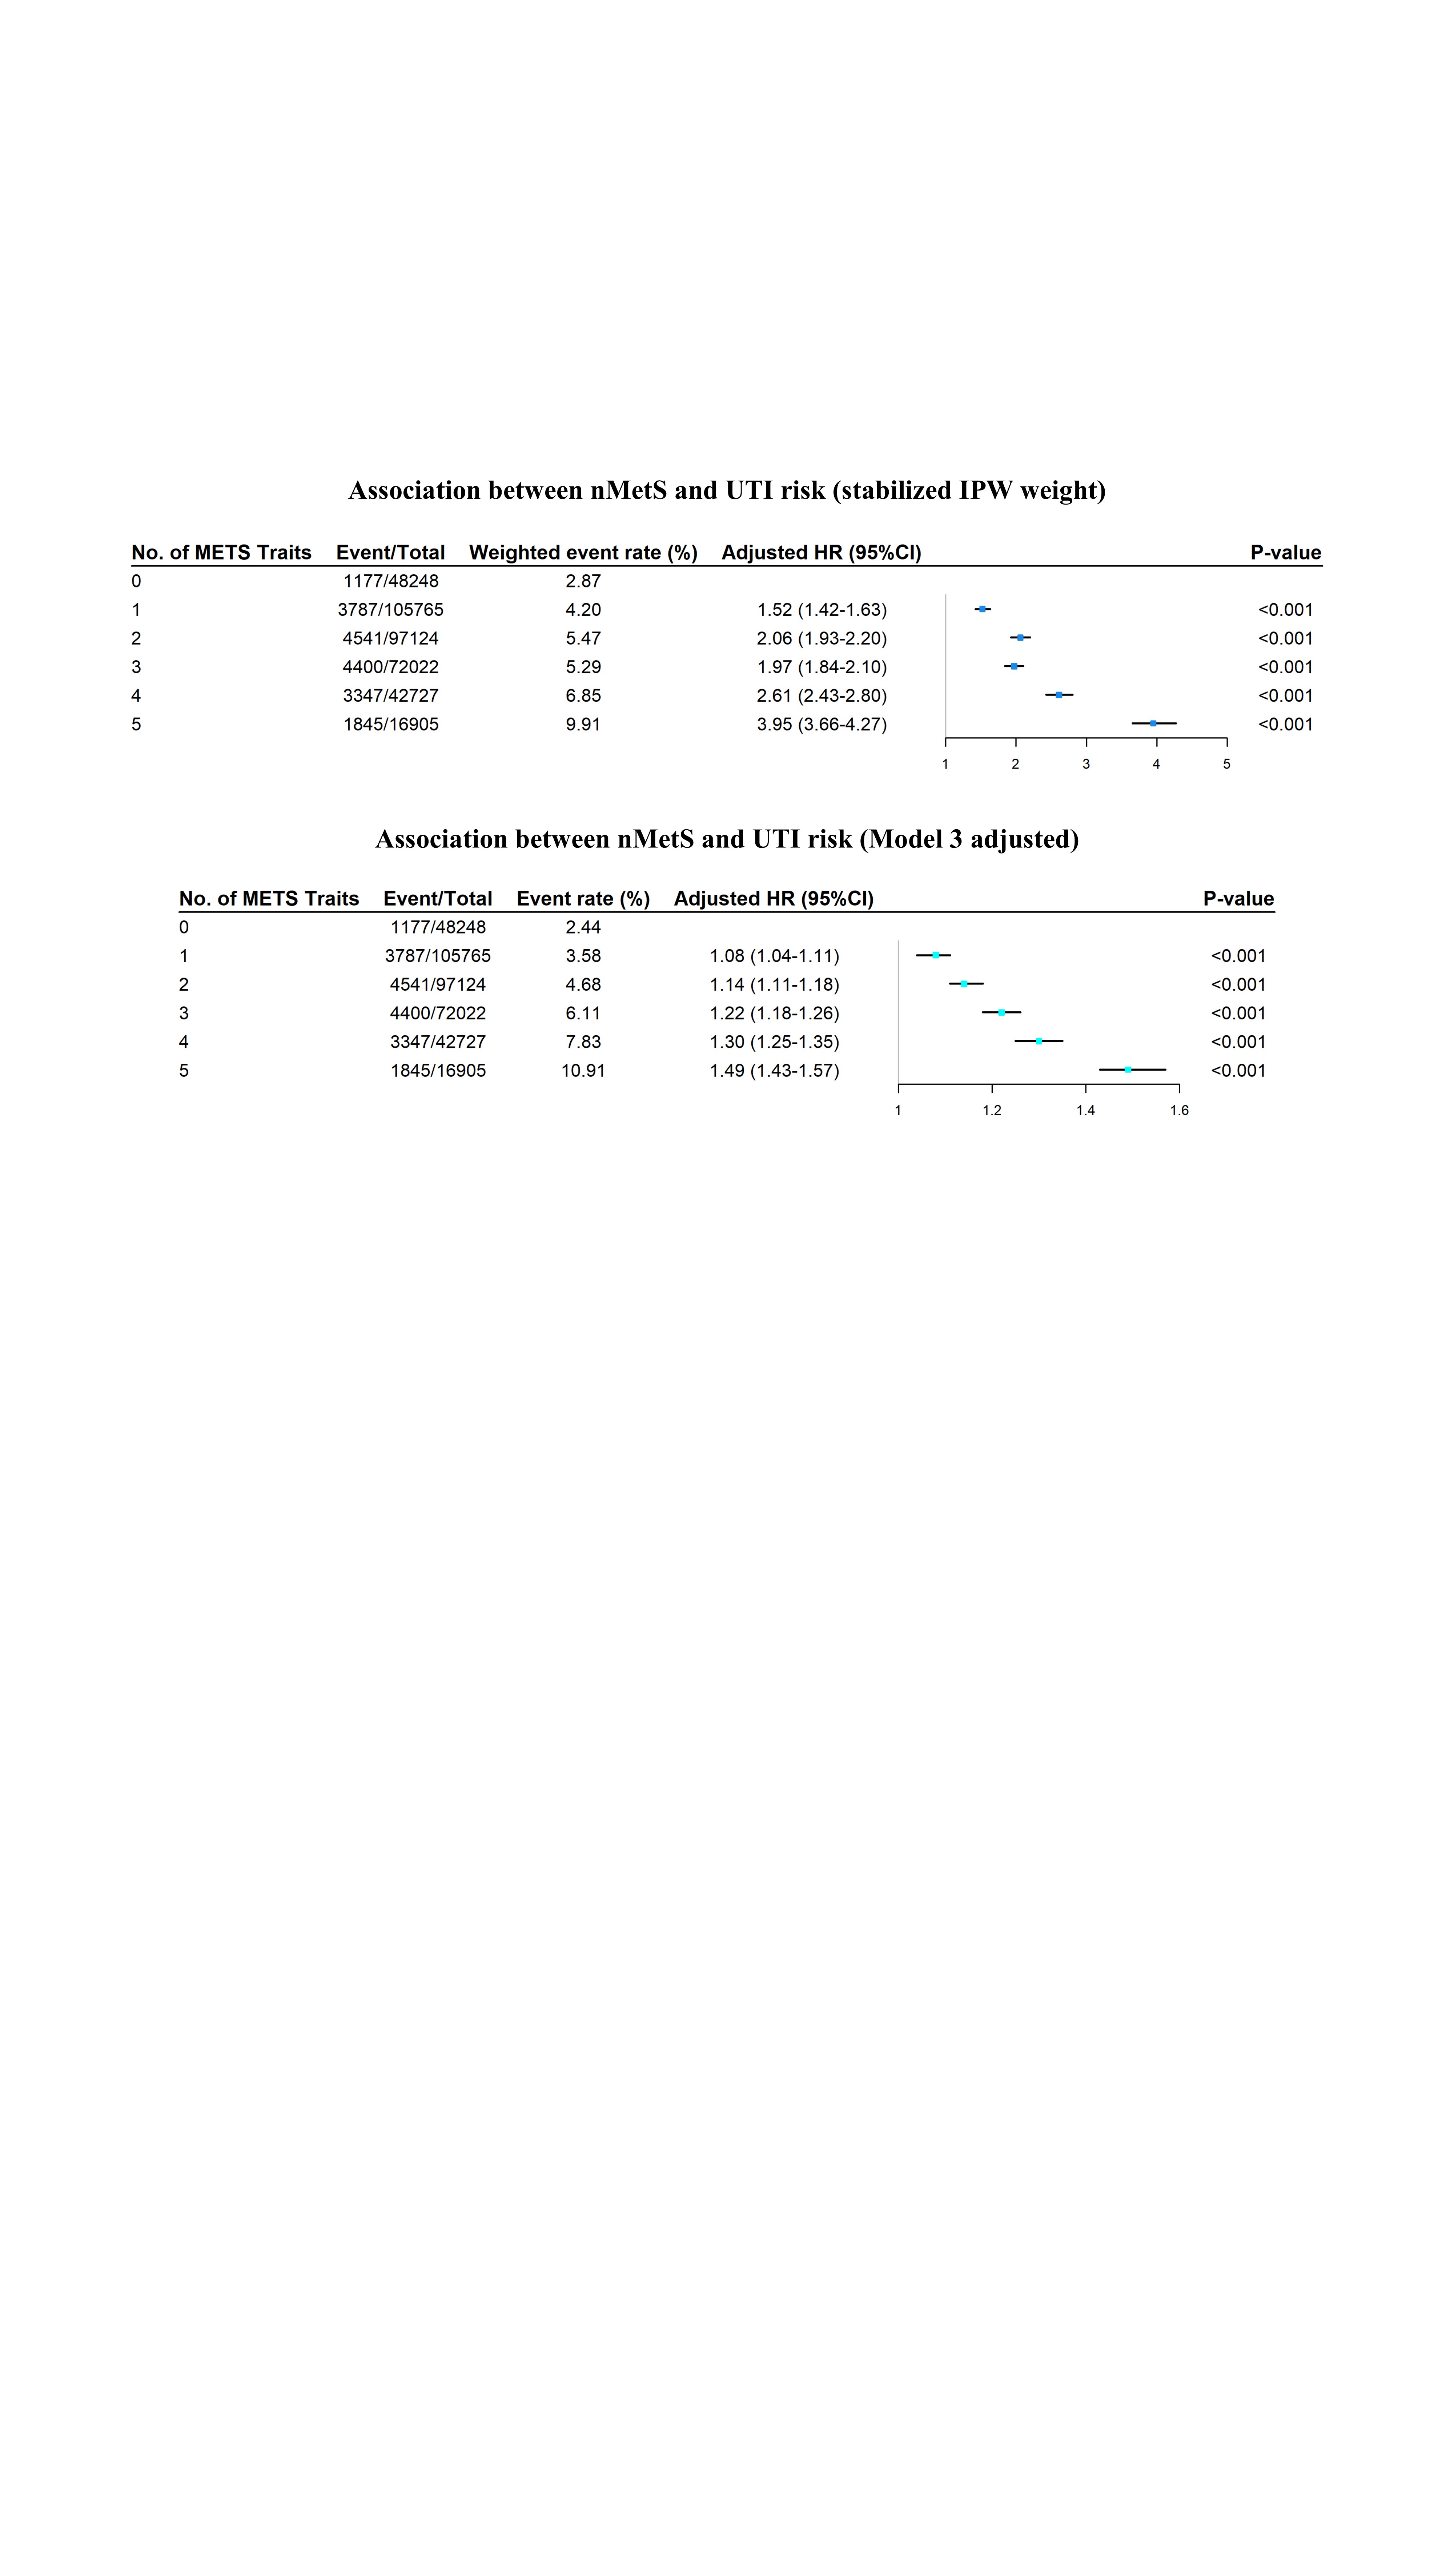


**Figure S13.** Association between nMetS and UTI risk (stabilized IPW weights and Model 3 adjusted)


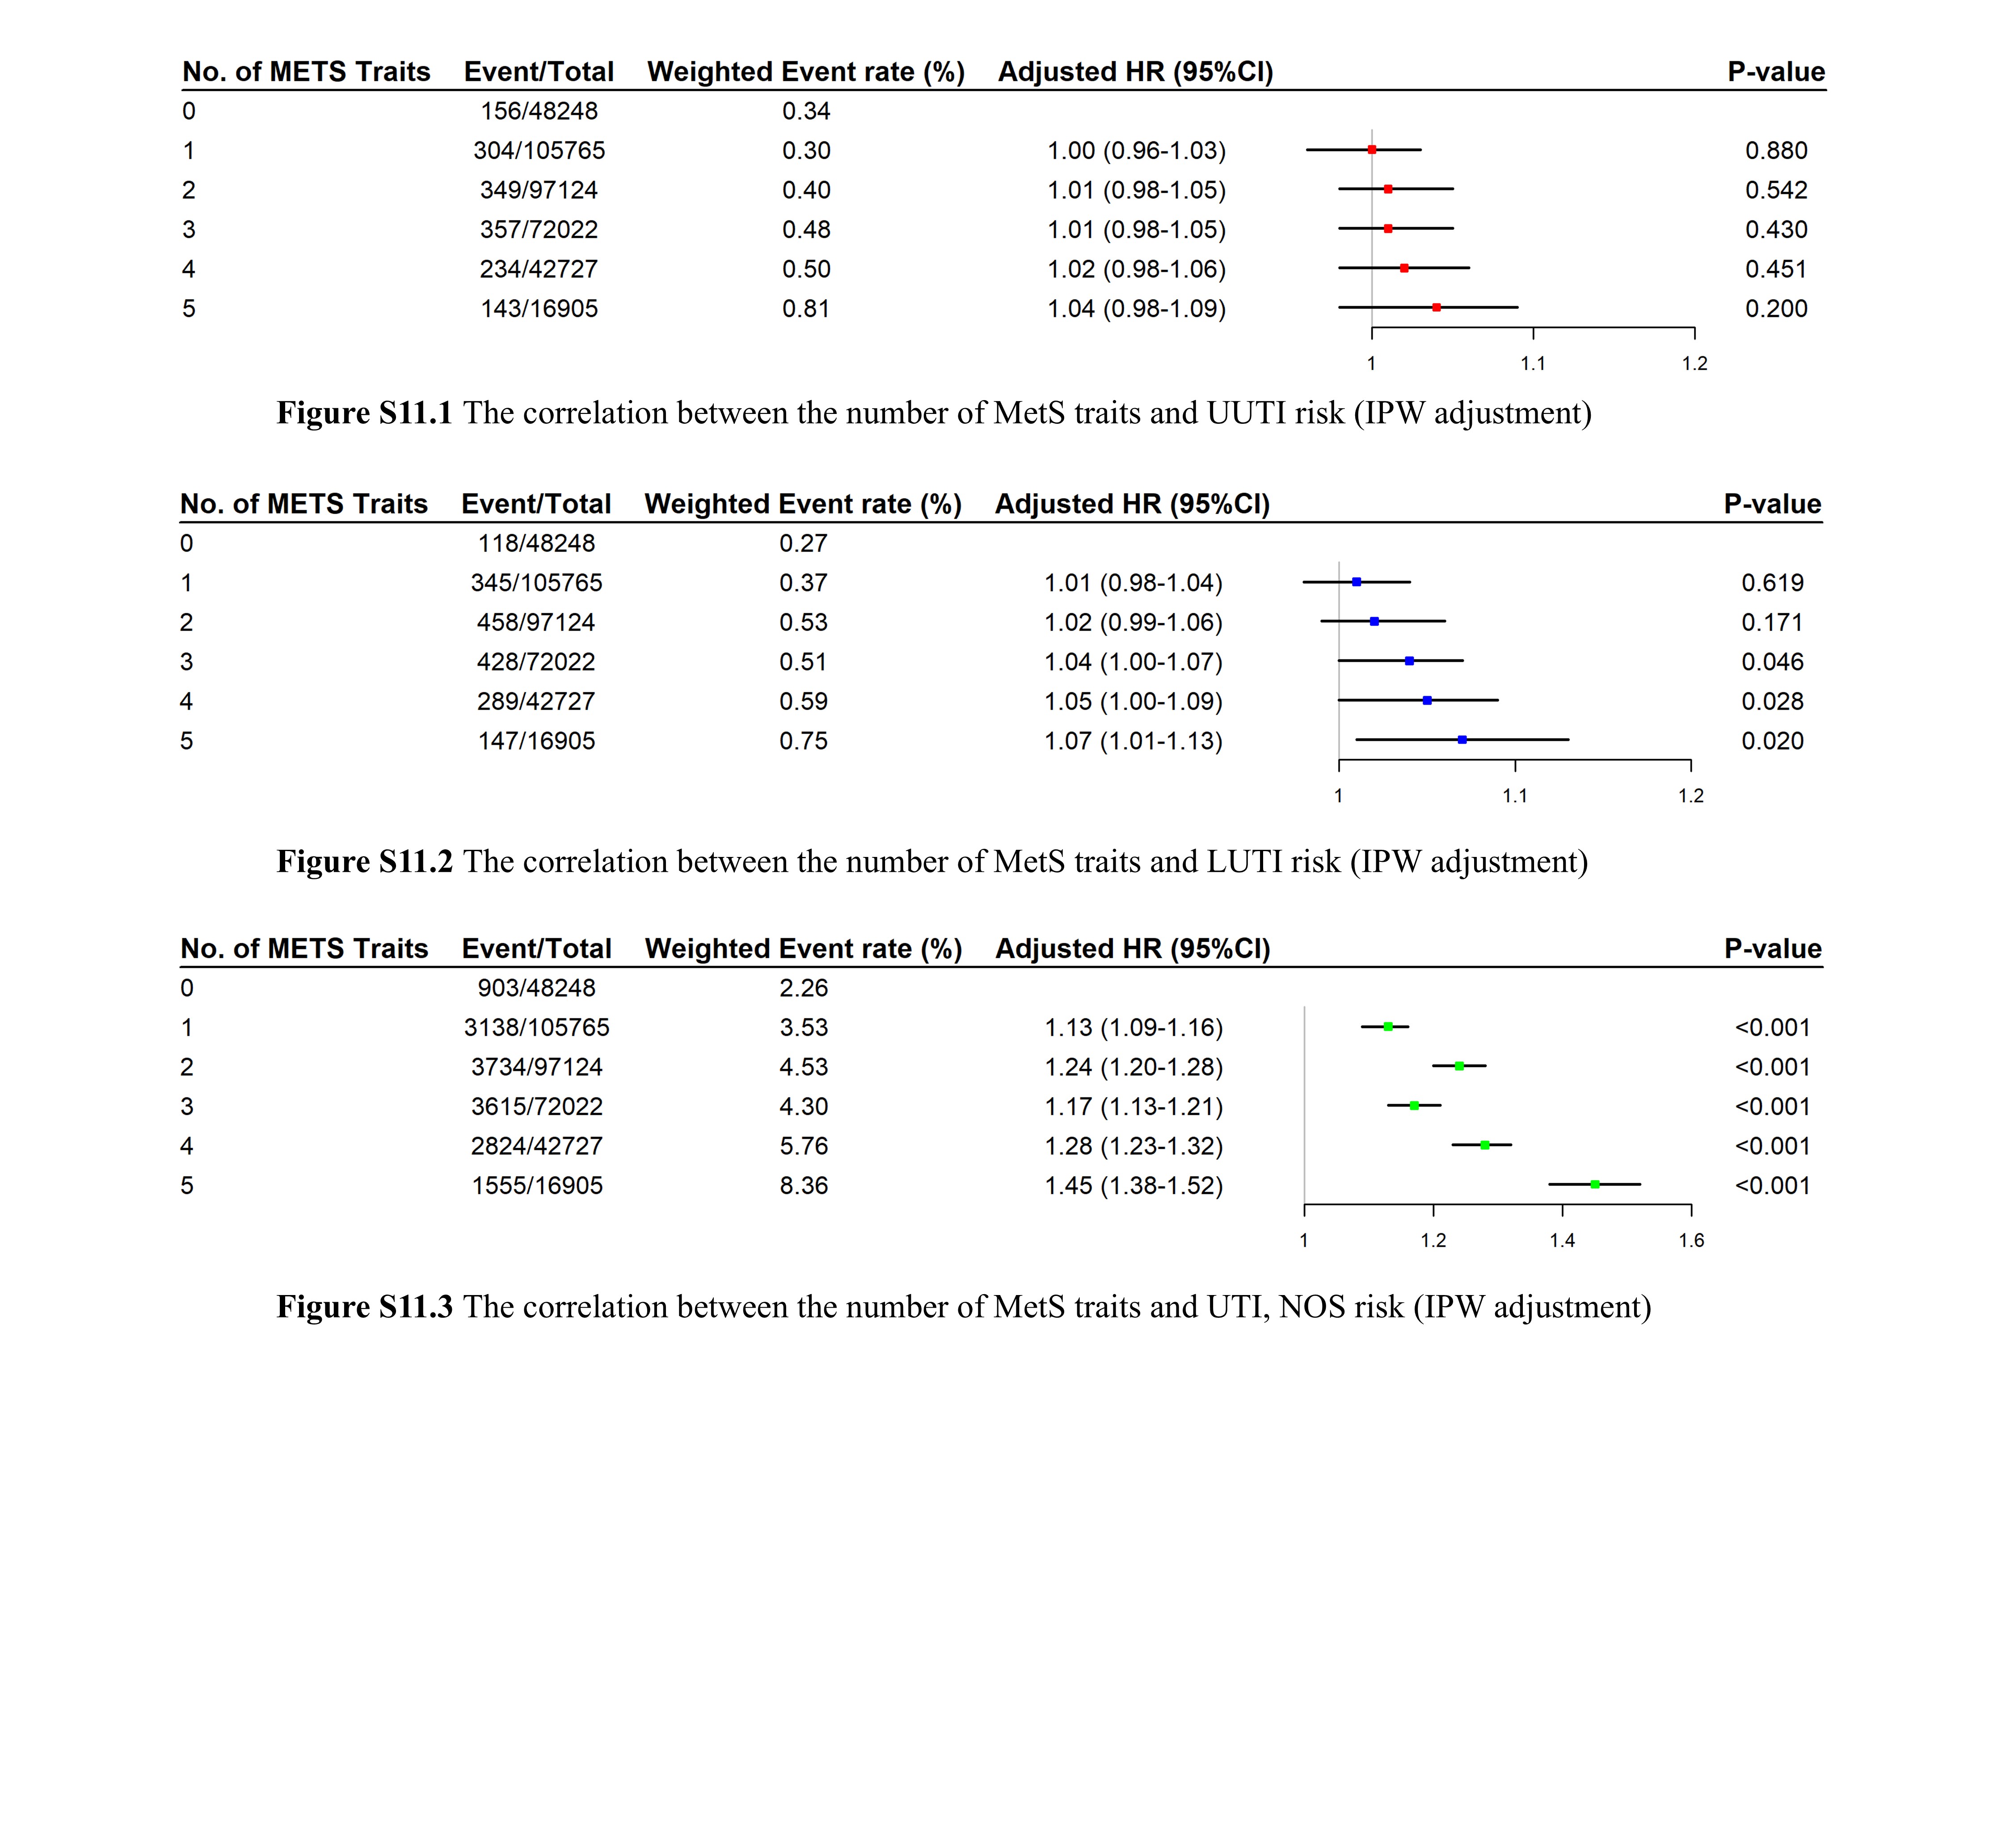


**Figure S14.** Association between nMetS and UTI Risk stratified by UTI subtypes (UUTI, LUTI and UTI, NOS) (stabilized IPW weights)


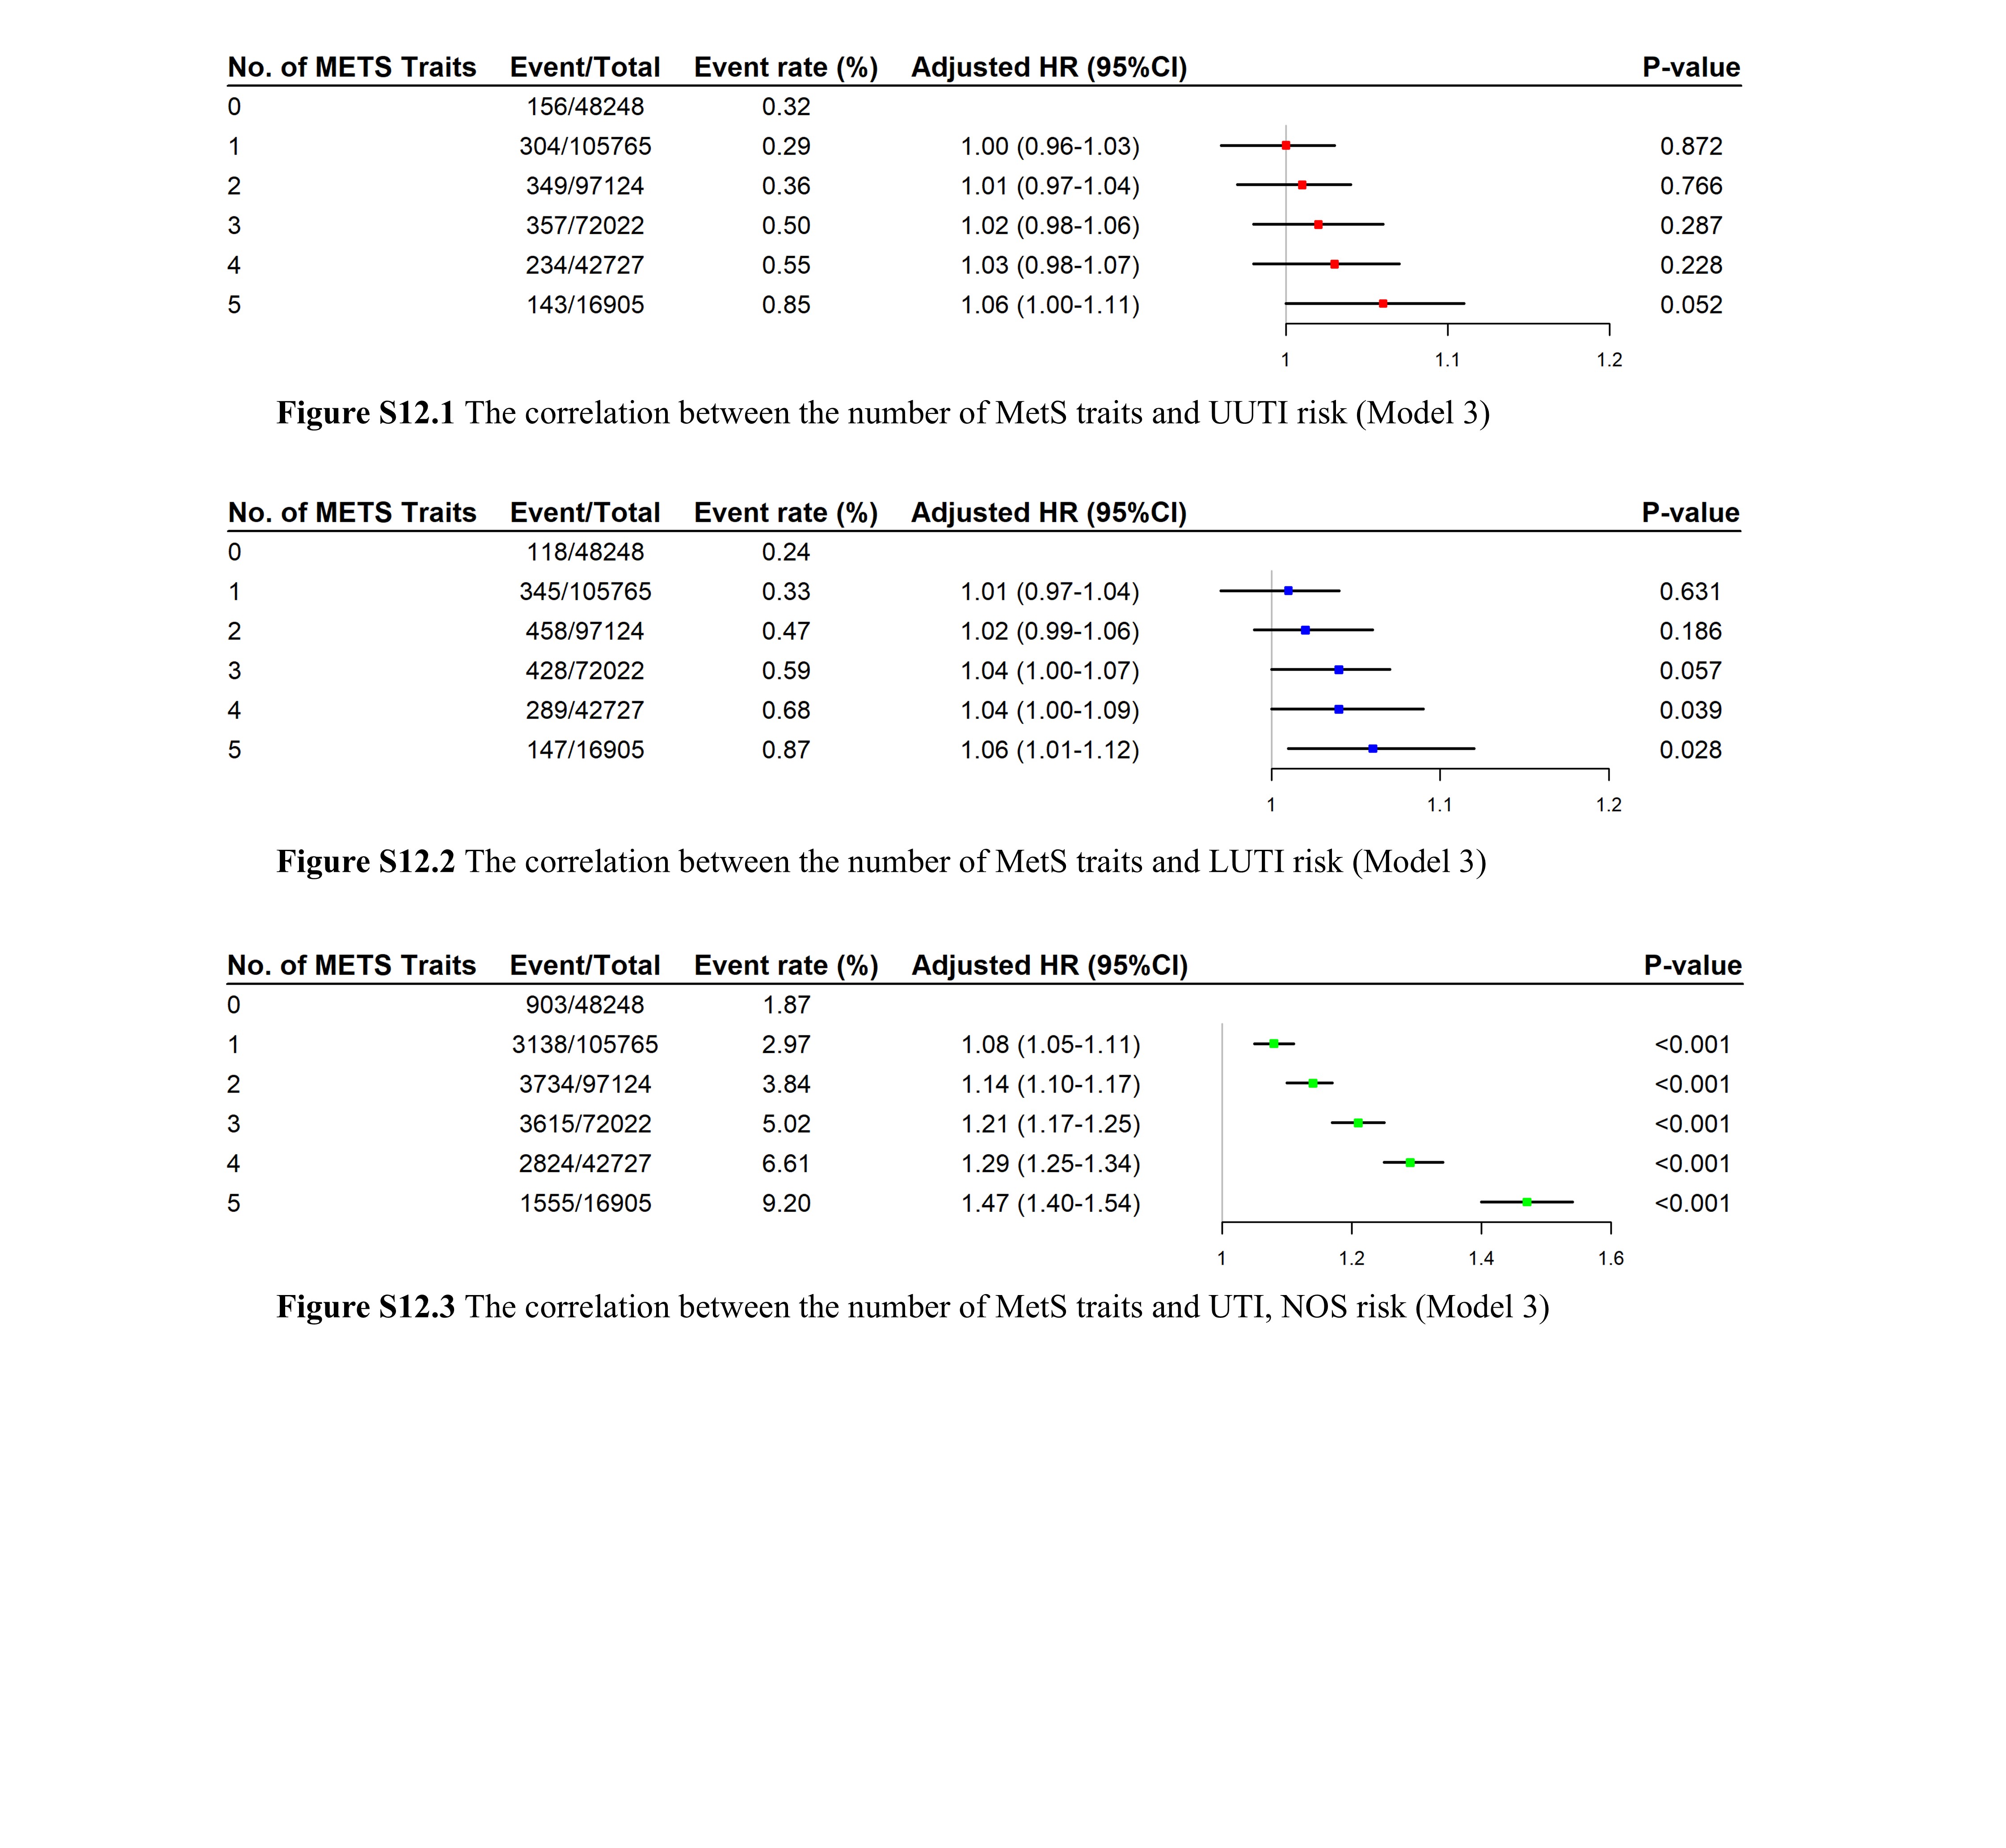


**Figure S15.** Association between nMetS and UTI Risk stratified by UTI subtypes (UUTI, LUTI and UTI, NOS) (Model 3 adjusted)





**Figure S16.** Association of Metabolic, Anthropometric, and Biochemical Parameters with UTI Risk: Per-Unit Increment Analyses (Model 3 adjusted)





**Figure S17.** Association of Metabolic, Anthropometric, and Biochemical Parameters with UTI Risk: Restricted Cubic Spline Analyses (Model 3 adjusted)

BMI, body mass index; BFP, body fat percentage; WC, waist circumference; HDL, high-density lipoprotein; LDL, low-density lipoprotein.


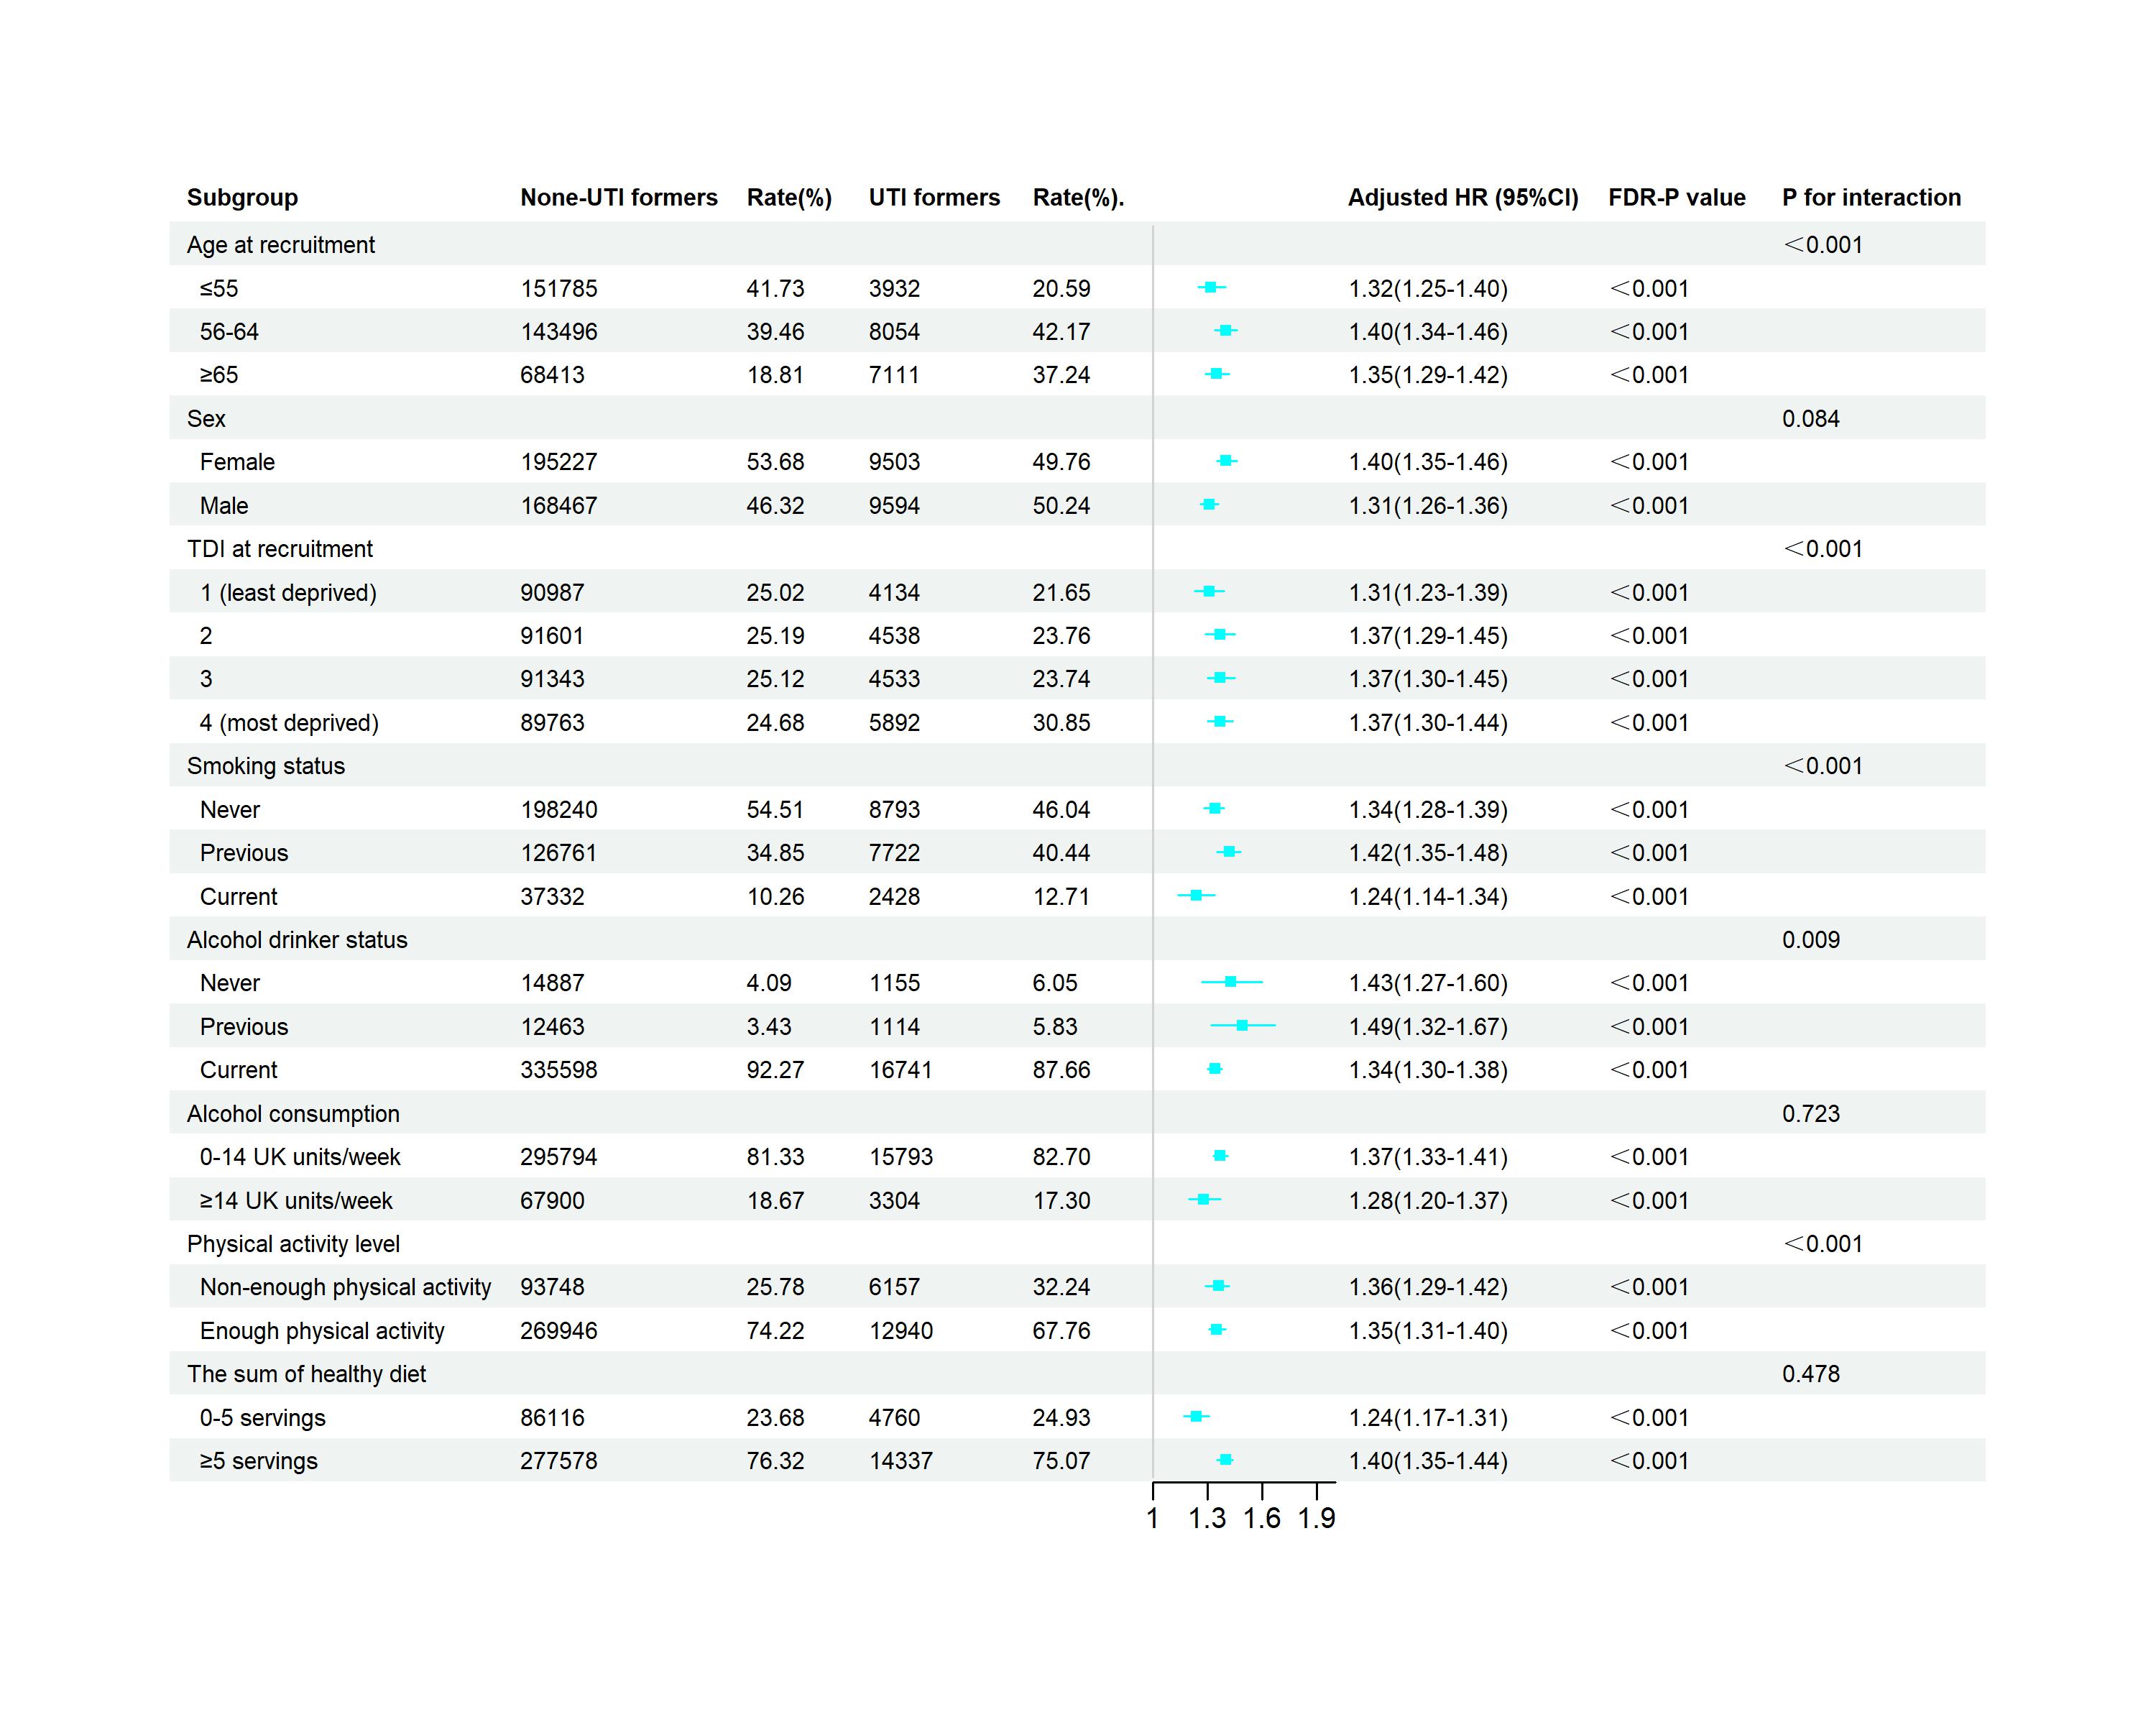


**Figure S18.** Subgroup Analysis of UTI Risk Stratified by Demographic and Lifestyle Factors: Interaction Tests Based on IPW-Adjusted HR

TDI at recruitment, Townsend deprivation index at recruitment


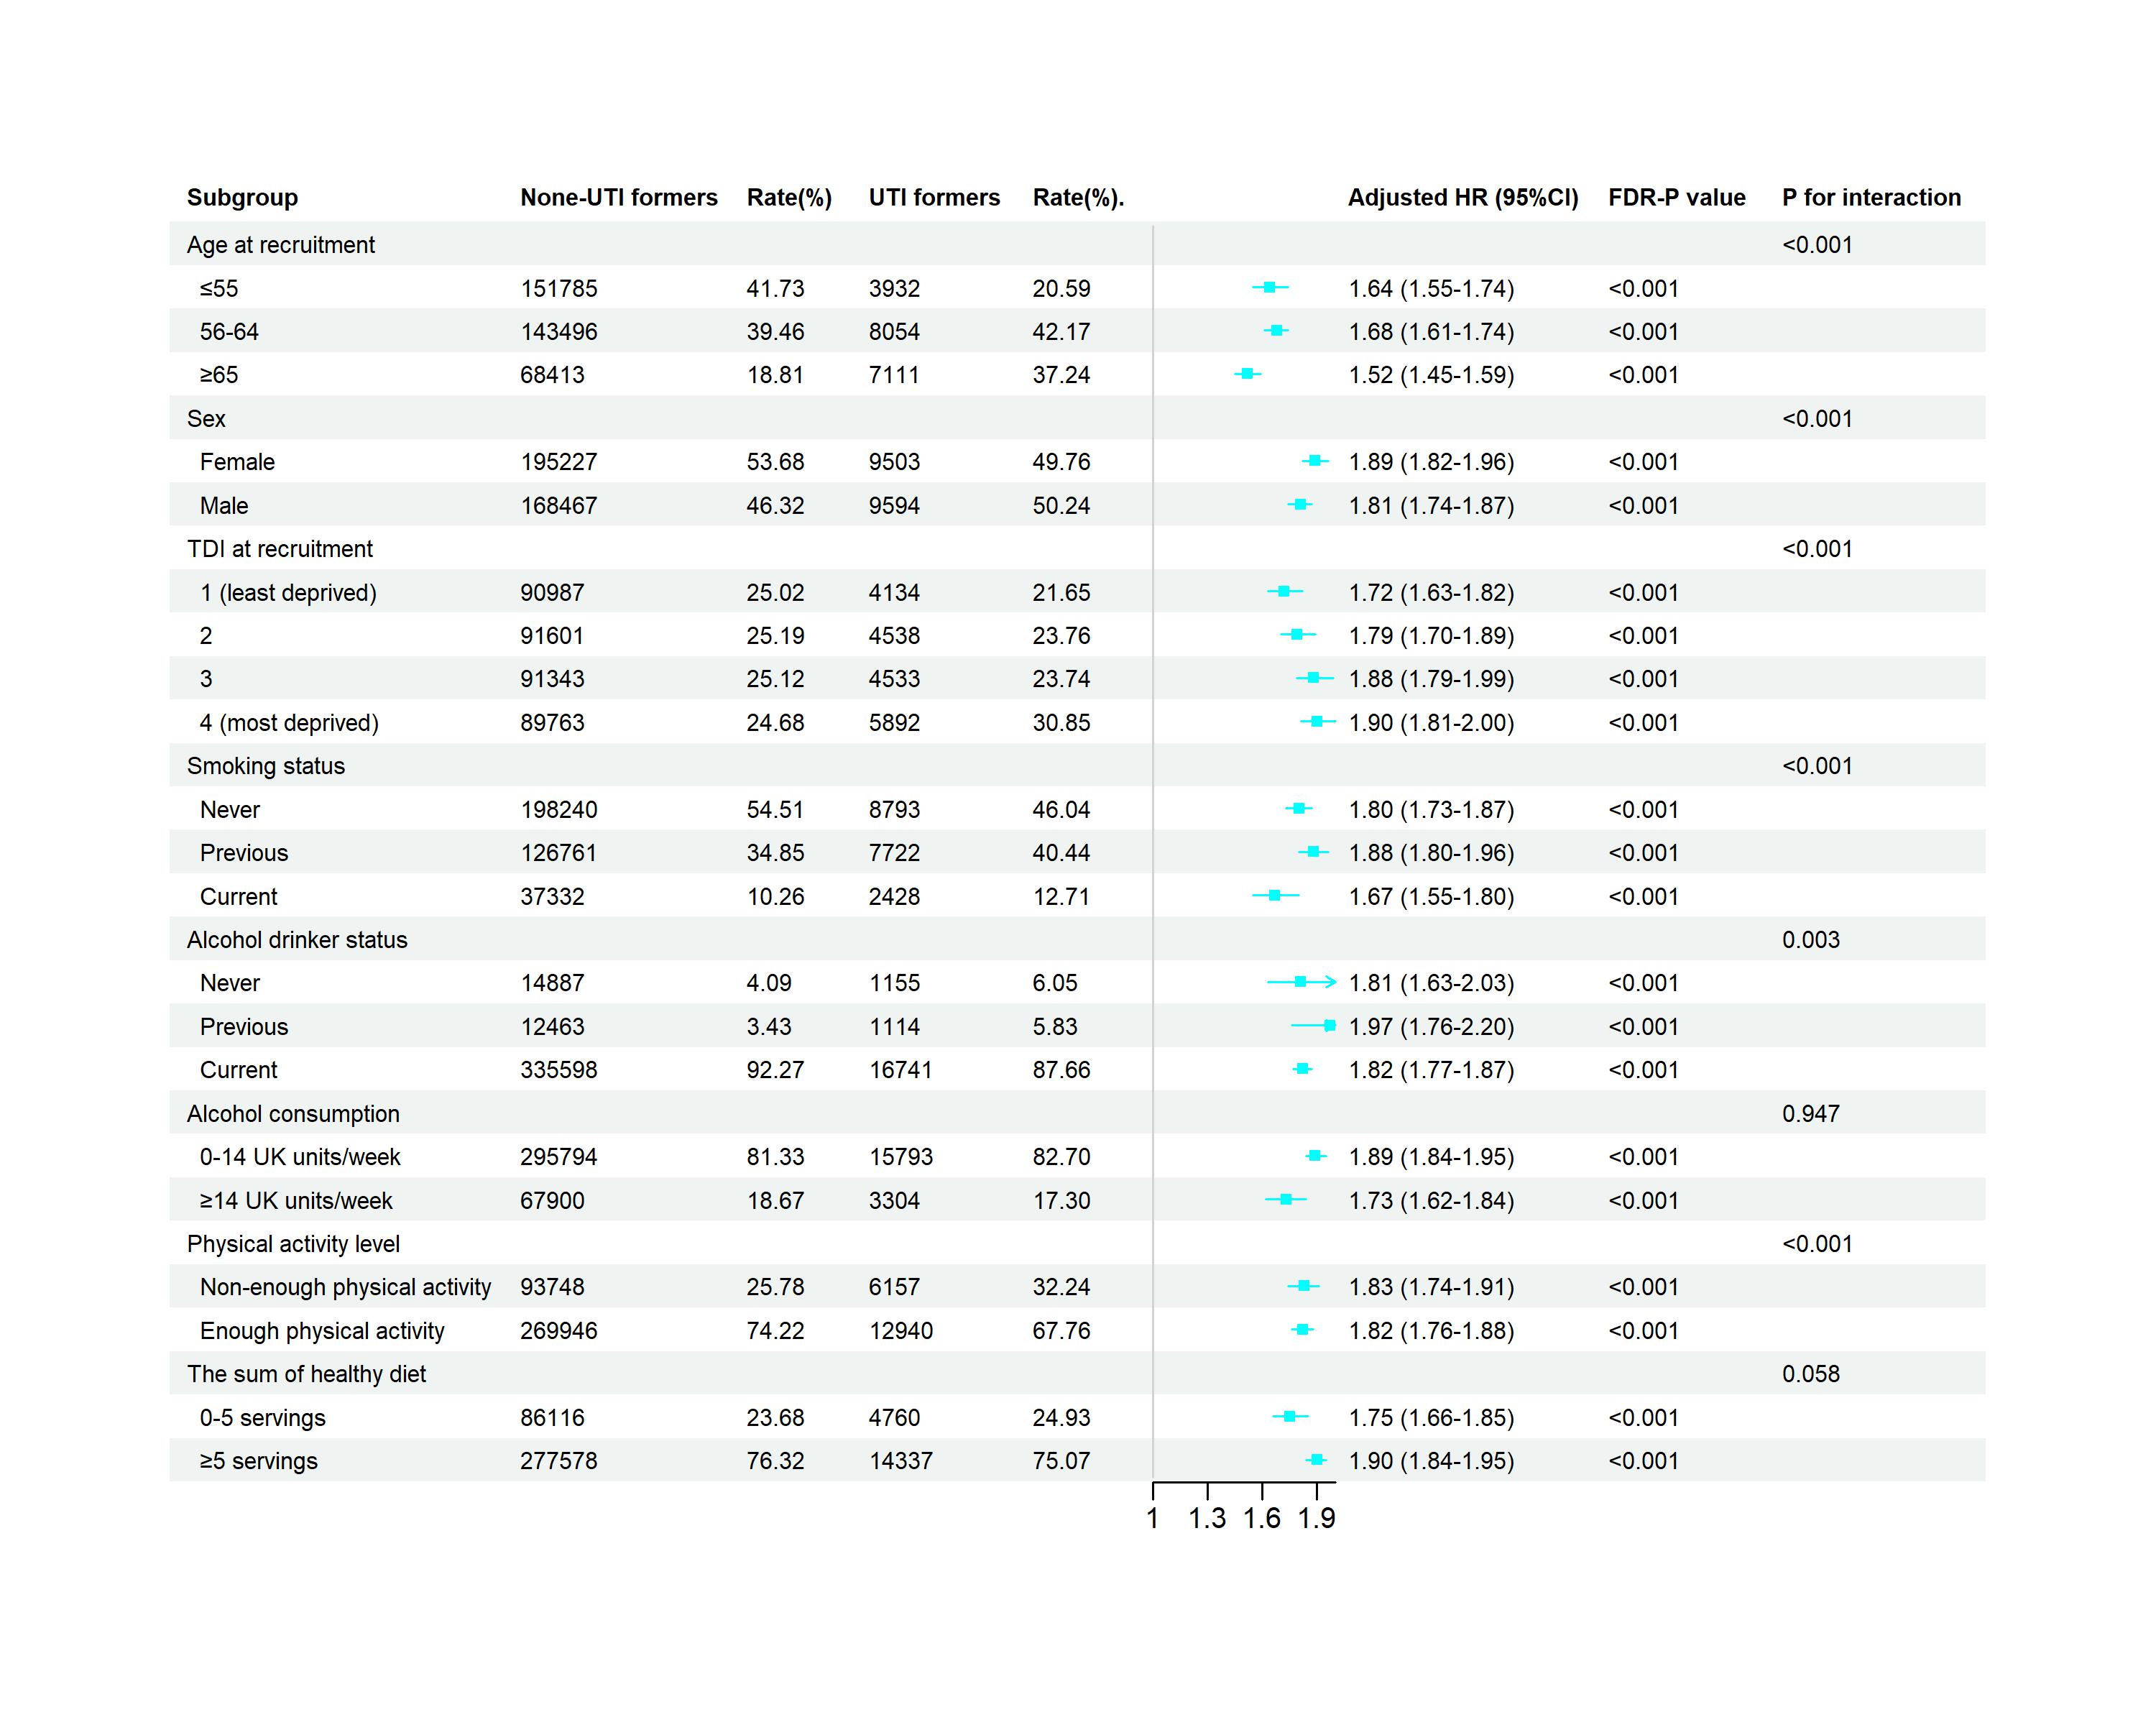


**Figure S19.** Subgroup Analysis of UTI Risk Stratified by Demographic and Lifestyle Factors: Interaction Tests Based on Model 3-Adjusted HR

TDI at recruitment, Townsend deprivation index at recruitment.


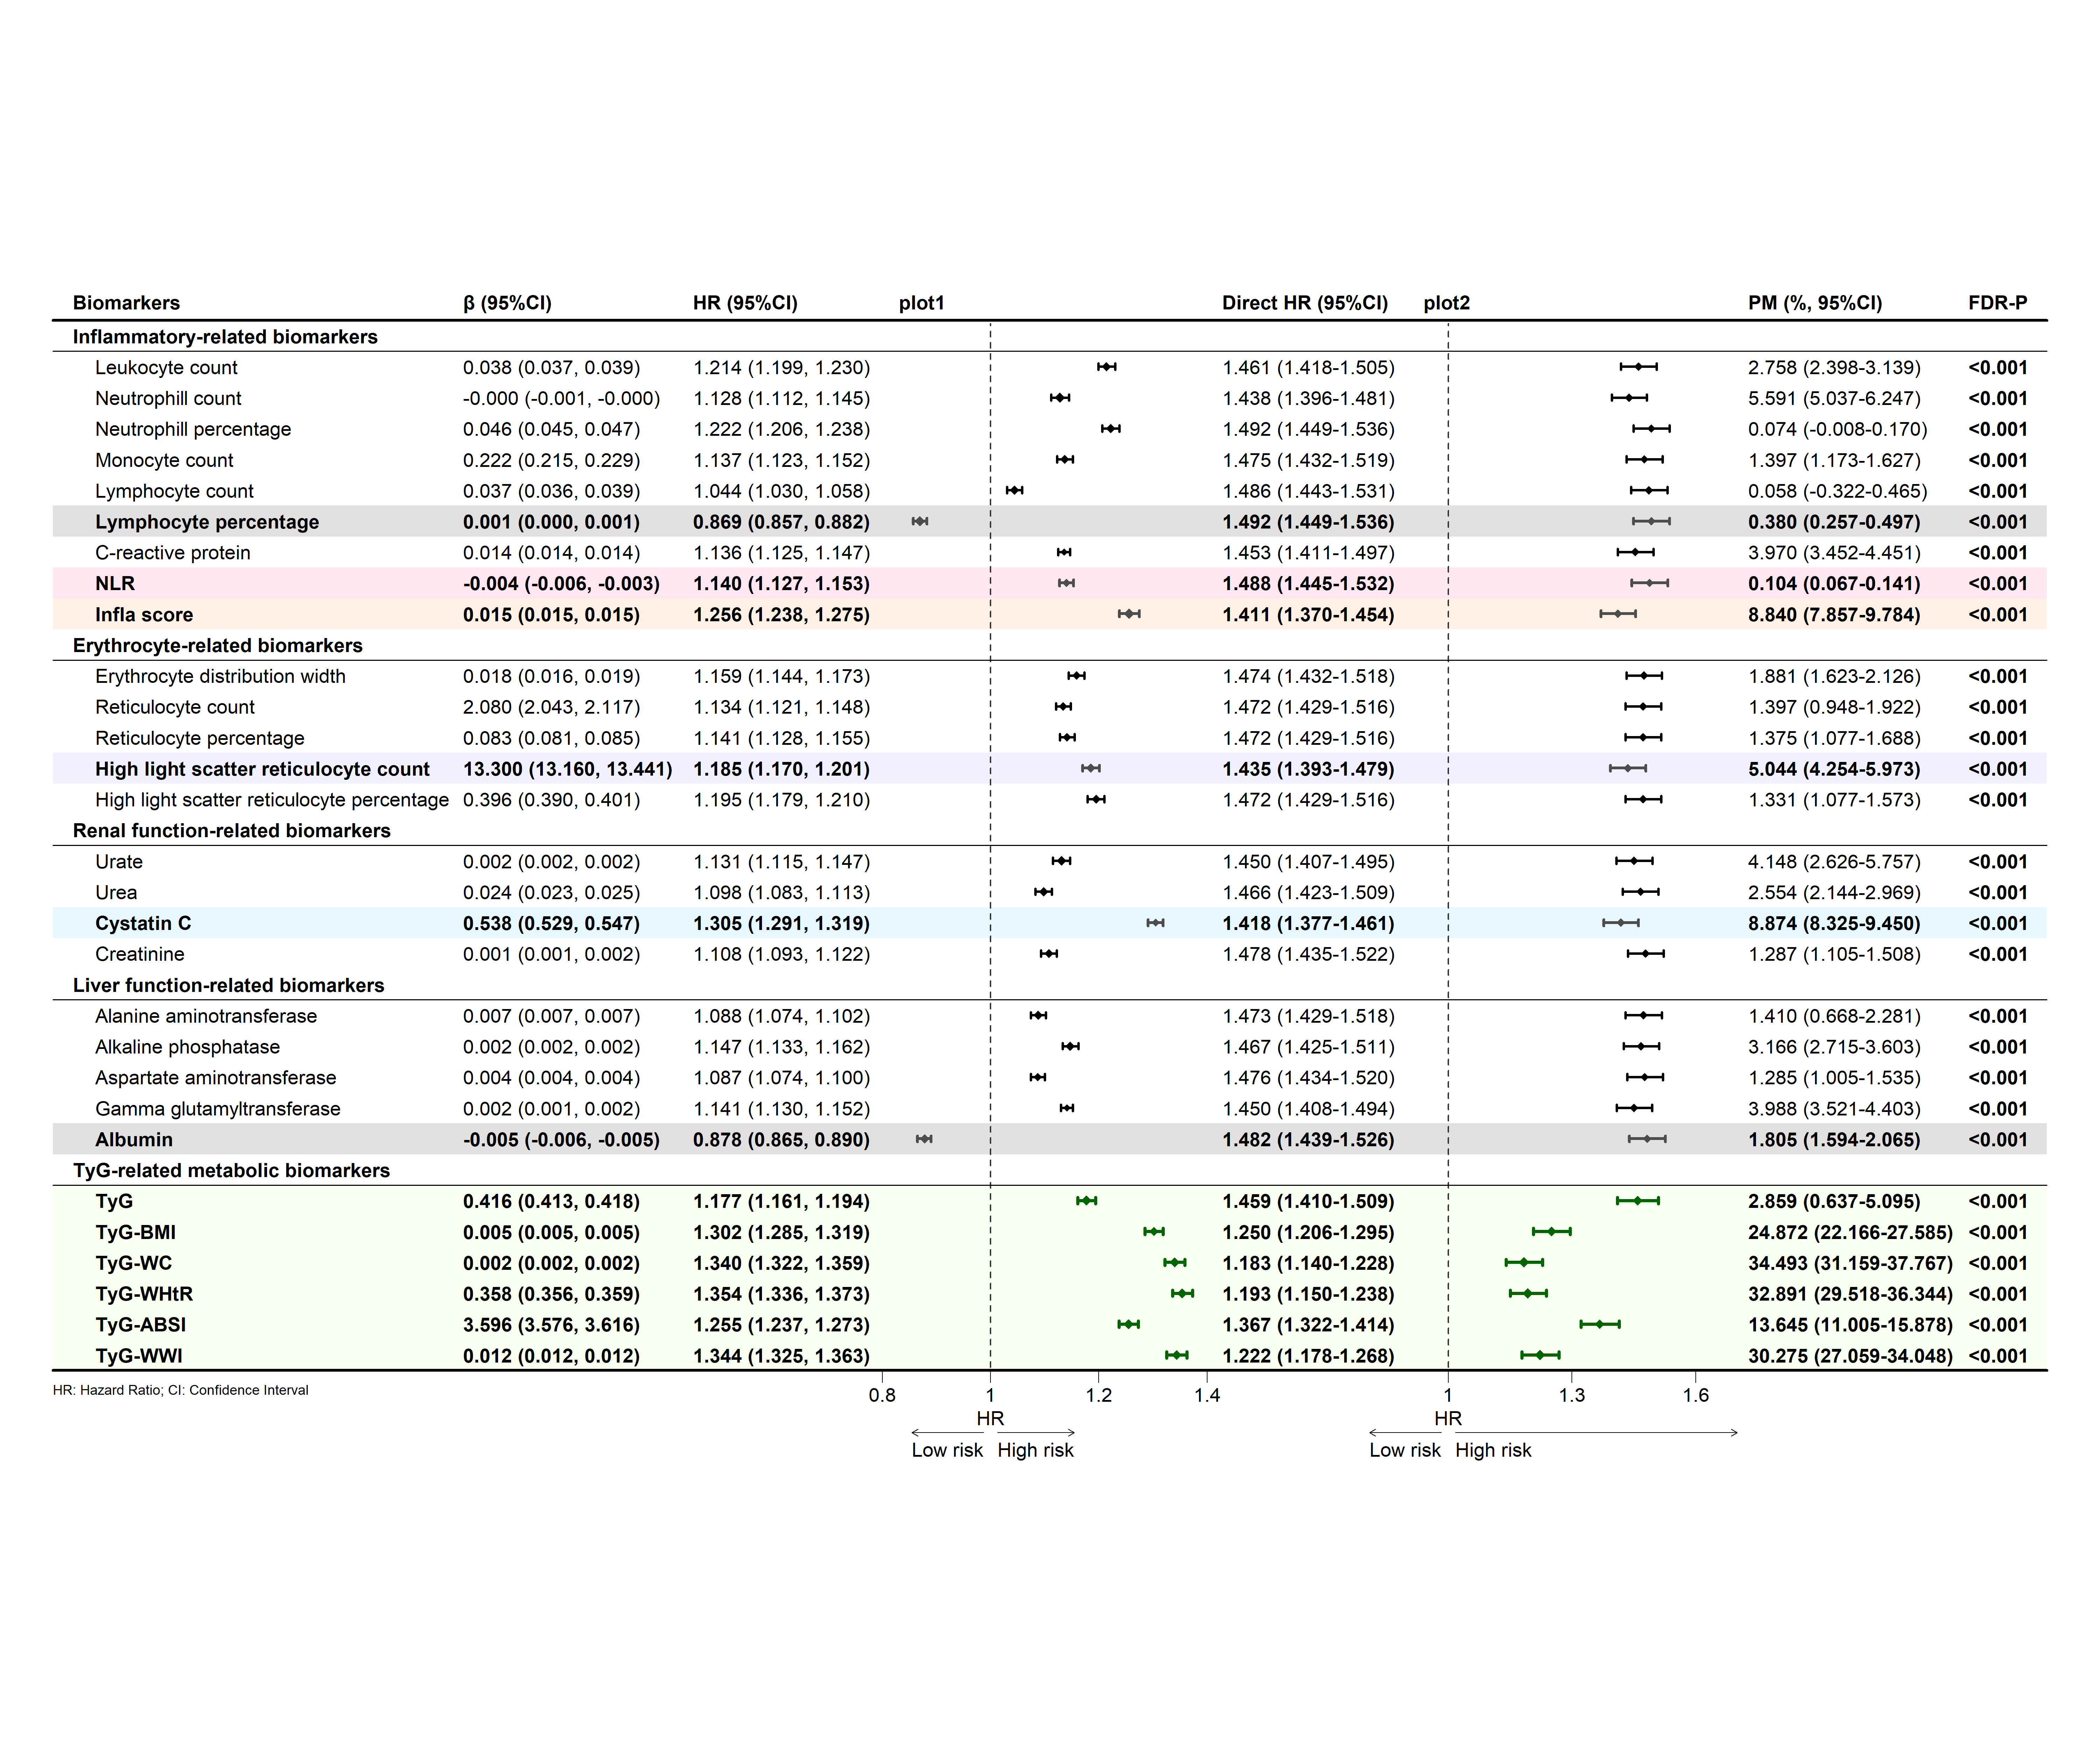


**Figure S20.** Mediation Analyses of MetS‑Associated Metabolic and Biochemical Parameters with UTI Risk: Model 3‑Adjusted HR

NLR, neutrophil-to-lymphocyte ratio; PLR, platelet-to-lymphocyte ratio; TyG, triglyceride-glucose index; TyG-BMI, triglyceride glucose-body mass index; TyG-WC, triglyceride glucose-waist circumference; TyG-WHtR, triglyceride glucose-waist to height ratio; TyG-ABSI, triglyceride glucose-a body shape index; TyG-WWI, triglyceride glucose-waist to weight ratio.

| **UTI subtype** | **ICD‑10 codes** | **Corresponding diagnosis in UK Biobank** |
| --- | --- | --- |
| Upper UTI (UUTI) | N10, N12 | Acute pyelonephritis, Chronic pyelonephritis |
| Lower UTI (LUTI) | N30.0, N30.9 | Acute cystitis, Cystitis unspecified |
| UTI, not otherwise specified (UTI, NOS) | N39.0 | Urinary tract infection unspecified |

**Table S1.** Classification of UTI subtypes and corresponding ICD‑10 codes

**Classification standards:** 1. Participants were classified according to the earliest recorded UTI subtype.

2. For those with simultaneous codes for UUTI, LUTI, and UTI, NOS, classification prioritized UUTI first, followed by LUTI, this principle based on the greater clinical severity of UUTI.

| **Covariate** | **Category/Definition** | **UK Biobank Field IDs** |
| --- | --- | --- |
| Sex | "Male", "Female" | 22001 |
| Age at recruitment | Continuous | 21022 |
| Ethnicity | "White", "Mixed", "Asian or Asian British", "Black or Black British", "Chinese", "Other/Unknown" | 21000 |
| Educational attainment | "A-level or equivalent", "Degree", "No qualification/Unknown", "O-level/GCSE/CSE", "Vocational/Professional" | 6138 |
| Average total household income before tax | "< £18,000", "£18,000 to £30,999", "£31,000 to £51,999", "£52,000 to £100,000", "> £100,000" | 738 |
| Employment status | "Other/Unknown", "Employed", "Retired", "Homemaker", "Sick/Disabled", "Unemployed", "Unpaid or voluntary work", "Full or part-time student" | 6142 |
| Townsend Deprivation Index at recruitment | Categorized into quartiles (1=lowest to 4=highest deprivation) [1] | 189 |
| Smoking status | "Never", "Previous", "Current" | 20116 |
| Alcohol drinker status | "Never", "Previous", "Current" | 20117 |
| Alcohol consumption | categorized as ≤14 vs. >14 UK units/week[2, 3] | 1558, 1568, 1578, 1588,  1598, 1608, 5364, 4407,  4418, 4440, 4451, 4429 |
| Physical activity | weekly metabolic equivalent of task (MET)-minutes,  categorized as ≤600 vs. >600 MET-min/week[2, 3] | 864, 874, 884,  894, 904, 914 |
| Dietary intake | daily servings of fruits and vegetables,  categorized as ≤5 vs. >5 servings/day[2, 3] | 1289, 1299, 1309 |

**Table S2.** Baseline Covariates, Categorization Criteria, and Corresponding UK Biobank Field IDs

1 Ye J, Wen Y, Sun X, Chu X, Li P, Cheng B, Cheng S, Liu L, Zhang L, Ma M, Qi X, Liang C, Kafle OP, Jia Y, Wu C, Wang S, Wang X, Ning Y, Sun S, Zhang F. Socioeconomic Deprivation Index Is Associated With Psychiatric Disorders: An Observational and Genome-wide Gene-by-Environment Interaction Analysis in the UK Biobank Cohort. *Biol Psychiatry*. 2021;89(9):888-95.

2 Foster HME, Ho FK, Mair FS, Jani BD, Sattar N, Katikireddi SV, Pell JP, Niedzwiedz CL, Hastie CE, Anderson JJ, Nicholl BI, Gill JMR, Celis-Morales C, O'Donnell CA. The association between a lifestyle score, socioeconomic status, and COVID-19 outcomes within the UK Biobank cohort. *BMC Infect Dis*. 2022;22(1):273.

3 Ding D, Rogers K, van der Ploeg H, Stamatakis E, Bauman AE. Traditional and Emerging Lifestyle Risk Behaviors and All-Cause Mortality in Middle-Aged and Older Adults: Evidence from a Large Population-Based Australian Cohort. *PLoS Med*. 2015;12(12):e1001917.

| Variables | Overall  (n = 382791) | No UTI  (n = 363694) | UTI  (n = 19097) | P |
| --- | --- | --- | --- | --- |
|
| Sex, n(%) |  |  |  | <0.001 |
| Female | 204730 (53.48) | 195227 (53.68) | 9503 (48.42) |  |
| Male | 178061 (46.52) | 168467 (46.32) | 9594 (51.58) |  |
| Age at recruitment, Mean ± SD | 56.78 ± 8.03 | 56.56 ± 8.03 | 61.00 ± 6.97 | <0.001 |
| BMI, Mean ± SD | 27.46 ± 4.80 | 27.39 ± 4.75 | 27.60 ± 4.98 | <0.001 |
| Whole body fat mass, Mean ± SD | 24.73 ± 9.59 | 24.61 ± 9.51 | 24.73 ± 10.11 | <0.001 |
| Body fat percentage, Mean ± SD | 31.18 ± 8.69 | 31.11 ± 8.67 | 31.00 ± 9.11 | <0.001 |
| Waist-to-Hip Ratio, Mean ± SD | 0.87 ± 0.09 | 0.87 ± 0.09 | 0.89 ± 0.09 | <0.001 |
| Townsend deprivation index at recruitment, n(%) |  |  |  | <0.001 |
| 1 (least deprived) | 95121 (24.85) | 90987 (25.02) | 4134 (21.58) |  |
| 2 | 96139 (25.12) | 91601 (25.19) | 4538 (23.68) |  |
| 3 | 95876 (25.05) | 91343 (25.12) | 4533 (23.55) |  |
| 4 (most deprived) | 95655 (24.99) | 89763 (24.68) | 5892 (31.19) |  |
| Educational attainment, n(%) |  |  |  | <0.001 |
| Degree | 125082 (32.68) | 120556 (33.15) | 4526 (22.97) |  |
| A-level or equivalent | 42842 (11.19) | 41200 (11.33) | 1642 (8.36) |  |
| O-level/GCSE/CSE | 100607 (26.28) | 95977 (26.39) | 4630 (24.07) |  |
| Vocational/Professional | 45198 (11.81) | 42642 (11.72) | 2556 (13.40) |  |
| No qualification/Unknown | 69062 (18.04) | 63319 (17.41) | 5743 (31.19) |  |
| Ethnic background, n(%) |  |  |  | 0.013 |
| White | 365082 (95.37) | 346848 (95.37) | 18234 (95.47) |  |
| Mixed | 2094 (0.55) | 2009 (0.55) | 85 (0.45) |  |
| Asian or Asian British | 6826 (1.78) | 6479 (1.78) | 347 (1.78) |  |
| Black or Black British | 4713 (1.23) | 4471 (1.23) | 242 (1.27) |  |
| Chinese | 1068 (0.28) | 1037 (0.29) | 31 (0.15) |  |
| Other/Unknown | 3008 (0.79) | 2850 (0.78) | 158 (0.88) |  |
| Average total household income before tax, n(%) |  |  |  | <0.001 |
| Less than 18,000 | 97872 (25.57) | 89809 (24.69) | 8063 (43.23) |  |
| 18,000 to 30,999 | 96790 (25.29) | 91654 (25.20) | 5136 (27.04) |  |
| 31,000 to 51,999 | 99764 (26.06) | 96180 (26.45) | 3584 (18.29) |  |
| 52,000 to 100,000 | 70445 (18.40) | 68561 (18.85) | 1884 (9.41) |  |
| Greater than 100,000 | 17920 (4.68) | 17490 (4.81) | 430 (2.03) |  |
| Employment Status, n(%) |  |  |  | <0.001 |
| Other/Unknown | 3775 (0.99) | 3552 (0.98) | 223 (1.13) |  |
| Employed | 208507 (54.47) | 202106 (55.57) | 6401 (32.31) |  |
| Retired | 136762 (35.73) | 126599 (34.81) | 10163 (54.13) |  |
| Homemaker | 9515 (2.49) | 9206 (2.53) | 309 (1.56) |  |
| Sick/Disabled | 14721 (3.85) | 13164 (3.62) | 1557 (8.43) |  |
| Unemployed | 6860 (1.79) | 6519 (1.79) | 341 (1.94) |  |
| Unpaid or voluntary work | 1716 (0.45) | 1639 (0.45) | 77 (0.39) |  |
| Full or part-time student | 935 (0.24) | 909 (0.25) | 26 (0.12) |  |
| Smoking status, n(%) |  |  |  | <0.001 |
| Never | 207033 (54.09) | 198240 (54.51) | 8793 (45.70) |  |
| Previous | 134483 (35.13) | 126761 (34.85) | 7722 (40.06) |  |
| Current | 39760 (10.39) | 37332 (10.26) | 2428 (13.43) |  |
| Alcohol drinker status, n(%) |  |  |  | <0.001 |
| Never | 16042 (4.19) | 14887 (4.09) | 1155 (6.08) |  |
| Previous | 13577 (3.55) | 12463 (3.43) | 1114 (5.80) |  |
| Current | 352339 (92.04) | 335598 (92.27) | 16741 (87.57) |  |
| Physical activity level, n(%) |  |  |  | <0.001 |
| Non-enough physical activity | 99905 (26.10) | 93748 (25.78) | 6157 (32.70) |  |
| Enough physical activity | 282886 (73.90) | 269946 (74.22) | 12940 (67.30) |  |
| Alcohol consumption, n(%) |  |  |  | <0.001 |
| 0-14 UK units/week | 311587 (81.40) | 295794 (81.33) | 15793 (82.32) |  |
| ≥14 UK units/week | 71204 (18.60) | 67900 (18.67) | 3304 (17.68) |  |
| The sum of healthy diet, n(%) |  |  |  | <0.001 |
| 0-5 servings | 90876 (23.74) | 86116 (23.68) | 4760 (25.87) |  |
| ≥5 servings | 291915 (76.26) | 277578 (76.32) | 14337 (74.13) |  |
| Sleep duration, n(%) |  |  |  | <0.001 |
| ≤6 or ≥9 hour/d | 123475 (32.26) | 116161 (31.94) | 7314 (37.89) |  |
| 7-8 hour/d | 259316 (67.74) | 247533 (68.06) | 11783 (62.11) |  |
| Chronotype, n(%) |  |  |  | 0.417 |
| Tend to be a "morning person" | 253028 (66.10) | 240457 (66.12) | 12571 (66.38) |  |
| Tend to be a "evening person" | 129763 (33.90) | 123237 (33.88) | 6526 (33.62) |  |
| Insomnia, n(%) |  |  |  | <0.001 |
| Low-Freq (Never, rarely, sometimes) | 274109 (71.61) | 261544 (71.91) | 12565 (66.48) |  |
| High-Freq (Usually) | 108682 (28.39) | 102150 (28.09) | 6532 (33.52) |  |
| Snoring, n(%) |  |  |  | <0.001 |
| No | 137962 (36.04) | 130861 (35.98) | 7101 (34.95) |  |
| Yes | 244829 (63.96) | 232833 (64.02) | 11996 (65.05) |  |
| Daytime dozing, n(%) |  |  |  | <0.001 |
| Low-Freq (Never, rarely, sometimes) | 372132 (97.22) | 353957 (97.32) | 18175 (95.47) |  |
| High-Freq (Often, all the time) | 10659 (2.78) | 9737 (2.68) | 922 (4.53) |  |
| LDL Cholesterol, Mean ± SD | 1.74 ± 0.34 | 1.74 ± 0.34 | 1.71 ± 0.36 | <0.001 |
| Total Cholesterol, Mean ± SD | 4.62 ± 0.71 | 4.62 ± 0.71 | 4.57 ± 0.75 | <0.001 |
| Elevated WC, n(%) | 129930 (33.94) | 121121 (33.30) | 8809 (46.13) | <0.001 |
| Elevated TG, n(%) | 154495 (40.36) | 145607 (40.04) | 8888 (46.54) | <0.001 |
| Elevated BP or blood pressure medication, n (%) | 286032 (74.72) | 269983 (74.23) | 16049 (84.04) | <0.001 |
| Elevated HbA1c or insulin use, n(%) | 73639 (19.24) | 67662 (18.60) | 5977 (31.30) | <0.001 |
| Reduced HDL or cholesterol lowering medication, n(%) | 127416 (33.29) | 118457 (32.57) | 8959 (46.91) | <0.001 |

**Table S3.** Baseline characteristics of the study population (unweighted).

1. Continuous data are presented as mean ± standard deviation (Mean ± SD), and categorical data as n (%).

2. P-values were calculated as follows:

(1) For continuous variables: the Mann-Whitney U test (Wilcoxon rank-sum test) was used for two-group comparisons.

(2) For categorical variables: the Pearson chi-squared test was used.

All P-values are reported to 3 decimal places.

| Variables | Total  (n = 382791) | No UTI  (n = 363694) | UUTI  (n = 1543) | LUTI  (n = 1785) | UTI, NOS  (n = 15769) | P |
| --- | --- | --- | --- | --- | --- | --- |
| Sex, n(%) |  |  |  |  |  | <0.001 |
| Female | 204730 (51.75) | 195227 (51.92) | 957 (61.36) | 898 (48.92) | 7648 (47.13) |  |
| Male | 178061 (48.25) | 168467 (48.08) | 586 (38.64) | 887 (51.08) | 8121 (52.87) |  |
| Age at recruitment, Mean ± SD | 57.27 ± 7.97 | 57.07 ± 7.97 | 58.13 ± 7.88 | 61.21 ± 6.68 | 61.25 ± 6.84 | <0.001 |
| BMI, Mean ± SD | 26.91 ± 4.49 | 26.87 ± 4.46 | 27.71 ± 5.34 | 27.39 ± 4.74 | 27.61 ± 4.96 | <0.001 |
| Whole body fat mass, Mean ± SD | 23.62 ± 9.13 | 23.56 ± 9.08 | 25.66 ± 10.52 | 24.68 ± 9.78 | 24.64 ± 10.10 | <0.001 |
| Body fat percentage, Mean ± SD | 30.40 ± 8.68 | 30.37 ± 8.66 | 32.52 ± 8.99 | 31.06 ± 8.85 | 30.85 ± 9.14 | <0.001 |
| Waist-to-Hip Ratio, Mean ± SD |  |  |  |  |  |  |
| Townsend deprivation index at recruitment, n(%) |  |  |  |  |  | <0.001 |
| 1 (least deprived) | 95121 (24.36) | 90987 (24.50) | 317 (20.06) | 427 (23.96) | 3390 (21.46) |  |
| 2 | 96139 (24.88) | 91601 (24.94) | 348 (22.59) | 452 (25.44) | 3738 (23.59) |  |
| 3 | 95876 (25.06) | 91343 (25.14) | 369 (23.74) | 390 (21.22) | 3774 (23.79) |  |
| 4 (most deprived) | 95655 (25.70) | 89763 (25.42) | 509 (33.62) | 516 (29.39) | 4867 (31.16) |  |
| Educational attainment, n(%) |  |  |  |  |  | <0.001 |
| Degree | 125082 (30.88) | 120556 (31.29) | 379 (23.53) | 438 (23.60) | 3709 (22.85) |  |
| A-level or equivalent | 42842 (10.93) | 41200 (11.06) | 150 (9.46) | 136 (7.40) | 1356 (8.36) |  |
| O-level/GCSE/CSE | 100607 (26.35) | 95977 (26.47) | 414 (26.23) | 459 (25.21) | 3757 (23.74) |  |
| Vocational/Professional | 45198 (12.28) | 42642 (12.22) | 199 (12.82) | 233 (13.19) | 2124 (13.48) |  |
| No qualification/Unknown | 69062 (19.56) | 63319 (18.96) | 401 (27.97) | 519 (30.59) | 4823 (31.57) |  |
| Ethnic background, n(%) |  |  |  |  |  | <0.001 |
| White | 365082 (95.21) | 346848 (95.19) | 1439 (93.91) | 1724 (96.85) | 15071 (95.47) |  |
| Mixed | 2094 (0.53) | 2009 (0.53) | 16 (1.00) | 7 (0.34) | 62 (0.41) |  |
| Asian or Asian British | 6826 (1.89) | 6479 (1.90) | 45 (2.56) | 25 (1.39) | 277 (1.75) |  |
| Black or Black British | 4713 (1.30) | 4471 (1.30) | 25 (1.47) | 16 (0.80) | 201 (1.30) |  |
| Chinese | 1068 (0.27) | 1037 (0.27) | 1 (0.03) | 1 (0.06) | 29 (0.17) |  |
| Other/Unknown | 3008 (0.81) | 2850 (0.81) | 17 (1.04) | 12 (0.56) | 129 (0.89) |  |
| Average total household income before tax, n(%) |  |  |  |  |  | <0.001 |
| Less than 18,000 | 97872 (27.47) | 89809 (26.66) | 591 (39.33) | 698 (39.48) | 6774 (44.02) |  |
| 18,000 to 30,999 | 96790 (25.85) | 91654 (25.79) | 375 (24.36) | 477 (27.27) | 4284 (27.27) |  |
| 31,000 to 51,999 | 99764 (25.42) | 96180 (25.79) | 337 (21.42) | 354 (19.46) | 2893 (17.86) |  |
| 52,000 to 100,000 | 70445 (17.08) | 68561 (17.48) | 191 (11.96) | 198 (10.71) | 1495 (9.02) |  |
| Greater than 100,000 | 17920 (4.17) | 17490 (4.28) | 49 (2.92) | 58 (3.08) | 323 (1.83) |  |
| Employment Status, n(%) |  |  |  |  |  | <0.001 |
| Other/Unknown | 3775 (1.00) | 3552 (0.99) | 21 (1.14) | 17 (0.86) | 185 (1.16) |  |
| Employed | 208507 (52.25) | 202106 (53.28) | 692 (42.90) | 629 (34.51) | 5080 (31.06) |  |
| Retired | 136762 (37.67) | 126599 (36.82) | 610 (40.81) | 969 (56.13) | 8584 (55.17) |  |
| Homemaker | 9515 (2.31) | 9206 (2.35) | 33 (2.47) | 31 (1.58) | 245 (1.47) |  |
| Sick/Disabled | 14721 (4.24) | 13164 (4.02) | 134 (9.28) | 115 (5.47) | 1308 (8.68) |  |
| Unemployed | 6860 (1.87) | 6519 (1.87) | 40 (2.69) | 18 (1.13) | 283 (1.96) |  |
| Unpaid or voluntary work | 1716 (0.43) | 1639 (0.43) | 10 (0.56) | 5 (0.27) | 62 (0.38) |  |
| Full or part-time student | 935 (0.23) | 909 (0.23) | 3 (0.16) | 1 (0.05) | 22 (0.12) |  |
| Smoking status, n(%) |  |  |  |  |  | <0.001 |
| Never | 207033 (52.84) | 198240 (53.21) | 753 (46.92) | 825 (46.32) | 7215 (45.52) |  |
| Previous | 134483 (35.88) | 126761 (35.67) | 581 (37.83) | 739 (41.18) | 6402 (40.15) |  |
| Current | 39760 (10.86) | 37332 (10.73) | 188 (13.84) | 210 (12.08) | 2030 (13.54) |  |
| Alcohol drinker status, n(%) |  |  |  |  |  | <0.001 |
| Never | 16042 (4.47) | 14887 (4.38) | 112 (7.38) | 105 (5.51) | 938 (6.02) |  |
| Previous | 13577 (3.80) | 12463 (3.70) | 95 (6.33) | 72 (3.88) | 947 (5.97) |  |
| Current | 352339 (91.49) | 335598 (91.69) | 1326 (85.60) | 1605 (90.46) | 13810 (87.44) |  |
| Physical activity level, n(%) |  |  |  |  |  | <0.001 |
| Non-enough physical activity | 99905 (27.47) | 93748 (27.20) | 485 (31.83) | 574 (31.46) | 5098 (32.93) |  |
| Enough physical activity | 282886 (72.53) | 269946 (72.80) | 1058 (68.17) | 1211 (68.54) | 10671 (67.07) |  |
| Alcohol consumption, n(%) |  |  |  |  |  | <0.001 |
| 0-14 UK units/week | 311587 (81.43) | 295794 (81.38) | 1309 (85.09) | 1478 (82.46) | 13006 (82.05) |  |
| ≥14 UK units/week | 71204 (18.57) | 67900 (18.62) | 234 (14.91) | 307 (17.54) | 2763 (17.95) |  |
| The sum of healthy diet, n(%) |  |  |  |  |  | <0.001 |
| 0-5 servings | 90876 (24.25) | 86116 (24.16) | 387 (26.78) | 464 (26.69) | 3909 (25.69) |  |
| ≥5 servings | 291915 (75.75) | 277578 (75.84) | 1156 (73.22) | 1321 (73.31) | 11860 (74.31) |  |
| Sleep duration, n(%) |  |  |  |  |  | <.0001 |
| ≤6 or ≥9 hour/d | 123475 (32.31) | 116161 (32.03) | 602 (37.91) | 643 (35.07) | 6069 (38.20) |  |
| 7-8 hour/d | 259316 (67.69) | 247533 (67.97) | 941 (62.09) | 1142 (64.93) | 9700 (61.80) |  |
| Chronotype, n(%) |  |  |  |  |  | 0.870 |
| Tend to be a "morning person" | 253028 (66.46) | 240457 (66.46) | 1002 (65.79) | 1166 (65.81) | 10403 (66.51) |  |
| Tend to be a "evening person" | 129763 (33.54) | 123237 (33.54) | 541 (34.21) | 619 (34.19) | 5366 (33.49) |  |
| Insomnia, n(%) |  |  |  |  |  | <0.001 |
| Low-Freq (Never, rarely, sometimes) | 274109 (71.71) | 261544 (71.98) | 980 (64.53) | 1170 (65.80) | 10415 (66.75) |  |
| High-Freq (Usually) | 108682 (28.29) | 102150 (28.02) | 563 (35.47) | 615 (34.20) | 5354 (33.25) |  |
| Snoring, n(%) |  |  |  |  |  | 0.655 |
| No | 137962 (34.87) | 130861 (34.86) | 568 (34.66) | 698 (36.24) | 5835 (34.83) |  |
| Yes | 244829 (65.13) | 232833 (65.14) | 975 (65.34) | 1087 (63.76) | 9934 (65.17) |  |
| Daytime dozing, n(%) |  |  |  |  |  | <0.001 |
| Low-Freq (Never, rarely, sometimes) | 372132 (97.28) | 353957 (97.37) | 1477 (95.85) | 1711 (96.14) | 14987 (95.36) |  |
| High-Freq (Often, all the time) | 10659 (2.72) | 9737 (2.63) | 66 (4.15) | 74 (3.86) | 782 (4.64) | <0.001 |
| LDL Cholesterol, Mean ± SD | 1.75 ± 0.34 | 1.75 ± 0.34 | 1.74 ± 0.37 | 1.71 ± 0.34 | 1.71 ± 0.36 | <0.001 |
| Total Cholesterol, Mean ± SD | 4.65 ± 0.70 | 4.65 ± 0.70 | 4.64 ± 0.75 | 4.56 ± 0.73 | 4.56 ± 0.76 | <0.001 |
| Elevated WC, n(%) | 129930 (26.96) | 121121 (26.63) | 687 (33.88) | 763 (30.12) | 7359 (33.68) | <0.001 |
| Elevated TG, n(%) | 154495 (34.26) | 145607 (34.19) | 713 (37.16) | 879 (38.76) | 7296 (35.20) | <0.001 |
| Elevated BP or blood pressure medication, n (%) | 286032 (73.07) | 269983 (72.70) | 1188 (73.67) | 1494 (80.99) | 13367 (81.00) | <0.001 |
| Elevated HbA1c or insulin use, n(%) | 73639 (14.04) | 67662 (13.71) | 454 (21.35) | 486 (18.10) | 5037 (20.72) | <0.001 |
| Reduced HDL or cholesterol lowering medication, n(%) | 127416 (26.59) | 118457 (26.18) | 682 (34.24) | 814 (33.69) | 7463 (34.54) | <0.001 |

**Table S4.** Baseline characteristics of the study population by UTI subtype (IPW-weighted percentages and P-values).

1. Continuous data are presented as mean ± standard deviation (Mean ± SD), and categorical data as n (%).

2. P-values were calculated as follows:

(1) For continuous variables: weighted one-way analysis of variance (ANOVA) was used for comparisons of the four groups.

(2) For categorical variables: the weighted Pearson chi-squared test was used.

All P-values are reported to 3 decimal places.

| Variables | Overall  (n = 382791) | No Mets  (n = 251137) | Mets  (n = 131654) | *P* |
| --- | --- | --- | --- | --- |
|
| Sex, n(%) |  |  |  | 0.007 |
| Female | 204730 (51.75) | 141984 (51.83) | 62746 (51.49) |  |
| Male | 178061 (48.25) | 109153 (48.17) | 68908 (48.51) |  |
| Age at recruitment, Mean ± SD | 57.27 ± 7.97 | 57.25 ± 8.00 | 57.33 ± 7.87 | 0.002 |
| BMI, Mean ± SD | 26.91 ± 4.49 | 25.83 ± 3.69 | 30.84 ± 4.92 | <0.001 |
| Whole body fat mass, Mean ± SD | 23.62 ± 9.13 | 21.60 ± 7.67 | 30.96 ± 10.21 | <0.001 |
| Body fat percentage, Mean ± SD | 30.40 ± 8.68 | 29.15 ± 8.31 | 34.94 ± 8.51 | <0.001 |
| Waist-to-Hip Ratio, Mean ± SD | 0.87 ± 0.09 | 0.85 ± 0.08 | 0.92 ± 0.08 |  |
| UTI Diagnosis, n(%) | 190097 (4.90) | 9505 (4.51) | 9592 (6.32) | <0.001 |
| Townsend deprivation index at recruitment, n(%) |  |  |  | 0.228 |
| 1 *(least deprived)* | 95121 (24.36) | 65884 (24.39) | 29237 (24.23) |  |
| 2 | 96139 (24.88) | 64855 (24.91) | 31284 (24.78) |  |
| 3 | 95876 (25.06) | 62816 (25.07) | 33060 (25.02) |  |
| 4 *(most deprived)* | 95655 (25.70) | 57582 (25.63) | 38073 (25.97) |  |
| Educational attainment, n(%) |  |  |  | 0.099 |
| Degree | 125082 (30.88) | 92235 (30.95) | 32847 (30.63) |  |
| A-level or equivalent | 42842 (10.93) | 29751 (10.94) | 13091 (10.89) |  |
| O-level/GCSE/CSE | 100607 (26.35) | 65901 (26.35) | 34706 (26.34) |  |
| Vocational/Professional | 45198 (12.28) | 27191 (12.28) | 18007 (12.30) |  |
| No qualification/Unknown | 69062 (19.56) | 36059 (19.47) | 33003 (19.85) |  |
| Ethnic background, n(%) |  |  |  | 0.073 |
| White | 365082 (95.21) | 241032 (95.24) | 124050 (95.10) |  |
| Mixed | 2094 (0.53) | 1434 (0.53) | 660 (0.53) |  |
| Asian or Asian British | 6826 (1.89) | 3269 (1.86) | 3557 (2.02) |  |
| Black or Black British | 4713 (1.30) | 2778 (1.30) | 1935 (1.30) |  |
| Chinese | 1068 (0.27) | 788 (0.27) | 280 (0.27) |  |
| Other/Unknown | 3008 (0.81) | 1836 (0.81) | 1172 (0.80) |  |
| Average total household income before tax, n(%) |  |  |  | 0.040 |
| Less than 18,000 | 97872 (27.47) | 52553 (27.37) | 45319 (27.83) |  |
| 18,000 to 30,999 | 96790 (25.85) | 61386 (25.85) | 35404 (25.84) |  |
| 31,000 to 51,999 | 99764 (25.42) | 69576 (25.44) | 30188 (25.35) |  |
| 52,000 to 100,000 | 70445 (17.08) | 53302 (17.14) | 17143 (16.88) |  |
| Greater than 100,000 | 17920 (4.17) | 14320 (4.19) | 3600 (4.10) |  |
| Employment Status, n(%) |  |  |  | <0.001 |
| Other/Unknown | 3775 (1.00) | 2388 (1.00) | 1387 (1.01) |  |
| Employed | 208507 (52.25) | 150154 (52.35) | 58353 (51.91) |  |
| Retired | 136762 (37.67) | 78792 (37.62) | 57970 (37.86) |  |
| Homemaker | 9515 (2.31) | 7078 (2.33) | 2437 (2.24) |  |
| Sick/Disabled | 14721 (4.24) | 6552 (4.17) | 8169 (4.49) |  |
| Unemployed | 6860 (1.87) | 4221 (1.88) | 2639 (1.86) |  |
| Unpaid or voluntary work | 1716 (0.43) | 1222 (0.44) | 494 (0.41) |  |
| Full or part-time student | 935 (0.23) | 730 (0.23) | 205 (0.23) |  |
| Smoking status, n(%) |  |  |  | 0.495 |
| Never | 207033 (52.84) | 144000 (52.88) | 63033 (52.67) |  |
| Previous | 134483 (35.88) | 82136 (35.84) | 52347 (36.04) |  |
| Current | 39760 (10.86) | 24197 (10.86) | 15563 (10.85) |  |
| Alcohol drinker status, n(%) |  |  |  | 0.039 |
| Never | 16042 (4.47) | 8557 (4.43) | 7485 (4.59) |  |
| Previous | 13577 (3.80) | 7356 (3.78) | 6221 (3.88) |  |
| Current | 352339 (91.49) | 234786 (91.54) | 117553 (91.30) |  |
| Physical activity level, n(%) |  |  |  | 0.006 |
| Non-enough physical activity | 99905 (27.47) | 56975 (27.37) | 42930 (27.83) |  |
| Enough physical activity | 282886 (72.53) | 194162 (72.63) | 88724 (72.17) |  |
| Alcohol consumption, n(%) |  |  |  | 0.649 |
| 0-14 UK units/week | 311587 (81.43) | 203657 (81.41) | 107930 (81.48) |  |
| ≥14 UK units/week | 71204 (18.57) | 47480 (18.59) | 23724 (18.52) |  |
| The sum of healthy diet, n(%) |  |  |  | 0.963 |
| 0-5 servings | 90876 (24.25) | 57947 (24.25) | 32929 (24.25) |  |
| ≥5 servings | 291915 (75.75) | 193190 (75.75) | 98725 (75.75) |  |
| Sleep duration, n(%) |  |  |  | <0.001 |
| ≤6 or ≥9 hour/d | 123475 (32.31) | 75332 (31.53) | 48143 (35.18) |  |
| 7-8 hour/d | 259316 (67.69) | 175805 (68.47) | 83511 (64.82) |  |
| Chronotype, n(%) |  |  |  | <0.001 |
| Tend to be a "morning person" | 253028 (66.46) | 166986 (66.96) | 86042 (64.66) |  |
| Tend to be a "evening person" | 129763 (33.54) | 84151 (33.04) | 45612 (35.34) |  |
| Insomnia, n(%) |  |  |  | <0.001 |
| Low-Freq (Never, rarely, sometimes) | 274109 (71.71) | 184372 (72.38) | 89737 (69.27) |  |
| High-Freq (Usually) | 108682 (28.29) | 66765 (27.62) | 41917 (30.73) |  |
| Snoring, n(%) |  |  |  | <0.001 |
| No | 137962 (34.87) | 77465 (31.79) | 60497 (46.05) |  |
| Yes | 244829 (65.13) | 173672 (68.21) | 71157 (53.95) |  |
| Daytime dozing, n(%) |  |  |  | <0.001 |
| Low-Freq (Never, rarely, sometimes) | 372132 (97.28) | 245554 (97.47) | 126578 (96.60) |  |
| High-Freq (Often, all the time) | 10659 (2.72) | 5583 (2.53) | 5076 (3.40) |  |
| LDL Cholesterol, Mean ± SD | 1.75 ± 0.34 | 1.75 ± 0.33 | 1.74 ± 0.36 | 0.007 |
| Total Cholesterol, Mean ± SD | 4.65 ± 0.70 | 4.69 ± 0.68 | 4.50 ± 0.76 | <0.001 |

**Table S5.** Baseline characteristics of the study population by MetS status (IPW-weighted percentages and P-values).

1. Continuous data are presented as mean ± standard deviation (Mean ± SD), and categorical data as n (%).

2. P-values were calculated as follows:

(1) For continuous variables: the weighted t-test was used for two-group comparisons.

(2) For categorical variables: the weighted Pearson chi-squared test was used.

All P-values are reported to 3 decimal places.

| Variables | Total  (n = 382791) | nMetS=0  (n = 48248) | nMetS=1  (n = 105765) | nMetS=2  (n = 97124) | nMetS=3  (n = 72022) | nMetS=4  (n = 42727) | nMetS=5  (n = 16905) | *P* |
| --- | --- | --- | --- | --- | --- | --- | --- | --- |
| Sex, n(%) |  |  |  |  |  |  |  | <0.001 |
| Female | 204730 (51.75) | 34701 (68.00) | 60805 (53.26) | 46478 (44.01) | 33540 (50.43) | 20822 (52.71) | 8384 (53.35) |  |
| Male | 178061 (48.25) | 13547 (32.00) | 44960 (46.74) | 50646 (55.99) | 38482 (49.57) | 21905 (47.29) | 8521 (46.65) |  |
| Age at recruitment, Mean ± SD | 57.27 ± 7.97 | 53.26 ± 7.87 | 57.27 ± 7.90 | 58.80 ± 7.59 | 56.73 ± 8.04 | 57.76 ± 7.72 | 59.12 ± 7.07 | <0.001 |
| BMI, Mean ± SD | 26.91 ± 4.49 | 23.79 ± 2.73 | 25.12 ± 3.06 | 27.33 ± 3.97 | 29.67 ± 4.55 | 31.85 ± 4.82 | 33.82 ± 5.11 | <0.001 |
| Whole body fat mass, Mean ± SD | 23.62 ± 9.13 | 18.67 ± 5.93 | 20.30 ± 6.58 | 24.04 ± 8.51 | 28.80 ± 9.65 | 32.89 ± 10.01 | 36.22 ± 10.42 | <0.001 |
| Body fat percentage, Mean ± SD | 30.40 ± 8.68 | 27.78 ± 7.76 | 28.37 ± 8.09 | 30.47 ± 8.53 | 33.69 ± 8.59 | 36.15 ± 8.18 | 37.80 ± 7.76 | <0.001 |
| Waist-to-Hip Ratio, Mean ± SD | 0.87 ± 0.09 | 0.81 ± 0.07 | 0.84 ± 0.08 | 0.89 ± 0.08 | 0.91 ± 0.08 | 0.93 ± 0.08 | 0.96 ± 0.08 | <0.001 |
| UTI Diagnosis, n(%) | 19097 (4.90) | 1177 (2.87) | 3787 (4.20) | 4541 (5.47) | 4400 (5.29) | 3347 (6.85) | 1845 (9.91) | <0.001 |
| Townsend deprivation index at recruitment, n(%) |  |  |  |  |  |  |  | <0.001 |
| 1 *(least deprived)* | 95121 (24.36) | 12431 (24.30) | 28670 (25.29) | 24783 (23.53) | 17005 (25.59) | 9035 (23.06) | 3197 (20.82) |  |
| 2 | 96139 (24.88) | 12187 (24.46) | 27453 (25.12) | 25215 (24.88) | 17788 (25.52) | 9982 (24.41) | 3514 (22.15) |  |
| 3 | 95876 (25.06) | 12168 (25.30) | 26504 (25.20) | 24144 (24.85) | 18043 (24.90) | 10805 (25.36) | 4212 (24.71) |  |
| 4 *(most deprived)* | 95655 (25.70) | 11462 (25.94) | 23138 (24.39) | 22982 (26.74) | 19186 (24.00) | 12905 (27.17) | 5982 (32.32) |  |
| Educational attainment, n(%) |  |  |  |  |  |  |  | <0.001 |
| Degree | 125082 (30.88) | 21661 (39.98) | 39729 (32.04) | 30845 (26.30) | 19452 (32.84) | 10025 (28.85) | 3370 (24.63) |  |
| A-level or equivalent | 42842 (10.93) | 6470 (12.93) | 12672 (11.18) | 10609 (9.93) | 7533 (11.36) | 4068 (10.50) | 1490 (9.66) |  |
| O-level/GCSE/CSE | 100607 (26.35) | 12405 (26.64) | 27666 (26.38) | 25830 (26.22) | 19227 (26.43) | 11267 (26.53) | 4212 (25.35) |  |
| Vocational/Professional | 45198 (12.28) | 3915 (9.40) | 11195 (11.97) | 12081 (13.71) | 9677 (11.92) | 5877 (12.50) | 2453 (13.62) |  |
| No qualification/Unknown | 69062 (19.56) | 3797 (11.05) | 14503 (18.43) | 17759 (23.83) | 16133 (17.45) | 11490 (21.63) | 5380 (26.74) |  |
| Ethnic background, n(%) |  |  |  |  |  |  |  | <0.001 |
| White | 365082 (95.21) | 46218 (95.11) | 101954 (95.78) | 92860 (94.75) | 68120 (95.42) | 40012 (94.58) | 15918 (94.91) |  |
| Mixed | 2094 (0.53) | 374 (0.73) | 579 (0.52) | 481 (0.46) | 342 (0.51) | 236 (0.57) | 82 (0.50) |  |
| Asian or Asian British | 6826 (1.89) | 546 (1.58) | 1184 (1.58) | 1539 (2.24) | 1720 (1.76) | 1295 (2.29) | 542 (2.55) |  |
| Black or Black British | 4713 (1.30) | 480 (1.20) | 1104 (1.20) | 1194 (1.43) | 1066 (1.28) | 701 (1.46) | 168 (0.95) |  |
| Chinese | 1068 (0.27) | 203 (0.37) | 314 (0.26) | 271 (0.23) | 162 (0.28) | 92 (0.27) | 26 (0.19) |  |
| Other/Unknown | 3008 (0.81) | 427 (1.00) | 630 (0.66) | 779 (0.89) | 612 (0.76) | 391 (0.83) | 169 (0.90) |  |
| Average total household income before tax, n(%) |  |  |  |  |  |  |  | <0.001 |
| Less than 18,000 | 97872 (27.47) | 7027 (19.06) | 20934 (25.75) | 24592 (32.26) | 21990 (24.27) | 15737 (30.30) | 7592 (38.57) |  |
| 18,000 to 30,999 | 96790 (25.85) | 9793 (22.04) | 26062 (26.14) | 25531 (27.08) | 19500 (25.59) | 11437 (25.99) | 4467 (26.68) |  |
| 31,000 to 51,999 | 99764 (25.42) | 14365 (28.79) | 29796 (26.12) | 25415 (23.45) | 17718 (26.74) | 9415 (24.59) | 3055 (20.61) |  |
| 52,000 to 100,000 | 70445 (17.08) | 12912 (23.20) | 22891 (17.70) | 17499 (14.19) | 10490 (18.60) | 5141 (15.69) | 1512 (11.73) |  |
| Greater than 100,000 | 17920 (4.17) | 4151 (6.91) | 6082 (4.29) | 4087 (3.02) | 2324 (4.81) | 997 (3.43) | 279 (2.41) |  |
| Employment Status, n(%) |  |  |  |  |  |  |  | <0.001 |
| Other/Unknown | 3775 (1.00) | 433 (0.97) | 956 (0.95) | 999 (1.06) | 713 (0.95) | 474 (1.07) | 200 (1.17) |  |
| Employed | 208507 (52.25) | 35321 (67.79) | 63515 (53.14) | 51318 (45.46) | 34394 (55.33) | 18081 (49.70) | 5878 (41.17) |  |
| Retired | 136762 (37.67) | 8192 (21.46) | 33427 (37.54) | 37173 (44.09) | 30379 (35.67) | 19309 (39.35) | 8282 (44.47) |  |
| Homemaker | 9515 (2.31) | 2064 (3.73) | 3025 (2.39) | 1989 (1.70) | 1332 (2.27) | 780 (2.16) | 325 (2.28) |  |
| Sick/Disabled | 14721 (4.24) | 948 (3.22) | 2358 (3.55) | 3246 (5.16) | 3486 (3.44) | 2956 (5.12) | 1727 (7.91) |  |
| Unemployed | 6860 (1.87) | 780 (1.87) | 1660 (1.75) | 1781 (2.00) | 1332 (1.69) | 904 (1.99) | 403 (2.34) |  |
| Unpaid or voluntary work | 1716 (0.43) | 290 (0.57) | 527 (0.45) | 405 (0.37) | 263 (0.39) | 168 (0.43) | 63 (0.42) |  |
| Full or part-time student | 935 (0.23) | 220 (0.38) | 297 (0.22) | 213 (0.17) | 123 (0.25) | 55 (0.17) | 27 (0.24) |  |
| Smoking status, n(%) |  |  |  |  |  |  |  | <0.001 |
| Never | 207033 (52.84) | 29643 (57.95) | 61916 (54.38) | 52441 (49.40) | 35991 (54.65) | 19976 (51.51) | 7066 (46.18) |  |
| Previous | 134483 (35.88) | 14094 (31.30) | 33923 (35.00) | 34119 (38.46) | 27610 (34.68) | 17340 (36.88) | 7397 (40.43) |  |
| Current | 39760 (10.86) | 4390 (10.43) | 9601 (10.22) | 10206 (11.66) | 8066 (10.28) | 5166 (11.16) | 2331 (12.84) |  |
| Alcohol drinker status, n(%) |  |  |  |  |  |  |  | <0.001 |
| Never | 16042 (4.47) | 1477 (3.91) | 3384 (4.14) | 3696 (4.93) | 3512 (3.91) | 2646 (5.04) | 1327 (6.64) |  |
| Previous | 13577 (3.80) | 1352 (3.61) | 2953 (3.60) | 3051 (4.02) | 2843 (3.24) | 2171 (4.24) | 1207 (6.08) |  |
| Current | 352339 (91.49) | 45354 (92.29) | 99258 (92.03) | 90174 (90.77) | 65476 (92.65) | 37766 (90.46) | 14311 (86.99) |  |
| Physical activity level, n(%) |  |  |  |  |  |  |  | <0.001 |
| Enough physical activity | 99905 (27.47) | 9827 (24.29) | 22511 (25.60) | 24637 (30.35) | 21185 (24.94) | 14901 (30.22) | 6844 (35.45) |  |
| Non-enough physical activity | 282886 (72.53) | 38421 (75.71) | 83254 (74.40) | 72487 (69.65) | 50837 (75.06) | 27826 (69.78) | 10061 (64.55) |  |
| Alcohol consumption, n(%) |  |  |  |  |  |  |  | <0.001 |
| 0-14 UK units/week | 311587 (81.43) | 41497 (86.29) | 85365 (81.08) | 76795 (79.81) | 57765 (79.71) | 35617 (83.10) | 14548 (85.71) |  |
| ≥14 UK units/week | 71204 (18.57) | 6751 (13.71) | 20400 (18.92) | 20329 (20.19) | 14257 (20.29) | 7110 (16.90) | 2357 (14.29) |  |
| The sum of healthy diet, n(%) |  |  |  |  |  |  |  | <0.001 |
| 0-5 servings | 90876 (24.25) | 10759 (23.35) | 23441 (23.22) | 23747 (25.61) | 17964 (24.21) | 10738 (24.34) | 4227 (24.22) |  |
| ≥5 servings | 291915 (75.75) | 37489 (76.65) | 82324 (76.78) | 73377 (74.39) | 54058 (75.79) | 31989 (75.66) | 12678 (75.78) |  |
| Sleep duration, n(%) |  |  |  |  |  |  |  | <.0001 |
| ≤6 or ≥9 hour/d | 123475 (32.31) | 13051 (28.55) | 31057 (30.76) | 31224 (33.46) | 25002 (33.47) | 16078 (36.28) | 7063 (40.49) |  |
| 7-8 hour/d | 259316 (67.69) | 35197 (71.45) | 74708 (69.24) | 65900 (66.54) | 47020 (66.53) | 26649 (63.72) | 9842 (59.51) |  |
| Chronotype, n(%) |  |  |  |  |  |  |  | 0.870 |
| Tend to be a "morning person" | 253028 (66.46) | 31670 (65.77) | 70665 (67.27) | 64651 (67.12) | 47330 (64.94) | 27920 (64.66) | 10792 (63.33) |  |
| Tend to be a "evening person" | 129763 (33.54) | 16578 (34.23) | 35100 (32.73) | 32473 (32.88) | 24692 (35.06) | 14807 (35.34) | 6113 (36.67) |  |
| Insomnia, n(%) |  |  |  |  |  |  |  | <0.001 |
| Low-Freq (Never, rarely, sometimes) | 274109 (71.71) | 36253 (73.93) | 77885 (72.74) | 70234 (71.41) | 50568 (71.13) | 28671 (68.15) | 10498 (63.19) |  |
| High-Freq (Usually) | 108682 (28.29) | 11995 (26.07) | 27880 (27.26) | 26890 (28.59) | 21454 (28.87) | 14056 (31.85) | 6407 (36.81) |  |
| Snoring, n(%) |  |  |  |  |  |  |  | 0.655 |
| No | 137962 (34.87) | 10677 (23.09) | 30642 (29.72) | 36146 (37.27) | 31572 (43.91) | 20364 (48.06) | 8561 (50.99) |  |
| Yes | 244829 (65.13) | 37571 (76.91) | 75123 (70.28) | 60978 (62.73) | 40450 (56.09) | 22363 (51.94) | 8344 (49.01) |  |
| Daytime dozing, n(%) |  |  |  |  |  |  |  | <0.001 |
| Low-Freq (Never, rarely, sometimes) | 372132 (97.28) | 47254 (97.62) | 103584 (97.67) | 94716 (97.21) | 69794 (97.26) | 40935 (96.26) | 15849 (94.35) |  |
| High-Freq (Often, all the time) | 10659 (2.72) | 994 (2.38) | 2181 (2.33) | 2408 (2.79) | 2228 (2.74) | 1792 (3.74) | 1056 (5.65) | <0.001 |
| LDL Cholesterol, Mean ± SD | 1.75 ± 0.34 | 1.69 ± 0.30 | 1.75 ± 0.32 | 1.77 ± 0.35 | 1.77 ± 0.36 | 1.73 ± 0.36 | 1.66 ± 0.36 | <0.001 |
| Total Cholesterol, Mean ± SD | 4.65 ± 0.70 | 4.66 ± 0.60 | 4.72 ± 0.65 | 4.66 ± 0.73 | 4.59 ± 0.75 | 4.44 ± 0.76 | 4.26 ± 0.75 | <0.001 |

**Table S6.** Baseline characteristics of the study population by nMetS (IPW-weighted percentages and P-values).

1. Continuous data are presented as mean ± standard deviation (Mean ± SD), and categorical data as n (%).

2. P-values were calculated as follows:

(1) For continuous variables: weighted one-way ANOVA was used for comparisons of the six groups.

(2) For categorical variables: the weighted Pearson chi-squared test was used.

All P-values are reported to 3 decimal places.

| No. of MetS Traits | Event/Total | Event rate (%) | HR (95%CI), model 1 | P-value | HR (95%CI), model 2 | P-value | HR (95%CI), model 3 | P-value |
| --- | --- | --- | --- | --- | --- | --- | --- | --- |
| 0 | 1177/48248 | 2.44 | Reference |  | Reference |  | Reference |  |
| 1 | 3787/105765 | 3.58 | 1.10 (1.07-1.13) | <0.001 | 1.08 (1.05-1.11) | <0.001 | 1.08 (1.04-1.11) | <0.001 |
| 2 | 4541/97124 | 4.68 | 1.20 (1.16-1.23) | <0.001 | 1.15 (1.12-1.19) | <0.001 | 1.14 (1.11-1.18) | <0.001 |
| 3 | 4400/72022 | 6.11 | 1.33 (1.29-1.37) | <0.001 | 1.25 (1.21-1.29) | <0.001 | 1.22 (1.18-1.26) | <0.001 |
| 4 | 3347/42727 | 7.83 | 1.49 (1.45-1.55) | <0.001 | 1.37 (1.32-1.41) | <0.001 | 1.30 (1.25-1.35) | <0.001 |
| 5 | 1845/16905 | 10.91 | 1.85 (1.77-1.93) | <0.001 | 1.64 (1.57-1.72) | <0.001 | 1.49 (1.43-1.57) | <0.001 |

**Table S7.** Association between nMetS and UTI Risk (Model 1, 2, 3 adjusted)

| No. of MetS Traits | Event/Total | Event rate (%) | HR (95%CI), model 1 | P-value | HR (95%CI), model 2 | P-value | HR (95%CI), model 3 | P-value |
| --- | --- | --- | --- | --- | --- | --- | --- | --- |
| 0 | 156/48248 | 0.32 | Reference |  | Reference |  | Reference |  |
| 1 | 304/105765 | 0.29 | 1.00 (0.96-1.03) | 0.875 | 1.00 (0.96-1.03) | 0.871 | 1.00 (0.96-1.03) | 0.872 |
| 2 | 349/97124 | 0.36 | 1.01 (0.97-1.04) | 0.748 | 1.01 (0.97-1.04) | 0.763 | 1.01 (0.97-1.04) | 0.766 |
| 3 | 357/72022 | 0.50 | 1.02 (0.98-1.06) | 0.262 | 1.02 (0.98-1.06) | 0.275 | 1.02 (0.98-1.06) | 0.287 |
| 4 | 234/42727 | 0.55 | 1.03 (0.99-1.07) | 0.197 | 1.03 (0.99-1.07) | 0.212 | 1.03 (0.98-1.07) | 0.228 |
| 5 | 143/16905 | 0.85 | 1.06 (1.00-1.12) | 0.040 | 1.06 (1.00-1.12) | 0.045 | 1.06 (1.00-1.11) | 0.052 |

Table S8.1The correlation between the number of MetS traits and UUTI risk

| No. of MetS Traits | Event/Total | Event rate (%) | HR (95%CI), model 1 | P-value | HR (95%CI), model 2 | P-value | HR (95%CI), model 3 | P-value |
| --- | --- | --- | --- | --- | --- | --- | --- | --- |
| 0 | 118/48248 | 0.24 | Reference |  | Reference |  | Reference |  |
| 1 | 345/105765 | 0.33 | 1.01 (0.98-1.04) | 0.619 | 1.01 (0.98-1.04) | 0.631 | 1.01 (0.97-1.04) | 0.631 |
| 2 | 458/97124 | 0.47 | 1.02 (0.99-1.06) | 0.171 | 1.02 (0.99-1.06) | 0.185 | 1.02 (0.99-1.06) | 0.186 |
| 3 | 428/72022 | 0.59 | 1.04 (1.00-1.07) | 0.046 | 1.04 (1.00-1.07) | 0.053 | 1.04 (1.00-1.07) | 0.057 |
| 4 | 289/42727 | 0.68 | 1.05 (1.00-1.09) | 0.028 | 1.04 (1.00-1.09) | 0.034 | 1.04 (1.00-1.09) | 0.039 |
| 5 | 147/16905 | 0.87 | 1.07 (1.01-1.13) | 0.020 | 1.06 (1.01-1.12) | 0.024 | 1.06 (1.01-1.12) | 0.028 |

Table S8.2The correlation between the number of MetS traits and LUTI risk

| No. of MetS Traits | Event/Total | Event rate (%) | HR (95%CI), model 1 | P-value | HR (95%CI), model 2 | P-value | HR (95%CI), model 3 | P-value |
| --- | --- | --- | --- | --- | --- | --- | --- | --- |
| 0 | 903/48248 | 1.87 | Reference |  | Reference |  | Reference |  |
| 1 | 3138/105765 | 2.97 | 1.10 (1.07-1.13) | <0.001 | 1.08 (1.05-1.11) | <0.001 | 1.08 (1.05-1.11) | <0.001 |
| 2 | 3734/97124 | 3.84 | 1.18 (1.15-1.22) | <0.001 | 1.15 (1.11-1.18) | <0.001 | 1.14 (1.10-1.17) | <0.001 |
| 3 | 3615/72022 | 5.02 | 1.29 (1.25-1.33) | <0.001 | 1.23 (1.19-1.27) | <0.001 | 1.21 (1.17-1.25) | <0.001 |
| 4 | 2824/42727 | 6.61 | 1.45 (1.40-1.50) | <0.001 | 1.35 (1.30-1.39) | <0.001 | 1.29 (1.25-1.34) | <0.001 |
| 5 | 1555/16905 | 9.20 | 1.76 (1.68-1.85) | <0.001 | 1.59 (1.52-1.67) | <0.001 | 1.47 (1.40-1.54) | <0.001 |

Table S8.3The correlation between the number of MetS traits and UTI, NOS risk

**Table S8.** Association between nMetS and UTI Risk stratified by UTI subtypes (UUTI, LUTI and UTI, NOS) (Model 1, 2, 3 adjusted)

| Characteristics | In sensitivity analysis 1 (n=381398) | | |  | In sensitivity analysis 2 (n=319702) | | |
| --- | --- | --- | --- | --- | --- | --- | --- |
| UTI formers (%) | HR (95%CI) | P-value |  | UTI formers (%) | HR (95%CI) | P-value |
| BMI, per 5 kg/m2 increase | 17704 (4.64%) | 1.22 (1.17-1.28) | < 0.001 |  | 14936 (4.67%) | 1.18 (1.11-1.25) | <0.001 |
| Waist circumference, per 10 cm increase | 17704 (4.64%) | 1.23 (1.18-1.27) | < 0.001 |  | 14936 (4.67%) | 1.19 (1.14-1.24) | <0.001 |
| Waist to hip ratio, per 0.05 increase | 17704 (4.64%) | 1.17 (1.14-1.20) | < 0.001 |  | 14936 (4.67%) | 1.13 (1.10-1.16) | <0.001 |
| Body fat percentage, per 5 % increase | 17704 (4.64%) | 1.05 (1.02-1.08) | 0.003 |  | 14936 (4.67%) | 1.05 (1.02-1.08) | 0.001 |
| Whole body fat mass, per 5 kg | 17704 (4.64%) | 1.08 (1.05-1.11) | < 0.001 |  | 14936 (4.67%) | 1.07 (1.04-1.10) | <0.001 |
| Triglyceride per 1 mmol/L | 17704 (4.64%) | 1.09 (1.04-1.14) | < 0.001 |  | 14936 (4.67%) | 1.01 (0.96-1.06) | 0.698 |
| HDL per 1 mmol/L | 17704 (4.64%) | 0.78 (0.68-0.89) | < 0.001 |  | 14936 (4.67%) | 0.81 (0.71-0.93) | 0.002 |
| LDL per 1 mmol/L | 17704 (4.64%) | 0.87 (0.76-1.01) | 0.063 |  | 14936 (4.67%) | 0.77 (0.65-0.91) | 0.002 |
| Total Cholesterol per 1 mmol/L | 17704 (4.64%) | 0.90 (0.84-0.96) | 0.002 |  | 14936 (4.67%) | 0.85 (0.78-0.92) | <0.001 |
| Elevated BP or blood pressure medication | 14916 (3.91%) | 1.52 (1.35-1.72) | < 0.001 |  | 12434 (3.89%) | 1.44 (1.28-1.62) | <0.001 |
| Elevated HbA1c or insulin use | 5555 (1.46%) | 1.69 (1.53-1.87) | < 0.001 |  | 4142 (1.30%) | 1.62 (1.46-1.80) | <0.001 |

Sensitivity analysis l: excluding cases of UTI that occurred within 2 years of follow-up

Sensitivity analysis 2: excluding extreme values of BMI, WC, WHR, BFP, Whole body fat mass, Triglyceride, HDL cholesterol, LDL cholesterol, Total Cholesterol (percentiles outside 1-99)

| Characteristics | In sensitivity analysis 3 (n=382791) | | |  | In sensitivity analysis 4 (n=336497) | | |
| --- | --- | --- | --- | --- | --- | --- | --- |
| UTI formers (%) | HR (95%CI) | P-value |  | UTI formers (%) | HR (95%CI) | P-value |
| BMI, per 5 kg/m2 increase | 19097 (4.99%) | 1.19 (1.14-1.24) | < 0.001 |  | 14924 (4.44%) | 1.20 (1.13-1.28) | <0.001 |
| Waist circumference, per 10 cm increase | 19097 (4.99%) | 1.18 (1.14-1.22) | < 0.001 |  | 14924 (4.44%) | 1.20 (1.16-1.26) | <0.001 |
| Waist to hip ratio, per 0.05 increase | 19097 (4.99%) | 1.13 (1.10-1.16) | < 0.001 |  | 14924 (4.44%) | 1.15 (1.12-1.18) | <0.001 |
| Body fat percentage, per 5 % increase | 19097 (4.99%) | 1.07 (1.04-1.10) | < 0.001 |  | 14924 (4.44%) | 1.05 (1.02-1.08) | 0.001 |
| Whole body fat mass, per 5 kg | 19097 (4.99%) | 1.08 (1.05-1.10) | < 0.001 |  | 14924 (4.44%) | 1.07 (1.04-1.10) | <0.001 |
| Triglyceride per 1 mmol/L | 19097 (4.99%) | 1.06 (1.02-1.11) | 0.008 |  | 14924 (4.44%) | 1.08 (1.03-1.13) | 0.002 |
| HDL per 1 mmol/L | 19097 (4.99%) | 0.82 (0.72-0.94) | 0.003 |  | 14924 (4.44%) | 0.80 (0.69-0.93) | 0.003 |
| LDL per 1 mmol/L | 19097 (4.99%) | 0.85 (0.74-0.98) | 0.025 |  | 14924 (4.44%) | 0.78 (0.66-0.92) | 0.002 |
| Total Cholesterol per 1 mmol/L | 19097 (4.99%) | 0.91 (0.85-0.98) | 0.010 |  | 14924 (4.44%) | 0.86 (0.80-0.94) | <0.001 |
| Elevated BP or blood pressure medication | 16049 (4.19%) | 1.85 (1.64-2.09) | < 0.001 |  | 13410 (3.80%) | 1.50 (1.33-1.69) | <0.001 |
| Elevated HbA1c or insulin use | 5977 (1.56%) | 1.79 (1.62-1.97) | < 0.001 |  | 4710 (1.33%) | 1.63 (1.47-1.81) | <0.001 |

Sensitivity analysis 3: Inverse probability weighting (IPW) trimmed at the 5th to 95th percentiles.

Sensitivity analysis 4: Combination of the three approaches above applied sequentially: excluding participants with incident UTI within 2 years of follow-up, excluding extreme values of BMI, WC, WHR, BFP, whole body fat mass, triglyceride, HDL cholesterol, LDL cholesterol and total cholesterol outside the 1st–99th percentiles, and using IPW trimmed at the 5th to 95th percentiles.

**Table S9.** Sensitivity analysis of hazard ratios (95% CI) for the risk of UTI associated with metabolic, anthropometric, and biochemical parameters (stabilized IPW weights)

BMI, body mass index; HDL, high-density lipoprotein; LDL, low-density lipoprotein; BP, blood pressure; HbA1c, Glycosylated Hemoglobin A1c

| No. of MetS Traits | In sensitivity analysis 1 (n=381398) | | |  | In sensitivity analysis 2 (n=319702) | | |
| --- | --- | --- | --- | --- | --- | --- | --- |
| UTI formers, n (%)* | HR (95%CI) | P-value |  | UTI formers, n (%)* | HR (95%CI) | P-value |
| 0 | 1065 (2.21%) | Reference | Reference |  | 785 (2.08%) | Reference | Reference |
| 1 | 3527 (3.34%) | 1.15 (1.07-1.23) | <0.001 |  | 2537 (2.96%) | 1.12 (1.04-1.20) | 0.003 |
| 2 | 4207 (4.35%) | 1.32 (1.23-1.41) | <0.001 |  | 2810 (3.68%) | 1.28 (1.19-1.37) | <0.001 |
| 3 | 4057 (5.66%) | 1.58 (1.48-1.70) | <0.001 |  | 2606 (4.86%) | 1.51 (1.40-1.63) | <0.001 |
| 4 | 3135 (7.37%) | 1.91 (1.78-2.05) | <0.001 |  | 1672 (6.11%) | 1.75 (1.61-1.89) | <0.001 |
| 5 | 1713 (10.21%) | 2.43 (2.25-2.63) | <0.001 |  | 696 (8.19%) | 2.18 (1.99-2.39) | <0.001 |

Sensitivity analysis l: excluding cases of UTI that occurred within 2 years of follow-up

Sensitivity analysis 2: excluding extreme values of BMI, WC, WHR, BFP, Whole body fat mass, Triglyceride, HDL cholesterol. LDL cholesterol, Total Cholesterol (percentiles outside 1-99)

*Percentage = UTI cases /total participants with the indicated number of MetS traits.

| No. of MetS Traits | In sensitivity analysis 3 (n=382791) | | |  | In sensitivity analysis 4 (n=336497) | | |
| --- | --- | --- | --- | --- | --- | --- | --- |
| UTI formers, n (%)* | HR (95%CI) | P-value |  | UTI formers, n (%)* | HR (95%CI) | P-value |
| 0 | 1177 (2.44%) | Reference | Reference |  | 903 (2.20%) | Reference | Reference |
| 1 | 3787 (3.58%) | 1.12 (1.04-1.19) | 0.002 |  | 3143 (3.31%) | 1.14 (1.05-1.23) | 0.001 |
| 2 | 4541 (4.68%) | 1.28 (1.20-1.37) | <0.001 |  | 3769 (4.24%) | 1.29 (1.20-1.39) | <0.001 |
| 3 | 4400 (6.11%) | 1.51 (1.41-1.62) | <0.001 |  | 3470 (5.44%) | 1.49 (1.38-1.61) | <0.001 |
| 4 | 3347 (7.83%) | 1.78 (1.66-1.91) | <0.001 |  | 2483 (7.02%) | 1.76 (1.63-1.91) | <0.001 |
| 5 | 1845 (10.91%) | 2.30 (2.13-2.49) | <0.001 |  | 1156 (9.40%) | 2.21 (2.01-2.42) | <0.001 |

Sensitivity analysis 3: Inverse probability weighting (IPW) trimmed at the 5th to 95th percentiles.

Sensitivity analysis 4: Combination of the three approaches above applied sequentially: excluding participants with incident UTI within 2 years of follow-up, excluding extreme values of BMI, WC, WHR, BFP, whole body fat mass, triglyceride, HDL cholesterol, LDL cholesterol and total cholesterol outside the 1st–99th percentiles, and using IPW trimmed at the 5th to 95th percentiles.

*Percentage = UTI cases /total participants with the indicated number of MetS traits.

**Table S10.** Sensitivity analysis of hazard ratios (95% Cl) for the risk of UTI associated with nMetS (stabilized IPW weights)

| Characteristics | In sensitivity analysis 1 (n=381398) | | |  | In sensitivity analysis 2 (n=319702) | | |
| --- | --- | --- | --- | --- | --- | --- | --- |
| UTI formers, n (%) | HR (95%CI) | P-value |  | UTI formers, n (%) | HR (95%CI) | P-value |
| BMI, per 5 kg/m2 increase | 17704 (4.64%) | 1.09 (1.08-1.10) | < 0.001 |  | 14936 (4.67%) | 1.09 (1.07-1.10) | <0.001 |
| Waist circumference, per 10 cm increase | 17704 (4.64%) | 1.07 (1.07-1.08) | < 0.001 |  | 14936 (4.67%) | 1.07 (1.06-1.08) | <0.001 |
| Waist to hip ratio, per 0.05 increase | 17704 (4.64%) | 1.05 (1.04-1.05) | < 0.001 |  | 14936 (4.67%) | 1.04 (1.04-1.05) | <0.001 |
| Body fat percentage, per 5 % increase | 17704 (4.64%) | 1.02 (1.02-1.03) | < 0.001 |  | 14936 (4.67%) | 1.02 (1.02-1.03) | <0.001 |
| Whole body fat mass, per 5 kg | 17704 (4.64%) | 1.04 (1.03-1.04) | < 0.001 |  | 14936 (4.67%) | 1.03 (1.03-1.04) | <0.001 |
| Triglyceride per 1 mmol/L | 17704 (4.64%) | 1.04 (1.03-1.04) | < 0.001 |  | 14936 (4.67%) | 1.04 (1.03-1.05) | <0.001 |
| HDL per 1 mmol/L | 17704 (4.64%) | 0.88 (0.86-0.90) | < 0.001 |  | 14936 (4.67%) | 0.89 (0.87-0.92) | <0.001 |
| LDL per 1 mmol/L | 17704 (4.64%) | 0.90 (0.88-0.93) | < 0.001 |  | 14936 (4.67%) | 0.92 (0.89-0.95) | <0.001 |
| Total Cholesterol per 1 mmol/L | 17704 (4.64%) | 0.93 (0.92-0.95) | < 0.001 |  | 14936 (4.67%) | 0.94 (0.93-0.96) | <0.001 |
| Elevated BP or blood pressure medication | 14916 (3.91%) | 1.14 (1.12-1.16) | < 0.001 |  | 12434 (3.89%) | 1.12 (1.10-1.15) | <0.001 |
| Elevated HbA1c or insulin use | 5555 (1.46%) | 1.25 (1.22-1.27) | < 0.001 |  | 4142 (1.30%) | 1.22 (1.19-1.24) | <0.001 |

Sensitivity analysis l: excluding cases of UTI that occurred within 2 years of follow-up

Sensitivity analysis 2: excluding extreme values of BMI, WC, WHR, BFP, Whole body fat mass, Triglyceride, HDL cholesterol. LDL cholesterol, Total Cholesterol (percentiles outside 1-99)

| Characteristics | In sensitivity analysis 3 (n=313916) | | |
| --- | --- | --- | --- |
| UTI formers, n (%) | HR (95%CI) | P-value |
| BMI, per 5 kg/m2 increase | 13646 (4.35%) | 1.09 (1.07-1.10) | < 0.001 |
| Waist circumference, per 10 cm increase | 13646 (4.35%) | 1.07 (1.06-1.08) | < 0.001 |
| Waist to hip ratio, per 0.05 increase | 13646 (4.35%) | 1.04 (1.04-1.05) | < 0.001 |
| Body fat percentage, per 5 % increase | 13646 (4.35%) | 1.02 (1.02-1.03) | < 0.001 |
| Whole body fat mass, per 5 kg | 13646 (4.35%) | 1.03 (1.03-1.04) | < 0.001 |
| Triglyceride per 1 mmol/L | 13646 (4.35%) | 1.04 (1.03-1.05) | < 0.001 |
| HDL per 1 mmol/L | 13646 (4.35%) | 0.90 (0.87-0.92) | < 0.001 |
| LDL per 1 mmol/L | 13646 (4.35%) | 0.93 (0.90-0.96) | < 0.001 |
| Total Cholesterol per 1 mmol/L | 13646 (4.35%) | 0.94 (0.93-0.96) | < 0.001 |
| Elevated BP or blood pressure medication | 11388 (3.63%) | 1.12 (1.10-1.15) | < 0.001 |
| Elevated HbA1c or insulin use | 3800 (1.21%) | 1.21 (1.18-1.24) | < 0.001 |

Sensitivity analysis 3: Combination of the three approaches above applied sequentially: excluding participants with incident UTI within 2 years of follow-up, excluding extreme values of BMI, WC, WHR, BFP, whole body fat mass, triglyceride, HDL cholesterol, LDL cholesterol and total cholesterol outside the 1st–99th percentiles.

**Table S11.** Sensitivity analysis of multivariable-adjusted hazard ratios (95% Cl) for the risk of UTI associated with Metabolic, Anthropometric, and Biochemical Parameters (Model 3 adjusted)

BMI, body mass index; HDL, high-density lipoprotein; LDL, low-density lipoprotein; BP, blood pressure; HbA1c, Glycosylated Hemoglobin A1c

| No. of MetS Traits | In sensitivity analysis 1 (n=381398) | | |  | In sensitivity analysis 2 (n=319702) | | |
| --- | --- | --- | --- | --- | --- | --- | --- |
| UTI formers, n (%)* | HR (95%CI) | P-value |  | UTI formers, n (%)* | HR (95%CI) | P-value |
| 0 | 1065 (2.21%) | Reference | Reference |  | 935 (2.40%) | Reference | Reference |
| 1 | 3527 (3.34%) | 0.91 (0.89-0.93) | <0.001 |  | 3210 (3.50%) | 0.92 (0.90-0.94) | <0.001 |
| 2 | 4207 (4.35%) | 0.98 (0.96-1.00) | 0.091 |  | 3883 (4.52%) | 0.99 (0.97-1.02) | 0.581 |
| 3 | 4057 (5.66%) | 1.08 (1.06-1.11) | <0.001 |  | 3500 (5.80%) | 1.09 (1.07-1.12) | <0.001 |
| 4 | 3135 (7.37%) | 1.21 (1.17-1.24) | <0.001 |  | 2359 (7.31%) | 1.19 (1.16-1.23) | <0.001 |
| 5 | 1713 (10.21%) | 1.42 (1.37-1.47) | <0.001 |  | 1049 (9.90%) | 1.38 (1.32-1.45) | <0.001 |

Sensitivity analysis l: excluding cases of UTI that occurred within 2 years of follow-up

Sensitivity analysis 2: excluding extreme values of BMI, WC, WHR, BFP, Whole body fat mass, Triglyceride, HDL cholesterol. LDL cholesterol, Total Cholesterol (percentiles outside 1-99)

*Percentage = UTI cases /total participants with the indicated number of MetS traits.

| No. of MetS Traits | In sensitivity analysis 3 (n=318598) | | |
| --- | --- | --- | --- |
| UTI formers, n (%)* | HR (95%CI) | P-value |
| 0 | 850 (2.19%) | Reference | Reference |
| 1 | 2995 (3.27%) | 0.92 (0.90-0.94) | <0.001 |
| 2 | 3608 (4.22%) | 0.99 (0.97-1.02) | 0.591 |
| 3 | 3221 (5.37%) | 1.08 (1.06-1.11) | <0.001 |
| 4 | 2218 (6.90%) | 1.19 (1.16-1.23) | <0.001 |
| 5 | 979 (9.30%) | 1.37 (1.31-1.44) | <0.001 |

Sensitivity analysis 3: Combination of the three approaches above applied sequentially: excluding participants with incident UTI within 2 years of follow-up, excluding extreme values of BMI, WC, WHR, BFP, whole body fat mass, triglyceride, HDL cholesterol, LDL cholesterol and total cholesterol outside the 1st–99th percentiles.

*Percentage = UTI cases /total participants with the indicated number of MetS traits.

**Table S12.** Sensitivity analysis of multivariable-adjusted hazard ratios (95% Cl) for the risk of UTI associated with nMetS (Model 3 adjusted)
